# Supplementary material for: Teaching programming using eduScrum methodology
Source: PeerJ journal article supplement (doi:10.7717/peerj-cs.1822), 2024-01-23
Supplement: questionnaire.pdf [file questionnaire.pdf]

# EduScrum

Milí respondenti, prosím o vyplnenie pravdivých informácií, nakoľko je tento dotazník súčasťou výskumu. Ďakujem.

Dear respondents, please fill in the truthful information as this questionnaire is part of the research. Thank you

\* Povinné

1. Škola \*

Označte iba jednu elipsu.

- ZŠ Ďumbierska - IX.A
- ZŠ Ďumbierska - IX.B
- Gymnázium L. Štúra
- Univerzita Mateja Bela v Banskej Bystrici
- Gymnázium M. Rúfusa
- Stredná odborná škola technická
- Gymnázium Andreja Sládkoviča

2. Som \*

Označte iba jednu elipsu.

- chlapec
- dievča

3. Užil/a si sa formou eduScrum. Čo je podľa teba eduScrum? \*

You learned by eduScrum. What is eduScrum in your opinion?

---



---



---



---

4. Porovnaj bežné vyučovanie a eduScrum - k čomu sa viac prikloniš? \*

Označte iba jednu elipsu.

1 2 3 4 5

bežné vyučovanie      eduScrum

Compare regular teaching and eduScrum - which do you prefer?

5. Ako veľmi sa ti páčil eduScrum? \*

How much did you like eduScrum?

Označte iba jednu elipsu.

1 2 3 4 5 6 7 8 9 10

vôbec sa mi nepáčil           super!

6. Pracoval si v tíme. Koľko vás bolo? \*

you worked as part of a team. How many of you were there?

---

7. Na základe čoho ste utvorili tím? \*

On what basis did you form the team?

---

---

---

---

---

8. Ako by si ohodnotil váš tím a spoluprácu? \*

How would you rate your team and cooperation?

Označte iba jednu elipsu.

1 2 3 4 5 6 7 8 9 10

zle sa nám spolupracovalo           spolupracovalo sa nám super

we had a bad cooperation

we had a great cooperation

9. Čo si robil v tíme ty? \*

What did you do in the team?

---

10. Myslíš, že sa s tebou dobre spolupracuje? Si tímový hráč? \*

Označte iba jednu elipsu.

- áno
- skôr áno
- skôr nie
- nie

yes  
rather yes  
rather no  
no

Do you think you're good to work with? Are you a team player?

11. Robil si na hodinách niečo kreatívne? Ak áno, čo to bolo?

Did you do anything creative in class? If yes, what was it?

---

---

---

---

---

12. Myslíš, že na eduScrum hodine môžeš byť viac kreatívny ako na bežnom vyučovaní? \*

Označte iba jednu elipsu.

- áno  
 skôr áno  
 skôr nie  
 nie  
 Iné: \_\_\_\_\_

yes  
 rather yes  
 rather no  
 no  
 others:

Do you think you can be more creative in an eduScrum class than in a regular class?

13. Je dôležité plánovanie v eduScrum? \*

Označte iba jednu elipsu.

- áno  
 skôr áno  
 skôr nie  
 nie  
 Iné: \_\_\_\_\_

yes  
 rather yes  
 rather no  
 no  
 others:

Is task scheduling important in eduScrum?

14. Je dôležité plánovanie úloh? (Nemáme na mysli len eduScrum, ale vo všeobecnosti) \*

Označte iba jednu elipsu.

- áno  
 skôr áno  
 skôr nie  
 nie  
 Iné: \_\_\_\_\_

yes  
 rather yes  
 rather no  
 no  
 others:

Task planning is important (I don't just mean eduScrum, but in general)

15. "eduScrum prevráti vyučovanie hore nohami." Súhlasíš s týmto výrokom? \*

Označte iba jednu elipsu.

- áno  
 skôr áno  
 skôr nie  
 nie  
 Iné: \_\_\_\_\_

yes  
 rather yes  
 rather no  
 no  
 others:

eduScrum turns teaching upside down. Do you agree with this statement?

16. Čo ti dali tieto vyučovacie hodiny? \*

What did these lessons give you?

Začiarknite všetky vyhovujúce

yes rather yes rather no no

fun

|     | áno                      | skôr áno                 | skôr nie                 | nie                      |
|-----|--------------------------|--------------------------|--------------------------|--------------------------|
| fun | <input type="checkbox"/> | <input type="checkbox"/> | <input type="checkbox"/> | <input type="checkbox"/> |

personal growth

|                 | áno                      | skôr áno                 | skôr nie                 | nie                      |
|-----------------|--------------------------|--------------------------|--------------------------|--------------------------|
| personal growth | <input type="checkbox"/> | <input type="checkbox"/> | <input type="checkbox"/> | <input type="checkbox"/> |

motivation for computer science

|                                 | áno                      | skôr áno                 | skôr nie                 | nie                      |
|---------------------------------|--------------------------|--------------------------|--------------------------|--------------------------|
| motivation for computer science | <input type="checkbox"/> | <input type="checkbox"/> | <input type="checkbox"/> | <input type="checkbox"/> |

collaboration

|               | áno                      | skôr áno                 | skôr nie                 | nie                      |
|---------------|--------------------------|--------------------------|--------------------------|--------------------------|
| collaboration | <input type="checkbox"/> | <input type="checkbox"/> | <input type="checkbox"/> | <input type="checkbox"/> |

17. Ako veľmi ti pomohol flipboard (plánovacia tabuľka)?

How much did the flipboard help you?

Označte iba jednu elipsu.

0 1 2 3 4 5

vôbec nepomohla       veľmi pomohla

did not help at all

helped a lot

18. Potreboval/a si často pomoc učiteľa? \*

Have you often needed the help of a teacher?

Označte iba jednu elipsu.

- áno
- skôr áno
- skôr nie
- nie

yes rather yes rather no no

19. Podstatou eduScrum-u je, že veľký problém sa dá vyriešiť vtedy, keď ho rozložíš na menšie problémy a riešiš problémy postupne. Súhlasíš s tým? \*

The essence of eduScrum is that a big problem can be solved if you break it down into smaller problems and solve problems one at a time. Do you agree with that?

Označte iba jednu elipsu.

- áno
- skôr áno
- skôr nie
- nie

yes rather yes rather no no

20. Ako sa ti páčil App Inventor? \*

How did you like App Inventor?

Označte iba jednu elipsu.

1 2 3 4 5

vôbec nepáčil      super

did not like at all

21. Ako si sa zlepšil v programovaní? \*

How did you get better at programming?

Označte iba jednu elipsu.

1      2      3      4      5

---

vôbec som sa nezlepšil v programovaní      dosť som sa zlepšil

I haven't improved my programming at all

I've improved quite a lot

22. Ako veľmi ťa bavili nasledujúce:

How much did you enjoy the following

V každom riadku označte iba jednu elipsu.

|                                               | vôbec nebavilo        | trochu bavilo         | veľmi bavilo          | nerobili sme s nim    |
|-----------------------------------------------|-----------------------|-----------------------|-----------------------|-----------------------|
| <b>App Inventor</b>                           | <input type="radio"/> | <input type="radio"/> | <input type="radio"/> | <input type="radio"/> |
| <b>Android Studio</b>                         | <input type="radio"/> | <input type="radio"/> | <input type="radio"/> | <input type="radio"/> |
| <b>micro:bit</b>                              | <input type="radio"/> | <input type="radio"/> | <input type="radio"/> | <input type="radio"/> |
| <b>MakeCode Arcade (programovanie 2D hry)</b> | <input type="radio"/> | <input type="radio"/> | <input type="radio"/> | <input type="radio"/> |
| <b>Minecraft: Educational Edition</b>         | <input type="radio"/> | <input type="radio"/> | <input type="radio"/> | <input type="radio"/> |
| <b>Programovanie stránok (HTML css)</b>       | <input type="radio"/> | <input type="radio"/> | <input type="radio"/> | <input type="radio"/> |

Webpage programming

23. Čo si robil v App Inventore? \*

If you did the App inventor - what did you do with it?

---

---

---

---

---

24. Ak si robil s nástrojom Android Studio - čo si s ním robil?

If you did Android Studio - what did you do with it?

---

---

---

---

---

25. Ak si robil s micro:bitom - čo si s ním robil?

Four horizontal lines for text input.

If you did micro:bit - what did you do with it?

26. Ak si programoval hry v MakeCode Arcade - aké hry si v ňom robil?

Four horizontal lines for text input.

If you've programmed games in MakeCode Arcade - what kind of games have you made in MakeCode Arcade?

27. Ak si robil s Minecraft: Education Edition - čo si v ňom robil?

Four horizontal lines for text input.

If you've done Minecraft: Education Edition - what have you done in it?

28. Chcel by si sa aj naďalej učiť

Would you like to continue learning

V každom riadku ozn

yes rather yes rather no no don't know/didn't do

|                       | yes                   | rather yes            | rather no             | no                    | don't know/didn't do  |
|-----------------------|-----------------------|-----------------------|-----------------------|-----------------------|-----------------------|
| formou eduScrum?      | <input type="radio"/> | <input type="radio"/> | <input type="radio"/> | <input type="radio"/> | <input type="radio"/> |
| v App Inventore?      | <input type="radio"/> | <input type="radio"/> | <input type="radio"/> | <input type="radio"/> | <input type="radio"/> |
| v Android Studio?     | <input type="radio"/> | <input type="radio"/> | <input type="radio"/> | <input type="radio"/> | <input type="radio"/> |
| s micro:bitom?        | <input type="radio"/> | <input type="radio"/> | <input type="radio"/> | <input type="radio"/> | <input type="radio"/> |
| MakeCode Arcade (hry) | <input type="radio"/> | <input type="radio"/> | <input type="radio"/> | <input type="radio"/> | <input type="radio"/> |
| Minecraft             | <input type="radio"/> | <input type="radio"/> | <input type="radio"/> | <input type="radio"/> | <input type="radio"/> |

29. Chcel by si niečo odkázať p. lektorovi?

Is there anything you would like to say to Mr. Lecturer?

Four horizontal lines for text input.

Tento obsah nie je vytvorený ani schválený spoločnosťou Google.

## Google Formuláre
