# Supplementary material for: Teaching programming using eduScrum methodology
Source: PeerJ Comput Sci. 2024 Jan 23;10:e1822. doi: 10.7717/peerj-cs.1822 (PMC10909224; doi:10.7717/peerj-cs.1822)
Supplement: Supplemental Information 1 [file peerj-cs-10-1822-s001.xlsx]

## Sheet: base
1	2	3	4	5	6			7	8	9	10	11	12	13		14				15	16	17	18	19	20						21					22
School	gender	School year	You learned through eduScrum. What do you think eduScrum is?	Compare regular teaching and eduScrum - which do you prefer?	How much did you like eduScrum?	You've been working in a team. How many of you were there?	On what basis did you form the team	How would you rate your team and cooperation?	What did you do in the team?	Do you think you're good to work with? Are you a team player?	Did you do anything creative in class? If yes, what was it?	Do you think you can be more creative in an eduScrum class than in a regular class?	Is planning important in eduScrum?	Is task planning important? (We don't just mean eduScrum, but in general)	"eduScrum turns teaching upside down." Do you agree with this statement?	What did these lessons give you? [entertainment]	What did these lessons give you? [personal growth (something I learned)]	What did these lessons give you? [motivation for computer science]	What did these lessons give you? [collaboration]	How much did the flipboard (planning flip chart)?	Have you often needed help from a teacher?	The essence of eduScrum is that you can solve a big problem if you break it down into smaller problems and solve problems one at a time. Do you agree with that?	How did you like App Inventor?	How did you get better at programming?	How much did you enjoy the following: [App Inventor]	How much did you enjoy the following: [Android Studio]	How much did you enjoy the following: [micro:bit]	How much did you enjoy the following: [MakeCode Arcade (2D game programming)]	How much did you enjoy the following: [Minecraft: Educational Edition]	How much did you enjoy the following: [Site Programming (HTML, CSS)]	Would you like to continue learning [through eduScrum?]	Would you like to continue learning [in App Inventor?]	Would you like to continue learning [in Android Studio?]	Would you like to continue learning [with micro:bit?]	Would you like to continue learning [MakeCode Arcade (games)]	Is there anything you would like to say to Mr. Lecturer?	Column1	_1	_2	_3	_4	_5	_6
Gymnázium M. Rúfusa	boy		eduScrum je forma učenia v skupinách, ktorá nám prinosla nové zážitky a skúsenosti z oblasti IT. Pracovali sme v teamoch.	3	8	Záležalo na výbere tímu. Ale buď 3 alebo 4	Vyberali sme si postupne ľudí do tímu	8	V každom jednom šprinte som urobil to, na čom sme sa dohodli. Väčšinou to bola hra	rather yes	Väčšinou som robil to, čo už dávno je. Učil som sa	rather yes	yes	yes	rather yes	yes	yes	yes	rather yes	2	rather no	yes	4	3	very much enjoyed	not amused at all	very much enjoyed				probably yes	yes	rather no	yes		Dobrá práca :)	rather no	3	yes	yes	probably yes	8	rather no
Gymnázium M. Rúfusa	boy		Je to forma vyučovania, pri ktorej každý pracuje na vlastnom projekte, a pri tom si rozdelí úlohy tak, aby dokázal vyriešiť určitý problém	4	7	3 až 4	Na začiatku vyberal kapitán, neskôr náhodne	3	snažil som sa najviac zapojiť do vymýšľania aplikácie, neskôr urobiť svoj podiel na práci	rather yes	no	rather yes	yes	yes	rather no	rather yes	yes	rather yes	rather no	0	rather no	rather yes	4	5	very much enjoyed	had a little fun	not amused at all				probably yes	probably yes	probably yes	rather no		V tom Inkognite si bol celkom frajer	yes	5	no	probably yes	probably yes	7	rather no
Gymnázium M. Rúfusa	boy		Práca v skupinách pod vedením scrum mastra	4	8	3.4	Vlastný výber/losovaním	7	Aj scrum mastra, väčšinou som pracoval na logike aplikácii	rather yes	Aplikácie :)	yes	yes	yes	rather no	rather yes	yes	yes	rather yes	3	rather no	rather yes	4	4	very much enjoyed	very much enjoyed	had a little fun				probably yes	probably yes	yes	probably yes		Dobrá práca :D	yes	4	probably yes	probably yes	probably yes	7	no
Gymnázium M. Rúfusa	boy		Ano, eduScrum je forma ucenia v ktorej pracujeme ako jeden tym a pomahame si navzajom ked noco nevieme	5	10	Ano pracoval. Boli sme 4	Na zaklade vyberu nokoho kto si ptm vyberal ostatnych	10	Vzdy noco ine	yes	Aj hej aj no	yes	yes	rather yes	rather yes	yes	yes	yes	yes	3	rather yes	rather yes	1	4	had a little fun	very much enjoyed	very much enjoyed				probably yes	rather no	probably yes	probably yes		Bolo to urcite ine ako normalne hodiny a vies hlavne pomoct ked mame niaky problem alebo nam noco nejde	probably yes	4	probably yes	rather no	probably yes	10	rather yes
Gymnázium M. Rúfusa	boy		Forma učenia kde sa žiaci prerozdelila do tímov a snažia sa pracovať ako v korporátnych firmách na úlohe ktorá im je zadaná	3	8	3.4	Určil sa vždy scrum master pre skupinu a ten si vyberal spomedzi ostatných koho chce	8	Záleží na tom aku úlohu som dostal robil som aj grafické rozhrano aj softvér aplikácie	rather yes	Vymýšľal sme nové aplikácie alebo sa snažili zdokonaliť už existujúce.	rather yes	yes	yes	rather yes	rather yes	yes	yes	yes	2	rather no	yes	4	4	very much enjoyed	very much enjoyed	very much enjoyed				probably yes	probably yes	yes	yes		Je to frajer	yes	4	yes	probably yes	probably yes	8	rather no
Gymnázium M. Rúfusa	girl		práca v tíme	3	8	3.4	výber, losovano	9	snažila som sa spolupracovať s tímom a pomáhať najviac ako sa dalo	yes	aplikácie	rather yes	rather yes	yes	rather yes	rather yes	yes	yes	yes	4	rather no	yes	5	4	very much enjoyed	very much enjoyed	had a little fun				probably yes	yes	probably yes	rather no		Ďakujeme	probably yes	4	rather no	yes	probably yes	8	rather no
Gymnázium M. Rúfusa	boy		Forma učenia pri ktorej daná osoba vedie hodinu podľa určitých plyesv	3	8	Boli sme štyria	Na základe výberu scrum mastera	8	Odpoveď na otázky a vytvoreno svojej aplikácie alebo časti spoločnej	rather yes	Skôr som pracoval doma, na hodinách som sa venoval vzdelávaniu v nových prostrediach	rather yes	yes	yes	rather no	yes	yes	yes	yes	3	rather yes	yes	4	3	had a little fun	had a little fun	had a little fun				probably yes	probably yes	rather no	probably yes		no
Gymnázium M. Rúfusa	boy		Je to vzdelávano na ktorom sa pracuje spolu v skupinách. Je vybraný líder skupiny, ktorý rozdeľuje úlohy.	3	9	V jednom tíme sme boli 4 členovia	Zo začiatku sme si zvolili lídra a ten si ďalej volil svojich členov	9	Snazil som sa splniť vsetky ulohy	yes	Na hodinách som sa prevažne snažil len nájsť inšpiráciu a porozumieť problematike ale na projekte som robil ďalej doma	rather yes	yes	yes	rather yes	rather yes	rather yes	rather yes	yes	2	no	rather yes	4	4	very much enjoyed	not amused at all	very much enjoyed				probably yes	yes	rather no	yes		Super	rather no	4	yes	yes	probably yes	9	no
Gymnázium M. Rúfusa	boy		Je to forma výučby zameraná na prácu v tíme. Študenti sa učia prostredníctvom vlastných chýb a projektov.	2	4	4,3,3,2	Na základe náhodnosti.	8	Zakaždým nočo inšio. Rozdelili sme si úlohy, ktoré sa menili.	rather no	Moja práca na hodinách bolo z väčšej časti kreatívna a to rôznymi spôsobmi.	yes	yes	yes	rather yes	yes	rather yes	rather no	yes	3	rather no	no	3	4	had a little fun	very much enjoyed	not amused at all				rather no	no	yes	no		10 001 000 110 111 100 000 000 000 000 000 000 000 000 000 000 000 000 000 000 000 000 000 000 000 000 000 000 000 000 000 000 000 000 000 000 000 000 000 000 000 000 000 000 000 000 000 000 000 000 000 000 000 000 000 000 000 000 000 000 000 000 000 000	yes	4	no	no	rather no	4	rather no
Gymnázium M. Rúfusa	girl		Program na školách, ktorý dáva študentom možnosť nazrieť do nočoho, čo by na škole pravdepodobne normálne nevyskúšali.	4	8	3.4	Spočiatku si každý Scrum master volil ľudí do tímu, no raz si náhodne ťahali papieriky s menami ľudí.	10	Všetko, na čom sme sa dohodli.	rather yes	Vymýšľala vlastné aplikácie.	yes	rather yes	rather yes	rather yes	yes	yes	yes	yes	1	rather no	yes	5	3	very much enjoyed	not amused at all	very much enjoyed				probably yes	yes	rather no	probably yes		Myslím si, že práca v Android Studiu bola oveľa ťažšia ako v App Inventore, preto by bolo do budúcna probably lepšie, keby sa ľudia pred tým, ako doň prejdú, pripravili aspoň teoreticky (keby sa im vysvetlili základné príkazy, no len prostredníctvom samoštúdia na internete).	rather no	3	yes	yes	probably yes	8	rather no
Gymnázium M. Rúfusa	boy		Jedinečná príležitosť zažiť skúsenosť skupinovej práce a vlastného riadenia štúdia.	4	7	4	Ako kedy. Väčšinou demokraticky. Raz no.	7	programovano/dizajn/otázky podľa pridelených úloh v tíme	yes	yes. Vymýšľano aplikácii a zaujímavých nápadov.	rather yes	yes	yes	rather yes	rather yes	yes	rather yes	rather yes	0	no	rather yes	4	3	very much enjoyed	had a little fun	had a little fun				yes	rather no	probably yes	no		I. fáza (microbit + appinventor) bola super. Prechod do druhej je však dosť veľký skok, pre tých z nás, ktorí neprogramovali v Jave.	probably yes	3	no	rather no	yes	7	rather no
Gymnázium M. Rúfusa	girl		Vyučba v tíme cez vlastne projekty, pricom sa pri tvorbe ucime pracovat s novou vecou	5	9	3,4,4,2	Vzdy si styria ludia vyberali tím, nahodne cez papieriky	5	Zvycajne jednu celu aplikaciu	rather yes	Vymyslala aplikaciu o com bude a jej vyzor	yes	yes	yes	rather no	yes	yes	yes	rather no	0	no	rather yes	2	3	not amused at all	very much enjoyed	not amused at all				yes	rather no	yes	probably yes		Vdaka za sprijemneno vyucovania :)	yes	3	probably yes	rather no	yes	9	no
Gymnázium Ľ. Štúra	boy		Skvelý spôsob štúdia	4	7	6	Na základe dobrej komunikácii a dlhoročnej spolupráce členov tímu.	8	Prácu sme mali spravodlivo rozdelenú	yes	no	yes	yes	yes	no	yes	rather yes	rather yes	yes	3	rather no	yes	4	4	very much enjoyed	not amused at all	very much enjoyed				yes	probably yes	rather no	yes		no	rather no	4	yes	probably yes	yes	7	rather no
Gymnázium Ľ. Štúra	boy		učeno sa formou programovania aby sme mali skúsenosti ak by sme s tým chceli pokračovať	2	6	6	priateľstva	3	nič také konkrétne probably všetko	yes	grafiku a design na appku	rather yes	yes	yes	rather yes	yes	rather no	rather no	rather yes	0	yes	rather yes	4	1	very much enjoyed	not amused at all	very much enjoyed				rather no	probably yes	no	probably yes		si král	no	1	probably yes	probably yes	rather no	6	yes
Gymnázium Ľ. Štúra	girl		ina forma ucenia zalozena na spoluprace a samoeceni	3	7	5	na zaklade sympatii	10	tak rozne	yes	vymyslano napadov o com aplikacie budu a tvoreno aplikacie	yes	yes	yes	rather yes	yes	rather yes	rather no	yes	1	rather no	rather yes	4	4	had a little fun	not amused at all	very much enjoyed				probably yes	probably yes	no	yes		no	no	4	yes	probably yes	probably yes	7	rather no
Gymnázium Ľ. Štúra	boy		Forma učenia samostatne a rozvíjano kreativity a spolupráce	2	3	5	Viac menej náhodne	6	programovano	rather yes	vytváral nové aplikácie z hlavy	yes	rather yes	yes	yes	rather yes	yes	rather no	rather yes	1	rather no	rather yes	5	4	very much enjoyed	not amused at all	very much enjoyed				probably yes	yes	probably yes	yes		V AppInventor-e a MicroBit-e sa jednoducho tvoria aplikácie a človek tvorbu v nich dokážu pochopiť aj sami. Bohužiaľ Android Studio je veľmi zložité na pochopeno a učitelia od nás očakávali nočo nad naše sily. Problém aj bol že nedostatočné (v podstate žiadne) vysvetleno Android Studia budilo v nás iba chaos. Ak by som nočo zmenil tak jedine to aby EduScrum bol celý jeden rok - tým pádom mať viac…	probably yes	4	yes	yes	probably yes	3	rather no
Gymnázium Ľ. Štúra	boy		Neviem	3	5	5	sympatií	10	programoval, riešil otázky	rather yes	no	yes	yes	yes	rather no	yes	rather no	rather yes	rather yes	0	rather no	rather yes	3	3	had a little fun	had a little fun	very much enjoyed				probably yes	rather no	probably yes	rather no		no	probably yes	3	rather no	rather no	probably yes	5	rather no
Gymnázium Ľ. Štúra	girl		forma učenia, kde sa žiaci skôr učia sami a vyhľadávajú si všetky informácie sami, oporu majú len v tíme	2	3	6	dobrých medziľudských vzťahov	7	to čo bolo treba- programovano, hľadano odpovede na otázky... každý člen si vyskúšal všetko	yes	kreatívne som udržovala dobrú náladu v tíme	rather yes	yes	rather yes	yes	yes	rather no	rather no	rather yes	0	rather no	yes	4	2	very much enjoyed	not amused at all	had a little fun				rather no	probably yes	rather no	yes		Podľa mňa pre študentov, ktorí predtým nerobili nič s programovaním toto no je vhodné	rather no	2	yes	probably yes	rather no	3	rather no
Gymnázium Ľ. Štúra	girl		je to forma vzdelávania, v ktorej máme možnosť vzdelávať sa samostatne. podporuje nás k samostatnosti.	3	9	5	ja neviem. proste sme yoskupili ľudí čo sedeli vedľa seba	10	riešila som tázky, programovala a podieĺala sa na tvorbe prezentácie.	yes	programovano je pomerne dosť založené na kreativite aspoň čo sa týka začiatkov, keď je potrebné vymyslieť nápad. Na tejto časti sme sa podielali všetci ale začiatok som odštartovala väčšinou ja.	yes	yes	yes	rather yes	yes	yes	no	yes	0	no	rather yes	5	5	very much enjoyed	not amused at all	very much enjoyed				probably yes	yes	probably yes	yes		bolo zaujímavé vyskúšať nočo nové a vzdelávať sa iným spôsobom. Jediná vec ktorú by som vytkla by bolo nedostatok času a možno veľký skok z app inventora a micro bitu do android studia. No zároveň chápem že tieto veci no je jednoduché a častokrát no je možné zmeniť. V každom prípade by som sa vám chcela poďakovať že ste nám dali možnosť zapojiť sa do tohoto projektu.	probably yes	5	yes	yes	probably yes	8	no
Gymnázium Ľ. Štúra	boy		Forma vyučovania, kde sú študenti rozdelení do skupín a zvolia si vlastného človeka ktorý bude mať na starosti deleno úloh	1	1	6	Na základe dobrej komunikácii a dlhoročnej spolupráci členov tímu	1	Všeobecné, sle najmä programovano	no	Keďže som mal už znalosti programovania tak sa mi ľahšie dizajnovalo a vytváralo aplikácie a mohli byť lepšie	rather yes	yes	yes	Som za yes, ale je probably najdôležitejšie dobre zorganizovať tím, v opačnom prípade to nefunguje	rather no	yes	yes	rather no	4	no	rather no	1	5	had a little fun	very much enjoyed	very much enjoyed				probably yes	no	yes	yes		Keďže programovano je naozaj komplexné, ťažké a náročné na pochopeno je podľa mna veľmi zlé, keď sa to máme naučiť sami. A to nehovoriac o objektovo orientovanom. Podľa mňa metóda eduScram ma budúcnosť ale no úplne v programovaní, minimálne no pri úplných začiatkoch.	yes	5	yes	no	probably yes	1	no
Gymnázium Ľ. Štúra	girl		Vyučovací program	2	3	5	kamaráti	10	Mali sme spoločnú prácu	yes	Snažili sme sa o vytvoreno hry	rather no	rather yes	rather yes	yes	yes	rather no	no	yes	0	rather yes	yes	3	2	had a little fun	not amused at all	had a little fun				no	rather no	no	rather no		Predstavy sa boli oveľa väčšie ako bola realita.	no	2	rather no	rather no	no	3	rather yes
Gymnázium Ľ. Štúra	girl		forma učenia kde študenti sa učia sami a vyhľadávajú si info sami	3	5	5	náhodne	7	otázky a programovano	rather yes	vytvárala som aplikácie	rather yes	yes	yes	yes	rather yes	rather yes	rather no	rather yes	2	rather no	rather yes	5	2	very much enjoyed	not amused at all	very much enjoyed				rather no	probably yes	no	yes		app invetror a micro:bit sú jednoduché ale Android Studio je náročné. Bol to veľký skok. Možno pre vás je to ľahké ale pre nás ani no. Tak isto by ste mali sem tam sa aj spýtať že ako to vidíme my študenti. A no je zlé si sem tam priznať chybu keď sa vám nočo vymkne spod kontroly a my no sme vo vašej hlave takže ak chcete od nás nočo musíte nám to povedať. Ale oceňujem že ste sa vždy snažili pomô…	no	2	yes	probably yes	rather no	5	rather no
Gymnázium Ľ. Štúra	boy		nočo ohľadom formy výučby v oblasti informatiky a programovania	1	4	yes pracoval som v 6 člennom tíme	na základe sympatií	7	snažil som sa pochopiť programovaniu a robil som na samotných aplikáciách ako som len vedel	yes	hrali sme hry (internete) súvisiace s programovaním a to ma bavilo najviac	rather yes	yes	rather yes	rather yes	rather yes	yes	rather no	yes	2	yes	rather yes	1	4	not amused at all	had a little fun	very much enjoyed				no	no	probably yes	yes		Ste fajn típek, trochu viac by bolo vysvetliť o programovaní čo a ako pri začiatkoch hlavne na prvých hodinách ale inak to bolo ok.	probably yes	4	yes	no	no	4	yes
Gymnázium Ľ. Štúra	boy		Vzdelávano bez pomoci učiteľa, v skupinách.	2	2	5	Boli sme voľní.	9	Opravára.	rather yes	Aplikácie	rather no	rather yes	rather no	yes	yes	no	no	rather no	0	yes	rather yes	2	1	not amused at all	had a little fun	had a little fun				no	no	no	no		Trochu viac pomoci by neuškodilo.	no	1	no	no	no	2	yes
Gymnázium Ľ. Štúra	boy		"Učeno" sa programovať	3	4	5	kamaráti	8	všetci sme robili spolu	yes	aplikácie	rather no	rather yes	rather yes	no	rather no	rather no	rather yes	rather yes	0	yes	no	1	1	had a little fun	had a little fun	had a little fun				no	no	probably yes	rather no		Myšlienka takejto výučby na hodine informatiky je dobrá, no realizácia sa mne a môjmu tímu nepáčila. Projekt nám bol predstavený s myšlienkou, že sa naučíme programovať a budeme si môcť spraviť vlastné aplikácie., ale hodiny vyzerali úplne inak. Rozdali nám papiere na ktorých boli úlohy a požiadavky, ktoré od nás chceli, lenže sme nemali žiadne znalosti, ako programovať a len sme odpisovali a kop…
Gymnázium Ľ. Štúra	girl		Vzdelávano bez pomoci učiteľa	2	3	5	Kamarátstva a inteligencie	7	Z každého trochu. Vyskúšala som si robiť všetko.	rather yes	Väčšina vecí bola z tutoriálov	rather yes	rather yes	Je dobré mať nejaký plán ale nokedy no je na škodu sa od neho odkloniť a spraviť nočo spontánne.	yes	rather no	rather yes	no	rather yes	0	rather no	yes	4	1	had a little fun	not amused at all	had a little fun				no	no	no	no		Možno by bolo fajn, menej kritizovať naše práce a prezentácie a brať ohľad na to, že sme to robili prvýkrát a nikto nám nič nevysvetlil, pri čom boli prípady kedy sme zavolali učiteľa a nakonoc sme si to aj tak museli vyriešiť samy.	no	1	no	no	no	3	rather no
Gymnázium Ľ. Štúra	girl		vzdelavano bez pomoci ucitela	4	7	5	Na základe voľby	10	programovala, tvorila prezentácie	yes	Naprogramovala vlastnú aplikáciu, ktorú využívam aj v bežnom živote	yes	rather yes	rather yes	rather yes	rather yes	rather yes	rather yes	yes	3	rather no	rather yes	5	4	very much enjoyed	had a little fun	had a little fun				yes	yes	probably yes	probably yes		vďaka za spríjemneno hodín informatiky	probably yes	4	probably yes	yes	yes	7	rather no
Gymnázium Ľ. Štúra	boy		samostatná práca v skupinách	3	3	5	kamarátstvo	8	programoval a písal otázky	rather yes	skoro nič	rather yes	rather yes	yes	rather yes	yes	rather yes	rather no	yes	4	rather no	yes	4	3	had a little fun	not amused at all	very much enjoyed				rather no	probably yes	rather no	yes		Viac vysvetliť daný program, v ktorom sa programuje.	rather no	3	yes	probably yes	rather no	4	rather no
Gymnázium Ľ. Štúra	girl		občas ale stale tomu dobre nerozumiem.	4	7	5	na základe toho že sme dobre kamaratky	10	väčšinou prezentňacie ale tak trochu všetko	yes	ano prezentácie	yes	yes	yes	rather yes	rather yes	rather yes	rather no	yes	3	rather yes	yes	5	3	very much enjoyed	not amused at all	very much enjoyed				yes	rather no	probably yes	probably yes		lektor bol milý a ústretový. Smažil sa nám pomôcť keď sme nočomu nerozumeli.	probably yes	3	probably yes	rather no	yes	7	rather yes
Gymnázium Ľ. Štúra	girl		Ano vyucovano bez pomocit ucitela	2	2	5	nahodne	8	programovala som aplikacie a hladala odpovede na otazky	yes	aplikacie	neviem	rather yes	rather yes	aj hej aj no	rather no	rather no	rather no	rather yes	0	rather no	rather no	4	3	had a little fun	had a little fun	very much enjoyed				rather no	rather no	rather no	rather no		pomoc by neuskodila	rather no	3	rather no	rather no	rather no	2	rather no
Gymnázium Ľ. Štúra	boy		Samostatná výučba	3	6	5	Tím sme tvorili ako skupina kamarátov	9	Programoval, riešil úlohy	rather yes	Aplikácie	rather yes	yes	yes	rather no	yes	rather no	rather no	rather yes	1	rather yes	rather yes	2	2	had a little fun	not amused at all	very much enjoyed				rather no	rather no	no	yes		Venovať väčšiu pozornosť žiakom, ktorí nevedia o programovaní vôbec nič ako ja. Aspoň vysvetliť úplne základné veci a popísať čo robia. Bolo ťažké sa to všetko naučiť zo všelijakých stryesk a pomerne často meneno programov na programovano.	no	2	yes	rather no	rather no	6	rather yes
Gymnázium Ľ. Štúra	girl		samovýučba podla tutorialov	4	6	5	priatelstva	10	spolupracoval	rather yes	aplikacie	rather yes	rather no	rather yes	yes	rather no	rather yes	rather no	yes	0	rather no	rather yes	4	2	had a little fun	not amused at all	very much enjoyed				no	rather no	no	probably yes		no	no	2	probably yes	rather no	no	6	rather no
Gymnázium Ľ. Štúra	girl		Samovýučba podľa rôznych tutoriálov a článkov	3	5	5	Poznáme sa a dôverujeme si a bývame v blízkosti.	8	V týme sme si prácu rovnoccenne rozdelili a zakaždým sme pracovali na nočom inom	rather yes	nápady na vytvoreno aplikácie	rather yes	yes	yes	rather yes	rather yes	rather yes	rather no
Gymnázium Ľ. Štúra	girl		yes. Samostatná práca, kde sa podľa tutoriálov účíme ako programovať v rôznych aplikáciách.	3	4	5	Pretože sa poznáme a navzájom si dôverujeme a vedeli sme kto je na čo dobrý.	7	My v tíme sme každú novú prácu delili inak, Raz bol nokto scramamster a druhýkrát bol zas nokto iný. Tým pádom sme sa každý naučili ako byť leadrom týmu a mohli si vyskúšať čo je to mať zodpovednosť za tým. Všetci sme sa striedali aj v práci jedny robili prezentáciu druhý otázky a Ďalší aplikáciu a takto sa to menilo.	rather yes	nové nápady ako vylepšiť aplikáciu.	rather yes	yes	yes	yes	rather yes	no	no	rather yes	0	yes	rather yes	2	1	not amused at all	not amused at all	had a little fun				no	no	no	no		Pozitíva: Naučili sme sa spolupracovať. Oboznámili sa s novými aplikáciami . Naučili sa, že programovano pokiaľ do toho nemáš vlohy tak to nejde.
Gymnázium Ľ. Štúra	girl		samovýučba pomocou tutoriálov	2	4	5	priatelstvo	9	aplikacie	yes	aplikacie	rather yes	rather no	rather yes	yes	rather yes	rather yes	rather no
Gymnázium Ľ. Štúra	girl		vyučovací program	1	2	5	kamaráti	10	povzbudozovala, nabádala k lepším výkonom, snažila sa programovať,...	yes	návrh prezentácie	yes	rather yes	yes	yes	rather yes	rather no
Gymnázium Ľ. Štúra	girl		spôsob špeciálneho vyučovania, ktorý sa zameriava na Android	2	3	5	na základe prvotného rozdelenia	7	odpovede na prečo otázky a práca v Android Studio	rather yes	práca v Android Studio tvoreno applikácie Alarm	rather yes	rather yes	rather yes	rather no	rather no	rather yes	rather no	yes	1	rather yes	rather yes	5	3	very much enjoyed	had a little fun	very much enjoyed				rather no	probably yes	probably yes	probably yes		tento spôsob vyučovania sa mi celkom páčil, a myslím, že by sa mohlo robiť takýchto projektov viacej lebo je to podľa môjho názoru zaujímavé pre žiakov. Dané otázky na vypracovano sa mi nepáčili, veľa z nich bolo nepodstatných a nedalo sa ich nikde nájsť.	probably yes	3	probably yes	probably yes	rather no	4	rather yes
Gymnázium Ľ. Štúra	girl		uceno sa samostatne pomocou iternetu a videi, ktore sme si sami nasli na internete	3	6	5	my sme vzdy spolu	10	odpovedala na otazky, programovala aplikacie	rather yes	odpovede na otazky typu ako by sme programovanim zlepsili domace upratovano, alebo vytvarano aplikacii	yes	rather yes	yes	rather yes	rather yes	rather yes	rather no	yes	1	rather no	rather yes	5	3	very much enjoyed	had a little fun	very much enjoyed				probably yes	yes	rather no	yes		urcite by sa zislo uskutocnit tento projekt v druhom polroku kedy by sme mali ake take zakladne znalosti o programovani, na jednotlive sprinty sme mali malo casu, otazky ktore absolutne s tym nesuviseli	rather no	3	yes	yes	probably yes	6	rather no
Gymnázium Ľ. Štúra	girl		Samovýučba na základe nejakého zadania	2	5	V tíme sa mi pracovalo veľmi dobre. Bolo nás 5 girlt.	Na základe nášho kamarátstva	7	Programovla som aplikácie	rather yes	Hlavne dizajn aplikácií.	rather yes	rather yes	yes	rather yes	rather no	rather yes	rather no	yes	1	rather no	rather yes	4	3	very much enjoyed	had a little fun	not amused at all				rather no	probably yes	probably yes	rather no		ďakujeme za vaše rady. možno by ste nabudúce na začiatku mohli vysvetliť aspoň základy programovania.Ďakujeme za váš čas.	probably yes	3	rather no	probably yes	rather no	5	rather no
Stredná odborná škola technická	boy		forma výučbi	2	7	5	priateľstva	8	tvoril aplikácie	rather yes	aplikácie	rather yes	yes	yes	neviem	rather yes	rather yes	rather yes	rather yes	3	no	rather yes	3	2	had a little fun	not amused at all	not amused at all				rather no	no	no	no		Dovidenia	no	2	no	no	rather no		no
Stredná odborná škola technická	boy		Forma výučby	2	9	4	znalosti	8	Vytváral aplikáciu	rather yes	Vytvárano vlastnej aplikácie	yes	rather no	yes	rather no	rather yes	yes	rather yes	rather no	3	rather yes	no	2	4	very much enjoyed	had a little fun	had a little fun				yes	probably yes	rather no	rather no		drž sa	rather no	4	rather no	probably yes	yes		rather yes
Stredná odborná škola technická	boy		Forma výučby	3	8	5	Podľa losovania	8	Tvoril som aplikácie v appinventor alebo micro bit	rather yes	Rôzne aplikácie	rather yes	rather yes	yes	rather no	yes	yes	rather yes	rather yes	3	rather yes	yes	3	4	had a little fun	had a little fun	had a little fun				probably yes	rather no	yes	probably yes		.	yes	4	probably yes	rather no	probably yes		rather yes
Stredná odborná škola technická	boy		yes/Je to program na vychovu mladych ludi	3	10	4	na dobrych vztahoch	10	scrummastera	rather no	nič	rather yes	rather no	rather yes	rather no	rather no	rather yes	yes	no	0	no	rather yes	5	5	had a little fun	not amused at all	very much enjoyed				rather no	rather no	rather no	yes		Ľubim ho <3	yes	1	yes	yes	yes		yes
Stredná odborná škola technická	boy		Forma výučby	3	5	4	Náhody	7	Programoval	rather no	ano, aplikáie	neviem	rather yes	rather yes	neviem	rather yes	yes	no	rather no	0	no	rather yes	3	4	very much enjoyed	not amused at all	had a little fun				probably yes	rather no	no	no		no	no	4	no	rather no	probably yes		no
Stredná odborná škola technická	boy		ANO	5	8	5	Vedomosti	9	programoval aplikacie	rather no	no	rather yes	rather yes	yes	yes	rather yes	yes	rather yes	yes	0	rather no	yes	3	2	had a little fun	had a little fun	not amused at all				rather no	probably yes	probably yes	probably yes		zlepšiť spoluprácu	probably yes	2	probably yes	probably yes	rather no		rather no
Stredná odborná škola technická	boy		Je to forma výučby, ana učil som sa.	4	9	4	Náhoda	9	Aplikácie	yes	Ano, aplikácie had, kresleno, space invader	rather yes	rather yes	yes	neviem	yes	yes	yes	yes	3	no	rather yes	4	5	had a little fun	very much enjoyed	had a little fun				probably yes	rather no	probably yes	rather no		Poznáte Vlada Voštinára?	probably yes	5	rather no	rather no	probably yes		no
Stredná odborná škola technická	boy		nwm	2	4	4	Kamoštva						rather yes
Stredná odborná škola technická	boy		programovano	2	4	4	znalosti	5	programoval	rather yes	no	rather yes	rather no	rather yes	rather no	yes	rather yes	rather yes	rather yes	2	yes	no	1	3	had a little fun	not amused at all	had a little fun				yes	probably yes	probably yes	rather no		ste super	yes	2	probably yes	rather no	probably yes		yes
Stredná odborná škola technická	boy		dačo	2	8	5	na základe komunikácie	10	robil som troška	yes	robil som vlastnú appku, ale po chvíli ma to už nebavilo	rather yes	rather yes	rather yes	rather yes	rather yes
Stredná odborná škola technická	boy		dačo	2	8	5	na základe komunikácie	10	robil som troška	yes	robil som vlastnú appku, ale po chvíli ma to už nebavilo	rather yes	rather yes	rather yes	rather yes	rather yes
Stredná odborná škola technická	boy		forma výučby	3	10	5	vedomostí	10	scram Master	rather yes	kalkulačka, pong ball, piano	yes	rather yes	rather yes	rather no	rather yes	yes	rather yes	yes	4	rather yes	yes	5	4	had a little fun	had a little fun	had a little fun				probably yes	probably yes	probably yes	probably yes		dokonalý učiteľ	probably yes	4	probably yes	probably yes	probably yes		rather yes
Stredná odborná škola technická	boy		yes/učiť sa v programovaní	3	5	4	Na základe lásky	10	kalkulačku,hru,skicár	rather yes	no	rather yes	rather no	yes	rather no	rather yes	rather no	no	yes	0	no	rather yes	3	3	had a little fun	not amused at all	very much enjoyed				rather no	rather no	rather no	yes		Máš peknú skoda octaviu	rather no	3	yes	rather no	rather no		no
Gymnázium M. Rúfusa	boy		Práca v týmoch, striedano leadra tímu.	4	8	4	Kapitáni si volili svojich členov	10	programoval	rather yes	vymýšľal aplikáciu	yes	yes	yes	rather yes	yes	rather yes	yes
Gymnázium M. Rúfusa	boy		Aplikovano fungovania cechu, čo je produktívne.	4	9	4	Na základe podmienok, ktoré určili vyučujúci.	8	Koordinoval som názory.	yes	Riešenia.	yes	yes	yes	Závisieť to môže od vyučovacieho priebehu, ktorého činiteľm sú práve vzdelávaní - študenti.	yes	yes	no	yes
Základná škola	girl		NEVIEM	1	1	89	Podľa 30tich rovnobežiek	10	Jozefa	yes	Hral hry	no	no	no	yes	no	no	no	no	0	no	no	1	1	not amused at all	not amused at all	not amused at all				no	no	no	no		NIČ, pozdravte ho	no	1	no	no	no		no
Základná škola	boy		ale cau	3	9	5	kupujte ale cau merch	1	vsetko oni sa len pozeerali	yes	urobil som hru	rather yes	rather yes	yes	rather no	yes	rather yes	yes	yes	3	rather no	yes	5	4	very much enjoyed	had a little fun	very much enjoyed				no	yes	no	yes		use code ADAMKOSS10	no	4	yes	yes	no		rather no
Základná škola	girl		neviem	3	5	98	vyučujúci nás rozdelil	10	vyhladavala potrebne veci	rather yes	nepamatam si	yes	rather yes	rather yes	rather yes	yes	rather yes	rather yes	yes	1	rather yes	rather yes	4	2	had a little fun	not amused at all	very much enjoyed				rather no	rather no	rather no	rather no		no	rather no	2	rather no	rather no	rather no		rather yes
Základná škola	boy		neviem ale cau	3	5	jop boli sme cca 5.5	random						rather yes
Základná škola	boy		Neviem	3	8	yes. 5	kamaráti	10	hru	rather yes	Psychickú podporu	yes	rather yes	yes	Neviem	yes	yes	yes	yes	3	rather yes	yes	5	3	very much enjoyed	very much enjoyed	very much enjoyed				yes	yes	yes	yes		Pokračujte v tom čo robíte	yes	3	yes	yes	yes		rather yes
Základná škola	girl		neviem	1	2	4	vyberali sme si	9	skoro nič	rather yes	no	rather no	rather yes	rather yes	rather no	yes	rather no	rather no	rather yes	2	rather no	yes	3	2	had a little fun	had a little fun	had a little fun				rather no	rather no	rather no	probably yes		no	rather no	2	probably yes	rather no	rather no		rather no
Základná škola	girl		neviem	3	8	4	sme rodina	9	to co ostatni	no	no	rather yes	rather yes	rather yes	yes	rather yes	rather yes	rather no	rather yes	1	rather yes	yes	1	2	not amused at all	not amused at all	not amused at all				rather no	rather no	rather no	probably yes		no
Základná škola	boy		forma výučby	4	7	5	girltá si vyberali členov	4	všetko	yes	Programoval som	yes	rather yes	yes	rather no	rather yes	yes	yes	rather yes	1	rather yes	rather yes	5	5	very much enjoyed	not amused at all	had a little fun				probably yes	yes	rather no	probably yes		Bolo to celkom zaujímavé , hlavne ten appinventor PS: Sub2Pewdiepie	rather no	5	probably yes	yes	probably yes		rather yes
Základná škola	girl		forma vyučby si samy vytvoriť aplikacie	2	8	3	na základe dobrovolnej voľby	5	nič	rather no	no	rather yes	rather no	yes	rather yes	rather no	no	no	rather no	0	yes	yes	1	1	not amused at all	not amused at all	very much enjoyed				no	no	no	yes		nič	no	1	yes	no	no		yes
Základná škola	girl		forma vyučby si samy vytvorit aplikacie	4	8	3	dobrovolna vola						rather yes
Základná škola	boy		Forma výučby , mozme si samy vytvarat aplikacie	3	8	3	Na základe dobrovoľnej voľby	4	Skoro všetko	yes	Robil vlastnú hru	yes	yes	rather no	rather no	yes	yes	rather yes	yes	1	yes	yes	3	5	had a little fun	not amused at all	very much enjoyed				yes	yes	no	yes		Bavia ma vaše hodiny	no	5	yes	yes	yes		yes
Základná škola	boy		Forma výučby	4	9	5	Spolužiačky vyberali členov	8	Pracoval som so svojím spolužiakom	yes	Programovano	rather yes	yes	yes	rather yes	yes	rather yes	yes	yes	2	rather yes	yes	5	3	very much enjoyed	had a little fun	very much enjoyed				probably yes	probably yes	rather no	probably yes		Bolo to super lebo som si mohol vyskúšať nočo iné len ako písať vo Worde.	rather no	3	probably yes	probably yes	probably yes		rather yes
Základná škola	boy		Pestrejšie vyučovano informatiky	4	7	4	random	10	hlavnú pozíciu	rather yes	Skúšal som vztvoriť nejaku game ale stále sa učím	rather yes	yes	yes	rather yes	rather yes	rather yes	yes
Základná škola	boy		Ci vitrtkam mamu ci boa	3	9	4	Partia	10	Väčšinou veľa vecí	rather yes	už si nepamätám	yes	rather yes	rather yes	rather yes	yes	rather yes	rather yes	rather yes	1	rather yes	yes	4	3	very much enjoyed	had a little fun	had a little fun				probably yes	probably yes	rather no	probably yes		diki jožko za urpiner, papka chutila dobre, a žena fajne kuri	rather no	3	probably yes	probably yes	probably yes		rather yes
Základná škola	boy		Neviem povedať	2	8	4	Sme partia	9	Skoro nič	rather yes	Neviem	yes	rather yes	yes	rather yes	yes	yes	rather yes	yes	3	yes	rather yes	4	4	had a little fun	had a little fun	had a little fun				probably yes	probably yes	probably yes	probably yes		Skvelá práca.	probably yes	4	probably yes	probably yes	probably yes		yes
Základná škola	boy		Veľmi plyesvacia stránka dobrá YODA chváliť.	1	1	4	ľudo-opov trebalo zvýšiť.	8	ja YODA hrať s autobotom a s mečom sveteľným.	yes	Snažil som ja YODA robiť hru ale to YODA nešlo tak on povedať jebať radšej zobral micro.bita a robo-auta a bola sranda mohutná než app.inventorovi.	len v inom no byť.	rather yes	YODA za pravdu vám dať.	YODA nesúhlprobablyť s výrokom vašim.	yes	rather yes	rather no	yes	4	rather yes	no	1	2	not amused at all	very much enjoyed	very much enjoyed				no	no	probably yes	yes		Peťko R2D2 musieť misiu splniť. Pomenovaný strach musieť byť tvoj, než zapudiť môžeš ho. Jedi moc získavať skrz porozumeno, Sith získávať silu moc skrz.	probably yes	2	yes	no	no		rather yes
Gymnázium Ľ. Štúra	boy		forma výučby	4	8	5	kamarátstvo	9	programoval	rather yes	aplikácie	rather yes	rather yes	rather yes	rather yes	yes
Gymnázium Ľ. Štúra	girl		vyučovacia metóda	4	8	5	ako sme chceli	10	úlohy	rather yes	programovala som aplikácie	yes	rather yes	yes	yes	yes	rather yes	rather yes	rather yes	0	yes	yes	5	3	very much enjoyed	not amused at all	very much enjoyed				yes	probably yes	rather no	yes		n	rather no	3	yes	probably yes	yes		yes
Gymnázium Ľ. Štúra	girl		spôsob vyučovania	5	10	5	ako sme chceli	10	programoval	yes	programoval hry	yes	yes	yes	yes	yes	yes	yes	yes	3	no	yes	5	5	very much enjoyed	not amused at all	very much enjoyed				yes	probably yes	no	probably yes		nič	no	4	probably yes	probably yes	yes		no
Gymnázium M. Rúfusa	boy		forma výučby	4	8	4	náhoda, losovano,	8	plyesval úlohy, testoval	yes	programoval aplikacie	yes	yes	rather yes	rather yes	yes	yes	yes	yes	5	yes	yes	5	4	very much enjoyed	not amused at all	very much enjoyed				probably yes	yes	no	yes		n	yes	5	probably yes	yes	probably yes		yes
Gymnázium M. Rúfusa	boy		výučba	5	10	4	losovano	10	testoval, programoval	rather no	programoval	yes	yes	yes	yes	yes	yes	yes	rather yes	0	rather yes	rather yes	5	5	very much enjoyed	not amused at all	very much enjoyed				yes	probably yes	no	probably yes		super	no	5	probably yes	probably yes	yes		rather yes
Stredná odborná škola technická	boy		samoštúdium	3	5	4	priateľstva	6	testoval	rather yes	programoval	rather yes	rather yes	rather yes	rather yes	yes	yes	rather yes	rather yes	0	rather no	rather no	4	4	very much enjoyed	not amused at all	very much enjoyed				yes	yes	no	probably yes		nič	no	4	probably yes	yes	yes		rather no
Stredná odborná škola technická	boy		forma výučby	4	7	5	kamarátstvo	8	programoval	rather yes	vytváral som hry	yes	yes	yes	yes	yes	yes	yes	yes	1	rather yes	rather yes	4	3	very much enjoyed	not amused at all	very much enjoyed				yes	yes	no	yes		len tak Ďalej	no	3	yes	yes	yes		rather yes
Gymnázium Andreja Sládkoviča	boy		typ výučby	5	10	3	podľa toho koho som poznal	10	programoval	yes	hry, aplikácie	yes	yes	yes	yes	yes	yes	yes	yes	0	rather yes	yes	5	5	very much enjoyed	had a little fun	very much enjoyed				yes	yes	yes	yes		len tak Ďalej	yes	5	yes	yes	yes		rather yes
Gymnázium Andreja Sládkoviča	boy		výučba	5	10	3	známosť	9	programoval, testoval	rather yes	programy	rather yes	rather yes	rather yes	rather yes	yes	rather yes	rather yes	rather no	0	rather yes	rather yes	5	4	very much enjoyed	had a little fun	very much enjoyed				yes	yes	yes	yes		pokračovať vo výučbe	yes	4	yes	yes	yes		rather yes
Gymnázium Andreja Sládkoviča	boy		samoštúdium	4	8	3	známosť	8	testoval, vypracovával otázky	rather yes	testoval, vypracovával otázky	rather yes	rather yes	rather yes	rather yes	yes	rather yes	rather yes	rather yes	4	rather yes	rather yes	4	4	had a little fun	not amused at all	had a little fun				yes	probably yes	probably yes	yes		:)	probably yes	4	yes	probably yes	yes		rather yes
Gymnázium Andreja Sládkoviča	boy		forma výučby	3	5	2	kamarátstvo	6	programoval	rather yes	hry	rather yes	rather yes	rather yes	rather yes	yes	rather yes	rather yes	yes	0	rather yes	rather yes	4	3	had a little fun	not amused at all	had a little fun				yes	probably yes	probably yes	yes		nič	probably yes	3	yes	probably yes	yes		rather yes
Gymnázium Andreja Sládkoviča	boy		výučba	4	7	2	kamarátstvo	3	nič	rather no	nič	rather yes	rather yes	rather yes	rather yes	rather yes	rather no	rather no	rather no	0	no	no	5	4	had a little fun	not amused at all	had a little fun				rather no	rather no	rather no	rather no		a	rather no	4	rather no	rather no	rather no		no
Stredná odborná škola technická	boy		Forma	5	7	3.4	Výber	9	Možné aj nemožné	yes	Prezentácie	rather yes	yes	yes	no	yes	rather yes	rather yes	rather no	3	rather yes	yes	2	3	had a little fun	not amused at all	very much enjoyed				probably yes	yes	yes	yes		Bolo mi cťou	probably yes	3	yes	yes	no		rather yes
Stredná odborná škola technická	boy		Nikdy som o tom nepočul	4	5	2	Nevytvorili	8	Nič	yes	Nič	rather yes	rather yes	yes	rather no	rather yes	rather yes	rather yes	rather no	3	rather no	yes	2	2	not amused at all	had a little fun	had a little fun				probably yes	no	probably yes	probably yes		Chcem skúsiť eduScrum	probably yes	2	probably yes	no	probably yes		rather no
Stredná odborná škola technická	boy		Nový spôsob učenia	5	8	4	Na základe výberu vlastností jednotlivých členou.	8	organyzoval	yes	aplikácie	rather yes	yes	yes	rather yes	yes	yes	yes	yes	0	rather yes	yes	4	5	had a little fun	had a little fun	very much enjoyed				probably yes	yes	yes	yes		Je to výborná spôsob vyučovania :)	yes	5	yes	yes	yes		rather yes
Stredná odborná škola technická	girl		aynol	2	6	54	ano	8	daasa	rather no	no	no	yes	yes	yes	rather yes	rather yes	rather yes	rather yes	5	rather yes	yes	5	4	very much enjoyed	not amused at all	very much enjoyed				no	yes	no	yes		bolo dobre haha xd <3	no	5	yes	yes	no		yes
Stredná odborná škola technická	boy		eduScrum	2	3	4	rozkazu	2	programoval	rather yes	programovano	rather no	rather no	rather no	rather no	rather no	rather no	rather no	rather no	1	rather no	rather no	2	2	not amused at all	not amused at all	not amused at all				rather no	rather no	rather no	rather no		táto otázka je povinná	rather no	2	rather no	rather no	rather no		rather no
Stredná odborná škola technická	boy		neviem čo to je	4	5	3	zivotopisu	6	programoval	rather yes	určite ano napriklad mikrobitom	rather yes	rather yes	rather yes	rather no	no	no	no	no	2	rather no	no	4	5	had a little fun	very much enjoyed	had a little fun				rather no	yes	no	yes		dakujem	no	5	yes	yes	no		rather no
Stredná odborná škola technická	boy		neviem	1	1	252	podla ničoho	5	prišiel som do školy	yes	hral som hacknute hry	ako kedy podla toho kolko spím	rather yes	čo ja viem podla toho kde ale na technickej určite no	それは完全に私の猫の中にあります	rather no	rather yes
Stredná odborná škola technická	boy		Vzájomná práca v tímoch, a samovýučba	3	6	4	Náhodne si nás volili lídri tímov.	7	Programoval a pracoval na prezentácii	yes	Programoval som aplikácie a kompletizoval prezentáciu	rather no	rather no	yes	Je to iné, ale hore nohami no. no je to až také zlé, je to nočo nové.	rather yes	rather yes	yes	yes	2	rather no	yes	5	5	very much enjoyed	had a little fun	very much enjoyed				probably yes	yes	rather no	probably yes		Boli ste ochotný nám vždy pomôcť, ďakujeme..	rather no	5	probably yes	yes	probably yes		rather no
Stredná odborná škola technická	boy		na zá	4	9	4	na základe vlastností ludí	8	aplikácie a microbit	rather yes	robil som aplikácie	rather yes	yes	rather yes	rather no	yes	rather yes	yes	rather yes	3	rather yes	yes	5	4	very much enjoyed	had a little fun	very much enjoyed
Stredná odborná škola technická	boy		učil je to super vec a odporučam učit touto formou	5	10	3	Na zaklade schopnistí	10	robil som prace	yes	ano	yes	yes	yes	no	yes	yes	yes	yes	4	rather yes	yes	5	5	very much enjoyed	had a little fun	very much enjoyed				rather no	yes	rather no	yes		bolo to super	probably yes	5	yes	yes	probably yes		rather no
Gymnázium Ľ. Štúra	girl		neviem	1	1	39	no tak my sme nemohli takze som nahnevany	1	hral som tiež hry ale iba hacknute	yes	hladal hacknute hry	ale piču	rather yes	Ek drink die hele skool, want dit is 'n tegnose tegnok	你吃了我的雞巴	no	no	no	no	0	rather no	no	3	5	not amused at all	not amused at all	not amused at all
Stredná odborná škola technická	boy		naučiť sa základy programovania	1	5	4	tímy boli tvorené výberom jednotlivcov ktorý boli leadermi tímu a oni si vyberali členov svojho tímu	7	vytváral aplikácie a pracoval s microbitmi ako aj programovano lego mindstorming	rather yes	tvoril som aplikácie teda programoval a zároveň tvoril robota z lega ktorého sme neskôr programovali	rather no	yes	yes	rather yes	rather yes	rather yes	rather no	rather yes	1	rather no	rather yes	1	3	not amused at all	not amused at all	had a little fun				rather no	no	no	no		no	no	3	no	no	rather no		rather no
Stredná odborná škola technická	boy		Cyklus	4	9	3	Na základe princípov morálky a slušnosti som si nemohol dovoliť nechať mojich menej intelektuálne vyspelých spolužiakov pracovať samých.	10	Programovano	yes	Všetko čo som považoval za prínosné pre fungovano tímu.	yes	yes	yes	rather no	rather yes	yes	rather yes	yes	3	no	yes	5	5	very much enjoyed	very much enjoyed	very much enjoyed				yes	yes	yes	yes		good job	yes	5	yes	yes	yes		no
Stredná odborná škola technická	boy		forma výučby	5	9	3.4	výberu pomocou vlastností, ktoré zadal vyučujúci	10	aplikácie, programovano	yes	aplikácie	yes	yes	yes	yes	yes	yes	yes	yes	4	rather no	yes	5	4	very much enjoyed	very much enjoyed	very much enjoyed				yes	yes	rather no	yes		super	rather no	4	yes	yes	yes		rather no
Stredná odborná škola technická	boy		vyucba v time	5	10	3.4	vlastnosti	10	programoval	yes	hry	yes	yes	yes	yes	yes	yes	yes	yes	5	rather no	yes	5	5	very much enjoyed	very much enjoyed	very much enjoyed				yes	yes	probably yes	yes		super	probably yes	5	yes	yes	yes		rather no
Gymnázium M. Rúfusa	boy		Forma vyucby	5	10	4	Podla nahody	7	Scrummaster	rather yes	Programovano	yes	rather yes	rather yes	yes	yes	yes	yes	rather yes	3	rather no	yes	4	5	very much enjoyed	very much enjoyed	had a little fun				yes	yes	yes	rather no		Super hodiny	yes	5	rather no	yes	yes		rather no
Gymnázium M. Rúfusa	girl		dobré	3	6	4	náhodného výberu	10	programovala	yes	robila som s arduinom	rather yes	rather no	rather yes	rather no	yes	rather yes	rather no	yes	3	rather yes	rather yes	4	4	had a little fun	had a little fun	had a little fun				rather no	rather no	rather no	rather no		probably no	rather no	4	rather no	rather no	rather no		rather yes
Gymnázium M. Rúfusa	boy		moderne techniky	3	4	2	kamaratstva	8	programoval v aplikacii	rather yes	nerobil	rather yes	rather yes	rather no	rather no	rather yes	rather yes	rather no	rather yes	2	rather yes	rather no	3	3	had a little fun	had a little fun	very much enjoyed				rather no	probably yes	rather no	probably yes		dakujem vam za spolupracu :P	rather no	3	probably yes	probably yes	rather no		rather yes
Gymnázium M. Rúfusa	boy		forma výučby pomocou modernej techniky	4	9	boli sme štyria	na základe toho ,že sa bavime aj mimo informatiky	7	pomáhal som kódovať ,hladal som tutorialy na nete.	rather no	pracoval som	yes	rather yes	rather yes	rather no	yes	rather yes	yes	yes	3	rather yes	yes	4	3	very much enjoyed	had a little fun	very much enjoyed				yes	yes	probably yes	probably yes		ďakujeme za váš čas a úsilie ,taktiež za vašu schopnosť pomáhať nám ,aj keď nás to občas nebavilo	probably yes	3	probably yes	yes	yes		rather yes
Gymnázium M. Rúfusa	boy		forma výučby	4	9	4	Náhodne	8	programoval	yes	yes. Vymýšľal som čo ideme robiť	rather yes	rather yes	rather yes	rather yes	rather yes	yes	yes	yes	2	rather no	rather yes	4	4	very much enjoyed	had a little fun	very much enjoyed				yes	probably yes	rather no	yes		no	rather no	4	yes	probably yes	yes		rather no
Gymnázium M. Rúfusa	girl		moderne techniky	3	6	4	nahodny vyber	10	programovano	yes	neviem	rather yes	rather yes	yes	neviem	yes	rather yes	no	yes	3	rather yes	rather yes	3	3	had a little fun	had a little fun	very much enjoyed				yes	yes	no	yes		no	no	3	yes	yes	yes		rather yes
Gymnázium M. Rúfusa	girl		forma vyučovania	4	8	4	náhoda	10	dizajn	yes	no	rather yes	rather yes	rather yes	rather yes	rather yes	rather yes	rather yes	rather yes	4	rather yes	yes	5	5	very much enjoyed	very much enjoyed	very much enjoyed				yes	yes	yes	yes		ste super	probably yes	5	yes	yes	yes		rather yes
Gymnázium M. Rúfusa	girl		Pán Vostinar nás neucil obycajnym spôsobom, ale väčšinou nás nechal pracovať samich	3	8	4	Náhodné	9	Otázky a trochu programovania	rather yes	Vytvárano aplikacii	yes	no	rather yes	rather yes	yes	rather yes	rather yes	yes	5	rather yes	rather yes	4	3	had a little fun	had a little fun	very much enjoyed				yes	yes	yes	yes		Takého učiteľa by som si nechala na učeno....	yes	3	yes	yes	yes		rather yes
Gymnázium M. Rúfusa	girl		pán profesor nás neučil typickým spôsobom, ale väčšinou sme pracovali sami	4	7	4	náhodne	9	otázky a trochu programovano	yes	vytvárano aplikácie	yes	rather no	yes	rather yes	yes	yes
Gymnázium M. Rúfusa	girl		forma výučby	3	7	4	prinútili nás	8	trochu zo všetkého	rather yes	create app aplikácie	rather yes	rather yes	rather yes	rather no	rather yes	yes	yes	yes	1	rather no	rather yes	5	4	had a little fun	not amused at all	had a little fun				probably yes	yes	probably yes	yes		neviem	probably yes	4	yes	yes	probably yes		rather no
Gymnázium M. Rúfusa	girl		neviem	3	6	4	vedomostí	10	prečo otázky	yes	no	neviem	rather yes	rather no	neviem	rather no	rather no	no	rather yes	0	rather no	rather yes	2	2	not amused at all	not amused at all	not amused at all				rather no	rather no	rather no	rather no		nenechavajte nas tu s........	rather no	2	rather no	rather no	rather no		rather no
ZŠ Ďumbierska - IX.A	boy		yes, pracovano v teame	3	6	3	na základe losovania	5	programoval	rather yes	programy	záleží podľa obsahu	yes	yes	rather no	rather no	rather yes	rather no	yes	0	rather no	rather yes	1	3	not amused at all	not amused at all	had a little fun	not amused at all	had a little fun	had a little fun	no	no	no	probably yes	no	no
ZŠ Ďumbierska - IX.A	girl		nemám ani poňatia /metóda práce	1	1	3	náhodného výberu	10	apliácie,hry,rôzne internetové stránky atď...	yes	rôzne hry?	rather yes	rather yes	yes	rather no	no	rather yes	no	yes	0	rather no	rather yes	1	2	not amused at all	not amused at all	had a little fun	not amused at all	not amused at all	had a little fun	no	no	no	rather no	no	XD
ZŠ Ďumbierska - IX.A	girl		probably yes. Neviem čo to je	2	2	yes, traja.	Tak ako sme sedeli	10	Nič, hľadala som obrázky na internete. Snažia som sa zapájať	yes	nič	rather yes	no	rather yes	yes	yes	rather no	no	rather yes	0	rather no	rather yes	1	2	not amused at all	not amused at all	not amused at all	not amused at all	had a little fun	not amused at all	no	no	no	no	no	:))
ZŠ Ďumbierska - IX.A	boy		spôsob výučby	4	7	boli sme traja	Náhodne, na základe dotazníkov	10	Programnoval som	rather yes	robil som iba podľa zadaní	rather yes	yes	yes	rather yes	rather yes	rather yes	rather no	rather yes	3	rather yes	rather yes	3	2	had a little fun	not amused at all	very much enjoyed	had a little fun	not amused at all	had a little fun	probably yes	rather no	rather no	rather no	rather no	.
ZŠ Ďumbierska - IX.A	boy		Spôsob výučby v tímoch. (Ako vo firmách kde sa programuje)	4	7	Traja	Náhodne	7	Zisťoval tvoreno kódu, následné tvoreno toho kódu	rather yes	Väčšinou som robil podľa tutoriálov, takže probably ani no.	rather yes	yes	yes	Príde mi že je toto vyučovano oveľa komplikovanejšie ako "bežné" hodiny. Preto si myslím že na to aby takéto vyučovano mohlo poriadne fungovať, museli by žiaci mať viacej hodín informatiky. To by sa mohlo pobiť s ostatnými "dôležitejšími" predmetmi.	rather no	rather yes	rather no	rather yes	2	rather no	yes	3	3	not amused at all	had a little fun	very much enjoyed	had a little fun	very much enjoyed	had a little fun	rather no	no	probably yes	probably yes	yes	Ďakujem za vašu trpezlivosť s nami.
ZŠ Ďumbierska - IX.A	boy		metóda na výučbu programovania	3	6	3	na príkaz nadriadeného	9	programoval	rather no	občas. výroba stránky	na oboch vieš byť kreatívny	rather yes	yes	rather no	rather yes	yes	rather no	yes	3	rather no	rather yes	3	4	had a little fun	not amused at all	very much enjoyed	had a little fun	very much enjoyed	had a little fun	probably yes	rather no	no	probably yes	probably yes	probably nič takého. Som celkom spokojný s tými hodinami.
ZŠ Ďumbierska - IX.A	boy		Nepamätám sa, čim som sa touto formou učil	3	5	3	boli sme rozdelený náhodne	8	čo som mohol	rather no	hlavne práca s micro bitom	rather no	yes	rather yes	rather no	rather no	rather yes	no	yes	3	rather yes	yes	3	2	had a little fun	had a little fun	very much enjoyed	had a little fun	had a little fun	not amused at all	rather no	probably yes	rather no	yes	rather no	probably nič
ZŠ Ďumbierska - IX.A	girl		Pracovano v tíme	1	1	Boli sme traja	vylosovali sme si mená	10	snažila som sa spolupracovať a otravovala som prívržníkov	yes	Vymýšľala rôzne veci inak	rather yes	no	určite yes ale not for me	no	yes	rather yes	no	yes	0	yes	yes	1	2	not amused at all	not amused at all	had a little fun	had a little fun	very much enjoyed	not amused at all	rather no	no	no	no	no	všetko dobre
ZŠ Ďumbierska - IX.A	girl		pracovano v tíme	3	7	3	Losovali sme si papiere	10	Každý mal nejakú úlohu	yes	yes, napr. Microbit alebo Minecraft	Neviem, je to také diskutabilné.	no	yes	bežné vyučovano yes, lebo je to nočo iné a nové, na čo nemáme pripravené prostriedky	rather yes
ZŠ Ďumbierska - IX.A	boy		kreatívna/originálna vyučovacia metóda	4	8	3, ale pracovali sme individualne	spolusediaci	3	robil som vlastné projekty	rather yes	snažil som sa vymyslieť originálne programy/originálne spracovať zadano	yes	rather yes	rather no	ak sa bude ďalej rozvíjať, tak yes.	rather yes	yes	rather no	no	0	rather yes	rather yes	2	2	not amused at all	not amused at all	had a little fun	not amused at all	had a little fun	very much enjoyed	yes	probably yes	probably yes	rather no	no	tento rok mi rozhodne dal toho viacej ako som očakával a väčšinou sa mi vyučovano vyučovano páčilo.
ZŠ Ďumbierska - IX.A	boy		neviem	2	6	3	rng, náhoda	9	to čo každý	yes	creativitu mám rád ale nepamätám si	rather yes	yes	yes	yes	rather no	rather no	no	yes	1	rather yes	rather yes	2	3	not amused at all	had a little fun	very much enjoyed	had a little fun	had a little fun	not amused at all	no	no	no	rather no	rather no	To no je vaša chyba, ale mňa tak trochu toto nebavilo
ZŠ Ďumbierska - IX.B	boy		Vyučovano na Pc	3	5	yes 4	neviem	10	všetko	yes	yes Skoro všetko	yes	yes	no	yes	yes	yes	yes	yes	2	rather no	yes	2	4	had a little fun	had a little fun	very much enjoyed	had a little fun	had a little fun	very much enjoyed	yes	rather no	no	yes	probably yes	ste super
ZŠ Ďumbierska - IX.B	girl		neviem	3	3	3	nepamätám si	5	neviem	yes	ano	rather yes	rather yes	rather yes	rather yes	rather yes	no	no	rather yes	1	rather yes	rather yes	2	2	not amused at all	not amused at all	had a little fun	had a little fun	not amused at all	not amused at all	rather no	rather no	rather no	rather no	rather no	no
ZŠ Ďumbierska - IX.B	girl		ano	2	2	3	Schopností	9	Všeličo	yes	ano vytvarala hry	rather yes	rather yes	rather yes	rather no	rather no	rather yes	no	yes	2	rather yes	rather yes	2	4	not amused at all	not amused at all	had a little fun	had a little fun	not amused at all	not amused at all
ZŠ Ďumbierska - IX.B	girl		iná forma učeniaNE	2	3	3	boli sme pri sebe	5	to čo som vedela	rather yes	nič kreatívne	rather yes	rather no	rather no	rather yes	rather no	rather yes	rather no	rather yes	2	yes	rather no	2	1	not amused at all	not amused at all	had a little fun	not amused at all	had a little fun	very much enjoyed	rather no	rather no	rather no	probably yes	rather no	no
ZŠ Ďumbierska - IX.B	boy		pohode	4	8	yes bol som v time bolo nas 4	losovano	10	robil som to co mi povedali	yes	ani no	yes	rather yes	rather yes	yes	yes	rather yes	yes	yes	3	rather no	rather yes	4	4	had a little fun	had a little fun	had a little fun	had a little fun	had a little fun	not amused at all	probably yes	probably yes	probably yes	probably yes	probably yes	no
ZŠ Ďumbierska - IX.B	boy		vyučovano na ikt technológiách	1	3	yes 4ks ľudí	na základe vyberania osobností bez toho aby sme o tom predtým vedeli o koho ide	10	napamätám	yes	ja som kreatívny sám o sebe	probably yes	yes	yes	rather no	rather no	rather yes	rather no	yes	3	rather yes	yes	4	3	very much enjoyed	not amused at all	had a little fun	very much enjoyed	had a little fun	not amused at all	rather no	yes	no	rather no	probably yes	Že bol veľmi príjemný, komunikatívny a pomohol keď bolo treba
ZŠ Ďumbierska - IX.B	boy		forma, ktorú sme sa učili nasledujúce mesiace cez počítač	5	10	boli sme 4	na základe empatie a túžbe spraviť najlepšiu aplikáciu	10	Motivoval som náš tím aby pracoval :)	yes	Robil som design aplikácie.	yes	rather yes	yes	no	rather yes	yes	rather yes	yes	5	no	yes	5	4	very much enjoyed	very much enjoyed	had a little fun	had a little fun	very much enjoyed	very much enjoyed	yes	yes	no	yes	yes	Ďakujeme, bolo to super a boli ste skvelý učiteľ
ZŠ Ďumbierska - IX.B	girl		metóda učenia	2	3	4	na základe dotazníkov	5	vytvárala aplikáciu	rather no	vytvárali sme aplikácie a stránky	rather yes	rather yes	rather yes	rather no	rather no	rather yes	rather no	rather no	0	rather yes	rather no	2	2	not amused at all	not amused at all	not amused at all	not amused at all	not amused at all	had a little fun	rather no	no	no	no	no	ani no
ZŠ Ďumbierska - IX.B	girl		metóda učenia	3	5	5	vlastností	5	všetko	yes	vymýšľali sme aplikáciu	rather yes	rather yes	rather yes	no	rather no	rather yes	no	rather yes	0	rather yes	rather yes	2	3	had a little fun	not amused at all	had a little fun	not amused at all	had a little fun	had a little fun	probably yes	rather no	no	rather no	rather no	ani no
ZŠ Ďumbierska - IX.B	girl		uhuhuhuhuhuhuhuhuhuhuhuhuhuhuhuhuhuhuhuhuhuhuhuhuhuhuhuhuhuhuh	2	2	yes pracovala nás 4	Podľa Voštiho papierov :)	8	tvárila sa že nočo robím	rather yes	vytvárala stránky cez HTML	yes	rather no	yes	rather no	yes	yes	rather no	yes	2	yes	yes	4	3	had a little fun	had a little fun	very much enjoyed	had a little fun	very much enjoyed	not amused at all	rather no	rather no	rather no	probably yes	rather no	have a nice dayyyyyyyyyyyyyyy :)
ZŠ Ďumbierska - IX.B	girl		Celkom fajn výučba	4	6	yes, boli 4	podľa dotazníka	4	Spolupracovala a pomáhala	rather yes	Robili sme aplikácie - kalkulačka a hra	yes	rather yes	rather yes	rather no	rather yes	yes	rather yes	rather yes	2	rather yes	rather no	3	2	had a little fun	not amused at all	had a little fun	had a little fun	very much enjoyed	not amused at all	probably yes	probably yes	rather no	probably yes	yes	Dobre vyučoval
ZŠ Ďumbierska - IX.B	girl		metóda vyučovania	4	10	4	na základe vyplnených dotazníkov o našich vlastnostiach	9	vždy nočo iné.	rather yes	prezentácie	yes	rather yes	rather no	yes, ale v dobrom slova zmysle	rather no	yes	no	yes	3	yes	yes	5	2	very much enjoyed	had a little fun	very much enjoyed	not amused at all	very much enjoyed	not amused at all	yes	yes	probably yes	yes	rather no	probably no.
ZŠ Ďumbierska - IX.B	girl		Forma učenia pomocou ktorej sme sa učili	3	7	4	Podľa papierov na zemi	8	pomáhal som	yes	Robili sme rôzne aplikácie	rather yes	yes	yes	rather yes	rather yes	yes	rather yes	yes	0	rather yes	rather yes	3	4	had a little fun	not amused at all	had a little fun	not amused at all	not amused at all	very much enjoyed	probably yes	rather no	no	rather no	rather no	Ďakujeme za super hodiny
ZŠ Ďumbierska - IX.B	girl		neviem , pracovano na počítači	2	3	fuh probably 3-4 sme boli	podľa osobnosti človeka	6	kedže neviem tieto veci a ani ma to nejako nebaví , no som v tom vôbec zručná snažila som sa aspoň trochu pomáhať	rather yes	vytvorila som si vlastnú stránku	neviem možno	rather no	rather yes	no	rather no	rather yes	no	rather yes	0	yes	rather yes	2	2	not amused at all	not amused at all	not amused at all	not amused at all	not amused at all	had a little fun	rather no	rather no	no	no	no	prepáčte , mojimi odpovedami som Vás nechcela nijako uraziť ani nič , ale mňa osobne informatika nebaví. Nikdy som k tomu nemala vzťah a pochybujem že nokedy aj mať budem. Učili ste ale fajn , len mňa to nezaujalo.
ZŠ Ďumbierska - IX.B	boy		yes, je to veľmi dobré, bavilo ma to	5	10	4	vybrali sme si náhodne spolužiakov	10	zapisoval som kroky práce	rather yes	vytváral som pokyny v appinventor	yes	yes	yes	rather yes	yes	yes	yes	yes	5	rather no	yes	5	5	very much enjoyed	not amused at all	very much enjoyed	very much enjoyed	very much enjoyed	very much enjoyed	yes	yes	yes	yes	yes	Vaša práca je veľmi užitočná pre súčasnú generáciu, máte super prístup k Vašim žiakom, taktiež by som s Vami rád spolupracoval v budúcnosti ak by to bolo možné. :)
ZŠ Ďumbierska - IX.B	boy		ano tine hry stranky čo sme robili	1	5	ano 4	na zaklade dotazníka	8	pomahal som ale skôr nič	rather yes	no	no	rather yes	yes	ako sa to vezme nokomu to vyhovovalo mne no mam radčej vyučovano na bežnej hodine	rather yes	yes	rather no	rather yes	0	yes	yes	2	2	not amused at all	not amused at all	very much enjoyed	had a little fun	not amused at all	not amused at all	no	rather no	rather no	probably yes	rather no	Vaša práca bola zaujímava mali ste k nám super prístup.
Gymnázium Ľ. Štúra	girl	osemročné gymnázium kvarta	systém vyučovania, práca v skupinách	3	5	3	na základe kamarátskych vzťahov	8	projekt, prezentácia	rather no	vytvárali sme nový kód samostatne	rather yes	rather yes	rather yes	rather yes	no	rather no	no	rather no	2	no	rather no	1	2	not amused at all	not amused at all	not amused at all	not amused at all	very much enjoyed	not amused at all	probably yes	no	no	no	rather no	bolo by super, ak by nám pán lektor vedel viac pomôcť:)
Gymnázium Ľ. Štúra	girl	osemročné gymnázium kvarta	systém vyučovania	2	2	3	ako prišlo	7	kód aj prezentáciu	yes	yes vymýšľala som nápad na hru	rather yes	no	yes	rather yes	yes
Gymnázium Ľ. Štúra	girl	osemročné gymnázium kvarta	systém vyučovania	4	5	3	podľa náhodného výberu, podľa sympatií	8	skoro všetko	yes	nahrávali sme zvuky zvierat	rather yes	rather yes	yes	rather no	rather yes	rather no	rather no
Gymnázium Ľ. Štúra	boy	osemročné gymnázium kvarta	system vyucovania, praca v skupinach	3	6	3	najskor losovano a ptm tak jak prišlo proste	10	to co ostatny	yes	no	rather yes	rather yes	rather no	rather no	rather yes	rather yes	no	yes	0	no	rather yes	1	4	not amused at all	not amused at all	had a little fun	very much enjoyed	very much enjoyed	had a little fun	probably yes	no	no	probably yes	probably yes	no
Gymnázium Ľ. Štúra	boy	osemročné gymnázium kvarta	forma učenia	3	5	2	random	8	50%	rather yes	programovano	rather yes	rather no	rather yes	rather no	rather no	rather yes	rather no	rather yes	2	rather no	rather yes	2	2	had a little fun	had a little fun	had a little fun	had a little fun	had a little fun	had a little fun	probably yes	rather no	probably yes	probably yes	probably yes	no
Gymnázium Ľ. Štúra	boy	osemročné gymnázium kvarta	Ano, je to nejake zadano prace a odprezentovano	5	9	Boli sme dvaja a potok traja	Na základe toho s kým sa mi najlepšie robí						rather yes
Gymnázium Ľ. Štúra	girl	osemročné gymnázium kvarta	Systém vyučovania	3	7	1	Bola by som príliš veľká pomoc proti ostatným	10	Kodovano, prezentaciu	yes	Hry, ich rozne verzie a vylepšenia k nim	rather yes	rather yes	yes	Neutrálne	rather yes	yes
Gymnázium Ľ. Štúra	girl	osemročné gymnázium kvarta	je to tímová práca na programovaní, štýl učenia	3	7	traja	náhoda	9	kód, prezentáciu	rather yes	vymýšľali sme hru a aplikáciu	rather yes	rather yes	rather yes	rather no	rather yes	rather yes	rather yes	rather yes		rather no	rather yes	2	3	had a little fun		had a little fun	had a little fun			probably yes	rather no				no
Gymnázium Ľ. Štúra	boy	osemročné gymnázium kvarta	systém vyučovano, pri ktorom robíme v skupine	4	8	boli sme dvaja	1. krát podľa papierov so schopnosťami, 2. krát podľa toho ako sme chceli	10	časť prezentácie, pomáhal som s programovaním	yes	vymýšľal som nové hry	yes	yes	rather yes	rather yes	yes	rather yes	rather no	yes	3	rather no	rather yes	4	4	very much enjoyed	not amused at all	not amused at all	very much enjoyed	not amused at all	not amused at all	probably yes	yes	no	no	yes	Že hodiny ma bavili viac ako normálne.
Gymnázium Ľ. Štúra	girl	osemročné gymnázium kvarta	systém vyučovania v skupinách bez nejakého veľkého vysvetlenia učiteľom	3	5	4	na základe pocitu	9	z každého (kód, prezentácia) trochu	rather yes	vymýšľala aplikáciu	rather no	rather yes	rather yes	rather no	rather no	rather yes	rather no	yes	3	rather no	rather yes	2	3	not amused at all	had a little fun	very much enjoyed	had a little fun	had a little fun	had a little fun	probably yes	rather no	no	probably yes	rather no	probably no
Gymnázium Ľ. Štúra	girl	osemročné gymnázium kvarta	systém vyučovania	3	5	3	podla kamaratov	10	kódy	rather yes	ano	rather yes	rather yes	rather yes	neviem sa vyjadriť	yes	rather yes	no	rather yes		rather yes	rather yes	3	2	very much enjoyed			had a little fun								no
Gymnázium Ľ. Štúra	girl	osemročné gymnázium kvarta	yes, je to forma výučby v skupinách.	3	6	yes, boli sme 4.	Na základe náhody.	9	Z každej časti nočo.	rather yes	yes, vytvárala vlastnú aplikáciu a hru.	rather no	rather yes	yes	rather no	rather no	rather yes	rather no	yes	3	rather yes	rather no	2	3	not amused at all	had a little fun	very much enjoyed	very much enjoyed	had a little fun	had a little fun	probably yes	rather no	no	no	yes	Do skorého videnia!
Gymnázium Ľ. Štúra	girl	osemročné gymnázium kvarta	systém vyučovania	3	4	v prvom 2 v druhom 3	najskôr nás rozdelil učiteľ potom sme sa rozhodli sami	10	všetko sme robili spolu	rather yes	vymýšľala som odpovede na otázky alebo akú hru ideme vytvoriť	rather yes	rather yes	rather yes	neviem sa vyjadriť	yes	rather yes	no	yes	0	rather yes	rather yes	3	2	very much enjoyed	not amused at all	not amused at all	had a little fun	not amused at all	not amused at all	probably yes	probably yes	no	no	rather no	no
Gymnázium M. Rúfusa	boy		Systém výučby	4	9	4	Rozne- anonymne, losovanim	10	Programovano,aplikacie	yes	Stale noco	yes	yes	yes	yes	yes	yes	rather yes	yes	4	rather no	yes	5	4	very much enjoyed	we didn't do it with him	very much enjoyed	very much enjoyed	we didn't do it with him	very much enjoyed	yes	probably yes	I don't know, I haven't done	probably yes	probably yes	Nic
Gymnázium M. Rúfusa	boy		Sposob vyucby	4	9	4	Anonymne	9	Prezentacie, programovano, vymyslano napadov	yes		rather yes	yes	yes	yes	rather yes	rather yes	rather yes	yes	4	rather no	yes	5	4	very much enjoyed	we didn't do it with him	very much enjoyed	very much enjoyed	we didn't do it with him	had a little fun	yes	yes	I don't know, I haven't done	probably yes	yes
Gymnázium M. Rúfusa	boy		Pvyucovano v timoch	4	9	4	Na zaklade vyplnenych vlastnosti	10	Kod	yes		yes	yes	yes	rather yes	yes	rather yes	rather yes	yes	3	rather no	yes	5	3	very much enjoyed	we didn't do it with him	very much enjoyed	very much enjoyed	we didn't do it with him	very much enjoyed	probably yes	probably yes	I don't know, I haven't done	yes	yes
Gymnázium M. Rúfusa	boy		Vyucba v timoch	5	10	4	Anonymne	10	Zo vsetkeho trosku	rather yes	Vlastne ulohy	rather yes	yes	yes	yes	rather yes	yes	yes	yes	3	rather no	yes	4	4	very much enjoyed	we didn't do it with him	had a little fun	very much enjoyed	we didn't do it with him	had a little fun	probably yes	yes	I don't know, I haven't done	probably yes	probably yes
Gymnázium M. Rúfusa	boy		Sposob ako prebieha vyucovano inak	5	10	4	Na zaklade kvalit a vlastnosti- papiera	8	Vsetko	yes	Stále nočo	yes	yes	yes	yes	rather yes	rather yes	yes	yes	5	rather yes	yes	5	5	had a little fun	we didn't do it with him	very much enjoyed	very much enjoyed	we didn't do it with him	had a little fun	probably yes	probably yes	I don't know, I haven't done	probably yes	probably yes
Gymnázium M. Rúfusa	boy		Iná výučba ako na predchádzajúcich hodinách informatiky	4	9	4	Na základe papiera od učiteľa	7	Prezentácie na demo hodinu, otázky, hľadano riešení	rather yes		rather yes	rather yes	rather yes	rather yes	yes	rather yes	rather yes	yes	3	rather no	yes	5	3	very much enjoyed	we didn't do it with him	had a little fun	very much enjoyed	we didn't do it with him	had a little fun	yes	yes	I don't know, I haven't done	yes	yes
Gymnázium M. Rúfusa	girl		Typ výučby	5	9	4	Podľa našich vlastností	9	Aplikácie, hry	yes	Prezentácie, stránku projektu, vlastné mobilné aplikácie	yes	yes	yes	yes	yes	rather yes	rather yes	yes	2	rather no	yes	5	5	very much enjoyed	we didn't do it with him	had a little fun	had a little fun	we didn't do it with him	had a little fun	yes	yes	I don't know, I haven't done	yes	yes
Gymnázium M. Rúfusa	girl		Metoda vyucby	4	7	4	Podla papierov od ucitela	8	Teoriu a programovano	rather yes		yes	yes	rather yes	rather yes	yes	rather yes	yes	yes	2	no	yes	5	4	very much enjoyed	we didn't do it with him	very much enjoyed	very much enjoyed	we didn't do it with him	had a little fun	yes	yes	I don't know, I haven't done	yes	yes
Gymnázium M. Rúfusa	girl		Metóda výučby	4	7	4	Kvality a schopnosti	8	Zabavu, programovano	rather yes	Grafiku aplikacie	yes	yes	rather yes	yes	rather yes	rather yes	rather yes	yes	1	no	yes	4	4	very much enjoyed	we didn't do it with him	very much enjoyed	very much enjoyed	we didn't do it with him	had a little fun	probably yes	probably yes	I don't know, I haven't done	probably yes	probably yes
Gymnázium M. Rúfusa	girl		Praca v time, prezentacia cielov, speinty…	4	8	4	Kvality - papier	9	Aplikáciu, stránku	rather yes		rather yes	yes	rather yes	rather yes	yes	yes	rather yes	yes	1	yes	yes	4	4	very much enjoyed	we didn't do it with him	very much enjoyed	very much enjoyed	we didn't do it with him	had a little fun	probably yes	probably yes	I don't know, I haven't done	probably yes	probably yes
Gymnázium M. Rúfusa	girl		Metóda výučby	4	9	4	Papiere od učiteľa	9	Na vsetkom som spolopracovala	rather yes		yes	yes	yes	yes	yes	yes	yes	yes	0	no	yes	4	4	very much enjoyed	we didn't do it with him	very much enjoyed	very much enjoyed	we didn't do it with him	had a little fun	yes	yes	I don't know, I haven't done	yes	yes
Gymnázium M. Rúfusa	girl		Výučba v tíme	4	8	4	Podľa vyplnených papierov o našich schopnostiach	9	Aplikácie a hry	yes		yes	yes	yes	yes	yes	yes	rather yes	yes	1	no	yes	5	4	very much enjoyed	we didn't do it with him	had a little fun	very much enjoyed	we didn't do it with him	had a little fun	yes	yes	I don't know, I haven't done	probably yes	yes
Gymnázium M. Rúfusa	girl		Metóda vyučovania	5	6	4	Schopnosti - anonymnym vyberom	9	Prezentácie, stránku, aplikáciu	rather yes		yes	yes	yes	rather yes	yes	rather yes	rather no	yes	2	rather yes	yes	5	4	very much enjoyed	we didn't do it with him	had a little fun	very much enjoyed	we didn't do it with him	had a little fun	probably yes	probably yes	I don't know, I haven't done	probably yes	probably yes
Gymnázium M. Rúfusa	girl		Výučba	4	8	4	Kvalit a schopnosti	8	Vsetko	rather yes	Vsetko bolo kreativne	yes	yes	rather yes	yes	yes	rather yes	yes	yes	2	yes	yes	5	4	very much enjoyed	we didn't do it with him	had a little fun	had a little fun	we didn't do it with him	had a little fun	probably yes	probably yes		probably yes	probably yes
Gymnázium M. Rúfusa	girl		Forma výučby	5	8	4	Našich schopností	8	Aplikácie	yes		yes	yes	yes	yes	yes	yes	yes	yes	1	no	rather yes	5	3	very much enjoyed	we didn't do it with him	very much enjoyed	very much enjoyed	we didn't do it with him	very much enjoyed	yes	yes	I don't know, I haven't done	yes	yes
Gymnázium M. Rúfusa	girl		Formy výučby	5	10	3	Kvalit a schopnosti	9	Aplikaciu, otázky, prezentáciu	yes		yes	yes	yes	yes	yes	yes	yes	yes	4	no	yes	5	4	very much enjoyed	we didn't do it with him	very much enjoyed	very much enjoyed	we didn't do it with him	not amused at all	yes	yes	I don't know, I haven't done	yes	yes
Gymnázium M. Rúfusa	girl		Metóda vyučovania	5	9	3	Podľa vyplnených papierov na začiatku roka	9	Zo všetkého trošku :)	yes		yes	yes	yes	yes	yes	rather yes	rather no	yes	2	rather yes	rather yes	4	4	very much enjoyed	we didn't do it with him	very much enjoyed	very much enjoyed	we didn't do it with him	had a little fun	yes	yes	I don't know, I haven't done	yes	yes
Gymnázium M. Rúfusa	girl		Vyčovano v tímoch	5	10	3	V úvode roka	9	Stále nočo	rather yes		rather yes	rather yes	rather yes	yes	yes	yes	yes	yes	2	rather yes	yes	5	4	very much enjoyed	we didn't do it with him	had a little fun	very much enjoyed	we didn't do it with him	had a little fun	probably yes	probably yes	I don't know, I haven't done	probably yes	probably yes
Gymnázium M. Rúfusa	girl		Vyučovano odborníkom z praxe	4	8	4	V uvode nejaky papierik sme vyplnali	10	Zo vsetkeho noco	yes		yes	yes	yes	yes	yes	rather yes	rather no	yes	1	rather yes	rather yes	5	4	very much enjoyed	we didn't do it with him	very much enjoyed	very much enjoyed	we didn't do it with him	very much enjoyed	yes	probably yes	I don't know, I haven't done	probably yes	probably yes
Gymnázium M. Rúfusa	boy		samovýučba pomocou tutoriálov v skupinách	5	8	3.4	Kvality - papier	9	robil som iba podľa zadaní	rather yes	nápady na vytvoreno aplikácie	yes	yes	yes	yes	yes	rather yes	yes	yes	4	rather yes	yes	5	4	very much enjoyed	we didn't do it with him	very much enjoyed	very much enjoyed	we didn't do it with him	had a little fun	probably yes	yes	I don't know, I haven't done	probably yes	yes
Gymnázium M. Rúfusa	boy		spôsob výučby	5	9	3 a 4	papierov od učiteľa - probably schopnosti to boli	9	programoval, robil úlohy	rather yes	vymýšľal obsah úloh	rather yes	yes	yes	yes	yes	yes	yes	yes	4	rather yes	yes	5	5	very much enjoyed	we didn't do it with him	very much enjoyed	very much enjoyed	we didn't do it with him	very much enjoyed	yes	yes	I don't know, I haven't done	yes	yes
Gymnázium Ľ. Štúra	girl	osemročné gymnázium kvarta	forma výučby	5	9	4	dokument od učiteľa	9	čo bolo treba	yes	stále nočo	yes	yes	rather yes	yes	yes	yes	yes	yes	4	yes	yes	5	5	very much enjoyed	we didn't do it with him	very much enjoyed	very much enjoyed	we didn't do it with him	very much enjoyed	yes	yes	I don't know, I haven't done	probably yes	yes
Gymnázium M. Rúfusa	boy		forma výučby	5	10	3.4	najprv podľa kvalít a potom si ma vybrali do tímu	9	programovano	yes		yes	yes	yes	yes	yes	yes	yes	yes	4	yes	yes	5	5	very much enjoyed	we didn't do it with him	had a little fun	very much enjoyed	we didn't do it with him	had a little fun	probably yes	yes	I don't know, I haven't done	yes	yes
Gymnázium M. Rúfusa	girl		to ako, sme sa učili - skupiny, úlohy, prezentácie...	5	8	3.4	podľa kvalít a schopností	10	všetci sme nočo robili	yes		yes	yes	yes	yes	yes	yes	yes	yes	4	yes	yes	5	5	very much enjoyed	we didn't do it with him	very much enjoyed	very much enjoyed	we didn't do it with him	very much enjoyed	yes	yes	I don't know, I haven't done	yes	yes
Gymnázium M. Rúfusa	girl		učiteľ neprednáša, iba nás vedie a pomáha	5	9	4	Vzdy si styria ludia vyberali tím, nahodne cez papieriky	9	scrum mastera, logika aplikácií	yes	Vymýšľano aplikácii a zaujímavých nápadov.	yes	yes	yes	yes	yes	yes	rather yes	rather yes	4	rather yes	yes	5	4	very much enjoyed	we didn't do it with him	very much enjoyed	very much enjoyed	we didn't do it with him	very much enjoyed	yes	yes	I don't know, I haven't done	probably yes	probably yes
Gymnázium M. Rúfusa	boy		výučba v skupinách, kde je učiteľ iba kouč	5	9	4	kvalít a schopností a potom losovano neskôr	9	scrum master, logiku, programovano, otázky	yes	vymýšľal logiku aplikácií	yes	yes	yes	yes	rather yes	rather yes	rather yes	rather yes	4	rather yes	yes	5	5	very much enjoyed	we didn't do it with him	had a little fun	had a little fun	we didn't do it with him	had a little fun	yes	yes	I don't know, I haven't done	yes	yes
Gymnázium M. Rúfusa	boy		spôsob ako sme sa učili	5	10	4	losovano, podľa papierov od učiteľa	10	logiku, aplikácie, scrum master	rather yes	všetko bolo kreatívne	yes	yes	yes	yes	yes	yes	rather yes	yes	3	yes	yes	5	4	very much enjoyed	we didn't do it with him	very much enjoyed	very much enjoyed	we didn't do it with him	very much enjoyed	probably yes	probably yes	I don't know, I haven't done	probably yes	probably yes
Gymnázium M. Rúfusa	boy		spôsob ako sme sa učili	5	9	štyria	na základe takého papiera, čo sme vypĺňali	9	logiku a programovano aplikácií	yes	celý čas to bolo kreatívne	yes	yes	yes	yes	yes	yes	yes	yes	5	rather yes	yes	5	5	very much enjoyed	we didn't do it with him	very much enjoyed	very much enjoyed	we didn't do it with him	very much enjoyed	probably yes	probably yes	I don't know, I haven't done	probably yes	probably yes
Gymnázium M. Rúfusa	girl		spôsob ako sme sa učili	4	7	štyria	kamarátstvo, predtým na základe takého papiera	10	vypracovával otázky a robil na úlohách	yes	vymýšľal o čom budú aplikácie/hry	yes	yes	yes	yes	rather yes	rather yes	rather yes	rather yes	3	yes	yes	5	5	very much enjoyed	we didn't do it with him	very much enjoyed	very much enjoyed	we didn't do it with him	very much enjoyed
Gymnázium M. Rúfusa	boy		systém výučby	5	10	4	kamarátstvo, papiere od učiteľa, čo sme vypĺňali	10	v každom šprinte nočo - programovano, logiku, otázky...	yes	logiku hier	yes	yes	yes	yes	yes	yes	rather yes	rather yes	3	rather yes	yes	5	5	very much enjoyed	we didn't do it with him	had a little fun	had a little fun	we didn't do it with him	had a little fun	probably yes	probably yes	I don't know, I haven't done	probably yes	probably yes
Gymnázium M. Rúfusa	girl		to ako sme sa učili - učiteľ pomáhal a nevysveľoval	5	10	4	kamarátstva, schopností	9	robila som prezentácie, vypracovávala otázky, programovalova	yes	programovalova	yes	yes	yes	yes	rather yes	rather yes	rather yes	rather yes	3	yes	yes	5	3	had a little fun	we didn't do it with him	had a little fun	very much enjoyed	we didn't do it with him	had a little fun	probably yes	probably yes	I don't know, I haven't done	probably yes	probably yes
Gymnázium M. Rúfusa	boy		spôsob výučby v tímoch	4	9	4	kamarátstvo	9	programovano	yes		yes	yes	yes	yes	rather yes	rather yes	rather yes	rather yes	3	rather yes	yes	4	3	very much enjoyed	we didn't do it with him	very much enjoyed	very much enjoyed	we didn't do it with him	had a little fun	probably yes	probably yes	I don't know, I haven't done	probably yes	probably yes
Gymnázium M. Rúfusa	girl		spôsob akým sme sa učili	3	6	4	papiere od učitela	9	aplikácie	rather yes	stále nočo	rather yes	rather yes	rather yes	rather yes	rather yes	rather yes	rather yes	rather yes	3	yes	yes	4	3	very much enjoyed	we didn't do it with him	had a little fun	had a little fun	we didn't do it with him	had a little fun	probably yes	probably yes	I don't know, I haven't done	probably yes	probably yes
Gymnázium M. Rúfusa	girl		to ako sme sa učili	3	8	4	učiteľ nás rozdelil podľa vyplnených papierov	8	prezentácie, aplikácie	rather yes	všetko bolo kreatívne	rather yes	rather yes	rather yes	rather yes	rather yes	rather yes	rather yes	rather yes	3	yes	yes	4	3	very much enjoyed	we didn't do it with him	very much enjoyed	had a little fun	we didn't do it with him	had a little fun	probably yes	probably yes	I don't know, I haven't done	probably yes	probably yes
Gymnázium M. Rúfusa	girl		forma výučby	3	6	4	podľa učiteľa	8	aplikácie	rather yes		yes	yes	yes	yes	yes	yes	yes	yes	3	rather yes	yes	4	4	very much enjoyed	we didn't do it with him	had a little fun	very much enjoyed	we didn't do it with him	had a little fun	probably yes	probably yes	I don't know, I haven't done	probably yes	probably yes
Gymnázium M. Rúfusa	girl		spôsob výučby	4	8	4	podľa vyplnených schopností - papiera od učiteľa	9	hry, prezentácie, prečo otázky	yes	hry, prezentácie, prečo otázky	yes	yes	yes	yes	rather yes	rather yes	rather yes	rather yes	4	yes	yes	4	3	had a little fun	we didn't do it with him	very much enjoyed	very much enjoyed	we didn't do it with him	had a little fun	probably yes	probably yes	I don't know, I haven't done	yes	yes
Gymnázium M. Rúfusa	girl		spôsob výučby	3	7	4	papiere od učiteľa	8	všetko, čo bolo treba	yes	celé to bolo kreatívne	yes	yes	yes	rather yes	yes	yes	rather yes	yes	2	rather yes	yes	4	3	very much enjoyed	we didn't do it with him	very much enjoyed	very much enjoyed	we didn't do it with him	very much enjoyed	probably yes	probably yes	I don't know, I haven't done	probably yes	probably yes
Gymnázium M. Rúfusa	girl		forma výučby	3	7	4	kvality a schopnosti - dokument	9	všetci sme robili všetko	yes	nápady na hru/aplikáciu, dizajn	yes	yes	yes	yes	rather yes	rather yes	rather yes	rather yes	3	yes	yes	4	4	very much enjoyed	we didn't do it with him	very much enjoyed	very much enjoyed	we didn't do it with him	very much enjoyed	probably yes	probably yes	I don't know, I haven't done	probably yes	probably yes
Gymnázium M. Rúfusa	girl		vyučovano v skupinách	4	8	4	papier od učiteľa	8	aplikácie	rather yes		yes	yes	yes	yes	yes	yes	rather yes	yes	2	yes	yes	3	3	had a little fun	we didn't do it with him	had a little fun	had a little fun	we didn't do it with him	had a little fun	probably yes	probably yes	I don't know, I haven't done	probably yes	probably yes
Gymnázium Ľ. Štúra	boy	osemročné gymnázium kvarta	metóda vyučovania	5	10	4	na základe papierov, čo sme vypĺňali od učiteľa	9	všetko	yes	programovano	yes	yes	yes	yes	yes	yes	yes	yes	4	rather yes	yes	5	4	very much enjoyed	we didn't do it with him	we didn't do it with him	very much enjoyed	we didn't do it with him	we didn't do it with him	yes	yes	I don't know, I haven't done	I don't know, I haven't done	yes
Gymnázium Ľ. Štúra	boy	osemročné gymnázium kvarta	vyučovano v skupinách, samoštúdium	5	9	4	také papiere, ktoré nám rozdal učiteľ, vypĺňali sme naše schopnosti	9	programovano, vymýšľano nápadu	yes	vymýšľano logiky hry, programovano	yes	yes	yes	rather yes	yes	yes	yes	yes	3	rather yes	yes	5	5	very much enjoyed	we didn't do it with him	we didn't do it with him	very much enjoyed	we didn't do it with him	we didn't do it with him	yes	yes	I don't know, I haven't done	I don't know, I haven't done	yes
Gymnázium Ľ. Štúra	girl	osemročné gymnázium kvarta	metóda výučby	4	9	4	kvality a schopnosti - papier	9	aplikácie	yes	všetko bolo kreatívne	yes	yes	yes	yes	yes	yes	yes	yes	3	yes	rather yes	4	4	very much enjoyed	we didn't do it with him	we didn't do it with him	very much enjoyed	we didn't do it with him	we didn't do it with him	yes	yes	I don't know, I haven't done	I don't know, I haven't done	yes
Gymnázium Ľ. Štúra	girl	osemročné gymnázium kvarta	forma výučby	3	7	4	papier od učiteľa, ktorý sme vypĺňali	8	prezentácia, prečo otázky, morálna podpora	rather yes	vymýšľala som nápady	rather yes	rather yes	rather yes	rather yes	rather yes	rather yes	rather no	rather yes	2	yes	rather yes	3	3	had a little fun	we didn't do it with him	we didn't do it with him	had a little fun	we didn't do it with him	we didn't do it with him	probably yes	probably yes	I don't know, I haven't done	I don't know, I haven't done	probably yes
Gymnázium Ľ. Štúra	girl	osemročné gymnázium kvarta	samoštúdium podľa seba	3	6	4	papier od učiteľa	9	čo bolo treba	yes		rather yes	rather yes	rather yes	rather yes	rather yes	rather yes	rather yes	rather yes	2	rather yes	rather yes	3	3	had a little fun	we didn't do it with him	we didn't do it with him	had a little fun	we didn't do it with him	we didn't do it with him	probably yes	probably yes	I don't know, I haven't done	I don't know, I haven't done	probably yes
Gymnázium Ľ. Štúra	boy	osemročné gymnázium kvarta	forma výučby	5	8	4	papiere od učiteľa	8	všetko sme robili všetci	rather yes		yes	yes	yes	yes	yes	yes	yes	yes	3	yes	yes	5	4	very much enjoyed	very much enjoyed	we didn't do it with him	very much enjoyed	we didn't do it with him	we didn't do it with him	yes	yes	I don't know, I haven't done	I don't know, I haven't done	yes
Gymnázium Ľ. Štúra	girl	osemročné gymnázium kvarta	výučba v tímoch	3	6	4	papier od učiteľa	8	prečo otázky, prezentácie	rather yes		rather yes	rather yes	rather yes	yes	yes	rather yes	rather yes	yes	2	yes	rather yes	3	3	had a little fun	had a little fun	we didn't do it with him	very much enjoyed	we didn't do it with him	we didn't do it with him	probably yes	probably yes	I don't know, I haven't done	I don't know, I haven't done	yes
Gymnázium Ľ. Štúra	boy	osemročné gymnázium kvarta	vyučovano v tímoch, samoštúdium	5	10	4	anonymne na základe vyplnených papierov	9	programovano	yes	všetko	yes	yes	yes	yes	yes	rather yes	yes	yes	3	rather yes	yes	5	4	very much enjoyed	we didn't do it with him	we didn't do it with him	very much enjoyed	we didn't do it with him	we didn't do it with him	yes	yes	I don't know, I haven't done	I don't know, I haven't done	yes
Gymnázium Ľ. Štúra	girl	osemročné gymnázium kvarta	iná forma vyučovania	3	7	4	učiteľ nás rozdelil na základe vyplnených papierov	9	prezentáciu a prečo otázky	rather yes		yes	yes	yes	yes	yes	rather yes	rather yes	yes	2	yes	yes	3	4	very much enjoyed	we didn't do it with him	we didn't do it with him	very much enjoyed	we didn't do it with him	we didn't do it with him	probably yes	probably yes	I don't know, I haven't done	I don't know, I haven't done	probably yes
Gymnázium Ľ. Štúra	girl	osemročné gymnázium kvarta	forma výučby	3	6	4	papiere od učiteľa	9	aplikácie	yes		yes	yes	yes	yes	rather yes	rather yes	rather yes	rather yes	2	rather yes	rather yes	3	3	had a little fun	we didn't do it with him	we didn't do it with him	very much enjoyed	we didn't do it with him	we didn't do it with him	probably yes	probably yes	I don't know, I haven't done	I don't know, I haven't done	probably yes
Gymnázium Ľ. Štúra	girl	osemročné gymnázium kvarta	forma výučby	3	8	4	papiere od učiteľa	8	prezentáciu, prečo otázky, programovano	rather yes		rather yes	rather yes	rather yes	rather yes	yes	rather yes	rather yes	yes	2	rather yes	yes	3	3	very much enjoyed	we didn't do it with him	we didn't do it with him	had a little fun	we didn't do it with him	we didn't do it with him	probably yes	probably yes	I don't know, I haven't done	I don't know, I haven't done	probably yes

## Sheet: boys - girls
School	Gender	School year	You learned through eduScrum. What do you think eduScrum is?	Compare conventional teaching and eduScrum - which do you lean more towards?	How much did you like eduScrum?	You've been working in a team. How many of you were there?	On what basis did you form the team	How would you rate your team and cooperation?	What did you do in the team?	Do you think you're good to work with? Are you a team player?	Did you get creative in class last night? If yes, what was it?	Do you think you can be more creative in an eduScrum class than in a regular class?	Is plyesvano important in eduScrum?	Is task planning important? (We don't just mean eduScrum, but in general)	"eduScrum turns teaching upside down." Do you agree with this statement?	What did these lessons give you? [entertainment]	What did these lessons give you? [personal growth (I learned a lot)]	What did these lessons give you? [motivation for computer science]	What did these lessons give you? [collaboration]	How much did the flipboard help you?	Have you often needed help from a teacher?	The essence of eduScrum is that you can solve a big problem if you break it down into smaller problems and solve problems one at a time. Do you agree with that?	How did you like App Inventor?	How did you get better at programming?	How much did you enjoy the following: [App Inventor]	How much did you enjoy the following: [Android Studio]	How much did you enjoy the following: [micro:bit]	How much did you enjoy the following: [MakeCode Arcade (programmed 2D games)]	How much did you enjoy the following: [Minecraft: Educational Edition]	How much did you enjoy the following: [Site Programming (HTML, CSS)]	Would you like to continue learning [through eduScrum?]	Would you like to continue learning [in App Inventor?]	Would you like to continue learning [in App Inventor?]	Would you like to continue learning [with micro:bit?]	Would you like to continue learning [MakeCode Arcade (games)]	Would you like to continue learning [Minecraft]	Would you like to say good night to Mr. Lecturer?	Column1	_1	_2	_3	_4	_5	_6
Gymnázium M. Rúfusa	girl		práca v tíme	3	8	3.4	výber, losovano	9	snažila som sa spolupracovať s tímom a pomáhať najviac ako sa dalo	yes	aplikácie	rather yes	rather yes	yes	rather yes	rather yes	yes	yes	yes	4	rather no	yes	5	4	very much enjoyed	very much enjoyed	had a little fun				probably yes	yes	probably yes	rather no			Ďakujeme	probably yes	4	rather no	yes	probably yes	8	rather no
Gymnázium M. Rúfusa	girl		Program na školách, ktorý dáva študentom možnosť nazrieť do nočoho, čo by na škole pravdepodobne normálne nevyskúšali.	4	8	3.4	Spočiatku si každý Scrum master volil ľudí do tímu, no raz si náhodne ťahali papieriky s menami ľudí.	10	Všetko, na čom sme sa dohodli.	rather yes	Vymýšľala vlastné aplikácie.	yes	rather yes	rather yes	rather yes	yes	yes	yes	yes	1	rather no	yes	5	3	very much enjoyed	not amused at all	very much enjoyed				probably yes	yes	rather no	probably yes			Myslím si, že práca v Android Studiu bola oveľa ťažšia ako v App Inventore, preto by bolo do budúcna probably lepšie, keby sa ľudia pred tým, ako doň prejdú, pripravili aspoň teoreticky (keby sa im vysvetlili základné príkazy, no len prostredníctvom samoštúdia na internete).	rather no	3	yes	yes	probably yes	8	rather no
Gymnázium M. Rúfusa	girl		Vyučba v tíme cez vlastne projekty, pricom sa pri tvorbe ucime pracovat s novou vecou	5	9	3,4,4,2	Vzdy si styria ludia vyberali tím, nahodne cez papieriky	5	Zvycajne jednu celu aplikaciu	rather yes	Vymyslala aplikaciu o com bude a jej vyzor	yes	yes	yes	rather no	yes	yes	yes	rather no	0	no	rather yes	2	3	not amused at all	very much enjoyed	not amused at all				yes	rather no	yes	probably yes			Vdaka za sprijemneno vyucovania :)	yes	3	probably yes	rather no	yes	9	no
Gymnázium Ľ. Štúra	girl		ina forma ucenia zalozena na spoluprace a samoeceni	3	7	5	na zaklade sympatii	10	tak rozne	yes	vymyslano napadov o com aplikacie budu a tvoreno aplikacie	yes	yes	yes	rather yes	yes	rather yes	rather no	yes	1	rather no	rather yes	4	4	had a little fun	not amused at all	very much enjoyed				probably yes	probably yes	no	yes			no	no	4	yes	probably yes	probably yes	7	rather no
Gymnázium Ľ. Štúra	girl		forma učenia, kde sa žiaci skôr učia sami a vyhľadávajú si všetky informácie sami, oporu majú len v tíme	2	3	6	dobrých medziľudských vzťahov	7	to čo bolo treba- programovano, hľadano odpovede na otázky... každý člen si vyskúšal všetko	yes	kreatívne som udržovala dobrú náladu v tíme	rather yes	yes	rather yes	yes	yes	rather no	rather no	rather yes	0	rather no	yes	4	2	very much enjoyed	not amused at all	had a little fun				rather no	probably yes	rather no	yes			Podľa mňa pre študentov, ktorí predtým nerobili nič s programovaním toto no je vhodné	rather no	2	yes	probably yes	rather no	3	rather no
Gymnázium Ľ. Štúra	girl		je to forma vzdelávania, v ktorej máme možnosť vzdelávať sa samostatne. podporuje nás k samostatnosti.	3	9	5	ja I don't know. proste sme yoskupili ľudí čo sedeli vedľa seba	10	riešila som tázky, programovala a podieĺala sa na tvorbe prezentácie.	yes	programovano je pomerne dosť založené na kreativite aspoň čo sa týka začiatkov, keď je potrebné vymyslieť nápad. Na tejto časti sme sa podielali všetci ale začiatok som odštartovala väčšinou ja.	yes	yes	yes	rather yes	yes	yes	no	yes	0	no	rather yes	5	5	very much enjoyed	not amused at all	very much enjoyed				probably yes	yes	probably yes	yes			bolo zaujímavé vyskúšať nočo nové a vzdelávať sa iným spôsobom. Jediná vec ktorú by som vytkla by bolo nedostatok času a možno veľký skok z app inventora a micro bitu do android studia. No zároveň chápem že tieto veci no je jednoduché a častokrát no je možné zmeniť. V každom prípade by som sa vám chcela poďakovať že ste nám dali možnosť zapojiť sa do tohoto projektu.	probably yes	5	yes	yes	probably yes	8	no
Gymnázium Ľ. Štúra	girl		Vyučovací program	2	3	5	kamaráti	10	Mali sme spoločnú prácu	yes	Snažili sme sa o vytvoreno hry	rather no	rather yes	rather yes	yes	yes	rather no	no	yes	0	rather yes	yes	3	2	had a little fun	not amused at all	had a little fun				no	rather no	no	rather no			Predstavy sa boli oveľa väčšie ako bola realita.	no	2	rather no	rather no	no	3	rather yes
Gymnázium Ľ. Štúra	girl		forma učenia kde študenti sa učia sami a vyhľadávajú si info sami	3	5	5	náhodne	7	otázky a programovano	rather yes	vytvárala som aplikácie	rather yes	yes	yes	yes	rather yes	rather yes	rather no	rather yes	2	rather no	rather yes	5	2	very much enjoyed	not amused at all	very much enjoyed				rather no	probably yes	no	yes			app invetror a micro:bit sú jednoduché ale Android Studio je náročné. Bol to veľký skok. Možno pre vás je to ľahké ale pre nás ani no. Tak isto by ste mali sem tam sa aj spýtať že ako to vidíme my študenti. A no je zlé si sem tam priznať chybu keď sa vám nočo vymkne spod kontroly a my no sme vo vašej hlave takže ak chcete od nás nočo musíte nám to povedať. Ale oceňujem že ste sa vždy snažili pomô…	no	2	yes	probably yes	rather no	5	rather no
Gymnázium Ľ. Štúra	girl		Vzdelávano bez pomoci učiteľa	2	3	5	Kamarátstva a inteligencie	7	Z každého trochu. Vyskúšala som si robiť všetko.	rather yes	Väčšina vecí bola z tutoriálov	rather yes	rather yes	Je dobré mať nejaký plán ale nokedy no je na škodu sa od neho odkloniť a spraviť nočo spontánne.	yes	rather no	rather yes	no	rather yes	0	rather no	yes	4	1	had a little fun	not amused at all	had a little fun				no	no	no	no			Možno by bolo fajn, menej kritizovať naše práce a prezentácie a brať ohľad na to, že sme to robili prvýkrát a nikto nám nič nevysvetlil, pri čom boli prípady kedy sme zavolali učiteľa a nakonoc sme si to aj tak museli vyriešiť samy.	no	1	no	no	no	3	rather no
Gymnázium Ľ. Štúra	girl		vzdelavano bez pomoci ucitela	4	7	5	Na základe voľby	10	programovala, tvorila prezentácie	yes	Naprogramovala vlastnú aplikáciu, ktorú využívam aj v bežnom živote	yes	rather yes	rather yes	rather yes	rather yes	rather yes	rather yes	yes	3	rather no	rather yes	5	4	very much enjoyed	had a little fun	had a little fun				yes	yes	probably yes	probably yes			vďaka za spríjemneno hodín informatiky	probably yes	4	probably yes	yes	yes	7	rather no
Gymnázium Ľ. Štúra	girl		občas ale stale tomu dobre nerozumiem.	4	7	5	na základe toho že sme dobre kamaratky	10	väčšinou prezentňacie ale tak trochu všetko	yes	ano prezentácie	yes	yes	yes	rather yes	rather yes	rather yes	rather no	yes	3	rather yes	yes	5	3	very much enjoyed	not amused at all	very much enjoyed				yes	rather no	probably yes	probably yes			lektor bol milý a ústretový. Smažil sa nám pomôcť keď sme nočomu nerozumeli.	probably yes	3	probably yes	rather no	yes	7	rather yes
Gymnázium Ľ. Štúra	girl		Ano vyucovano bez pomocit ucitela	2	2	5	nahodne	8	programovala som aplikacie a hladala odpovede na otazky	yes	aplikacie	I don't know	rather yes	rather yes	aj hej aj no	rather no	rather no	rather no	rather yes	0	rather no	rather no	4	3	had a little fun	had a little fun	very much enjoyed				rather no	rather no	rather no	rather no			pomoc by neuskodila	rather no	3	rather no	rather no	rather no	2	rather no
Gymnázium Ľ. Štúra	girl		samovýučba podla tutorialov	4	6	5	priatelstva	10	spolupracoval	rather yes	aplikacie	rather yes	rather no	rather yes	yes	rather no	rather yes	rather no	yes	0	rather no	rather yes	4	2	had a little fun	not amused at all	very much enjoyed				no	rather no	no	probably yes			no	no	2	probably yes	rather no	no	6	rather no
Gymnázium Ľ. Štúra	girl		Samovýučba podľa rôznych tutoriálov a článkov	3	5	5	Poznáme sa a dôverujeme si a bývame v blízkosti.	8	V týme sme si prácu rovnoccenne rozdelili a zakaždým sme pracovali na nočom inom	rather yes	nápady na vytvoreno aplikácie	rather yes	yes	yes	rather yes	rather yes	rather yes	rather no			rather yes	rather yes	3	3							probably yes	probably yes
Gymnázium Ľ. Štúra	girl		yes. Samostatná práca, kde sa podľa tutoriálov účíme ako programovať v rôznych aplikáciách.	3	4	5	Pretože sa poznáme a navzájom si dôverujeme a vedeli sme kto je na čo dobrý.	7	My v tíme sme každú novú prácu delili inak, Raz bol nokto scramamster a druhýkrát bol zas nokto iný. Tým pádom sme sa každý naučili ako byť leadrom týmu a mohli si vyskúšať čo je to mať zodpovednosť za tým. Všetci sme sa striedali aj v práci jedny robili prezentáciu druhý otázky a Ďalší aplikáciu a takto sa to menilo.	rather yes	nové nápady ako vylepšiť aplikáciu.	rather yes	yes	yes	yes	rather yes	no	no	rather yes	0	yes	rather yes	2	1	not amused at all	not amused at all	had a little fun				no	no	no	no			Pozitíva: Naučili sme sa spolupracovať. Oboznámili sa s novými aplikáciami . Naučili sa, že programovano pokiaľ do toho nemáš vlohy tak to nejde.
Gymnázium Ľ. Štúra	girl		samovýučba pomocou tutoriálov	2	4	5	priatelstvo	9	aplikacie	yes	aplikacie	rather yes	rather no	rather yes	yes	rather yes	rather yes	rather no			rather yes	rather yes	3	3							probably yes	probably yes
Gymnázium Ľ. Štúra	girl		vyučovací program	1	2	5	kamaráti	10	povzbudozovala, nabádala k lepším výkonom, snažila sa programovať,...	yes	návrh prezentácie	yes	rather yes	yes	yes	rather yes	rather no				rather yes	rather yes	3	3							probably yes	probably yes
Gymnázium Ľ. Štúra	girl		spôsob špeciálneho vyučovania, ktorý sa zameriava na Android	2	3	5	na základe prvotného rozdelenia	7	odpovede na prečo otázky a práca v Android Studio	rather yes	práca v Android Studio tvoreno applikácie Alarm	rather yes	rather yes	rather yes	rather no	rather no	rather yes	rather no	yes	1	rather yes	rather yes	5	3	very much enjoyed	had a little fun	very much enjoyed				rather no	probably yes	probably yes	probably yes			tento spôsob vyučovania sa mi celkom páčil, a myslím, že by sa mohlo robiť takýchto projektov viacej lebo je to podľa môjho názoru zaujímavé pre žiakov. Dané otázky na vypracovano sa mi nepáčili, veľa z nich bolo nepodstatných a nedalo sa ich nikde nájsť.	probably yes	3	probably yes	probably yes	rather no	4	rather yes
Gymnázium Ľ. Štúra	girl		uceno sa samostatne pomocou iternetu a videi, ktore sme si sami nasli na internete	3	6	5	my sme vzdy spolu	10	odpovedala na otazky, programovala aplikacie	rather yes	odpovede na otazky typu ako by sme programovanim zlepsili domace upratovano, alebo vytvarano aplikacii	yes	rather yes	yes	rather yes	rather yes	rather yes	rather no	yes	1	rather no	rather yes	5	3	very much enjoyed	had a little fun	very much enjoyed				probably yes	yes	rather no	yes			urcite by sa zislo uskutocnit tento projekt v druhom polroku kedy by sme mali ake take zakladne znalosti o programovani, na jednotlive sprinty sme mali malo casu, otazky ktore absolutne s tym nesuviseli	rather no	3	yes	yes	probably yes	6	rather no
Gymnázium Ľ. Štúra	girl		Samovýučba na základe nejakého zadania	2	5	V tíme sa mi pracovalo veľmi dobre. Bolo nás 5 girlt.	Na základe nášho kamarátstva	7	Programovla som aplikácie	rather yes	Hlavne dizajn aplikácií.	rather yes	rather yes	yes	rather yes	rather no	rather yes	rather no	yes	1	rather no	rather yes	4	3	very much enjoyed	had a little fun	not amused at all				rather no	probably yes	probably yes	rather no			ďakujeme za vaše rady. možno by ste nabudúce na začiatku mohli vysvetliť aspoň základy programovania.Ďakujeme za váš čas.	probably yes	3	rather no	probably yes	rather no	5	rather no
Základná škola	girl		I don't know	1	1	89	Podľa 30tich rovnobežiek	10	Jozefa	yes	Hral hry	no	no	no	yes	no	no	no	no	0	no	no	1	1	not amused at all	not amused at all	not amused at all				no	no	no	no			NIČ, pozdravte ho	no	1	no	no	no		no
Základná škola	girl		I don't know	3	5	98	vyučujúci nás rozdelil	10	vyhladavala potrebne veci	rather yes	nepamatam si	yes	I don't know	rather yes	rather yes	yes	rather yes	rather yes	yes	1	rather yes	rather yes	4	2	had a little fun	not amused at all	very much enjoyed				rather no	rather no	rather no	rather no			no	rather no	2	rather no	rather no	rather no		rather yes
Základná škola	girl		I don't know	1	2	4	vyberali sme si	9	skoro nič	rather yes	no	rather no	rather yes	rather yes	rather no	yes	rather no	rather no	rather yes	2	rather no	yes	3	2	had a little fun	had a little fun	had a little fun				rather no	rather no	rather no	probably yes			no	rather no	2	probably yes	rather no	rather no		rather no
Základná škola	girl		I don't know	3	8	4	sme rodina	9	to co ostatni	no	no	rather yes	rather yes	rather yes	yes	rather yes	rather yes	rather no	rather yes	1	rather yes	yes	1	2	not amused at all	not amused at all	not amused at all				rather no	rather no	rather no	probably yes			no
Základná škola	girl		forma vyučby si samy vytvoriť aplikacie	2	8	3	na základe dobrovolnej voľby	5	nič	rather no	no	rather yes	rather no	yes	rather yes	rather no	no	no	rather no	0	yes	yes	1	1	not amused at all	not amused at all	very much enjoyed				no	no	no	yes			nič	no	1	yes	no	no		yes
Základná škola	girl		forma vyučby si samy vytvorit aplikacie	4	8	3	dobrovolna vola	8													rather yes	rather yes	3	3							probably yes	probably yes
Gymnázium Ľ. Štúra	girl		vyučovacia metóda	4	8	5	ako sme chceli	10	úlohy	rather yes	programovala som aplikácie	yes	rather yes	yes	yes	yes	rather yes	rather yes	rather yes	0	yes	yes	5	3	very much enjoyed	not amused at all	very much enjoyed				yes	probably yes	rather no	yes			n	rather no	3	yes	probably yes	yes		yes
Gymnázium Ľ. Štúra	girl		spôsob vyučovania	5	10	5	ako sme chceli	10	programoval	yes	programoval hry	yes	yes	yes	yes	yes	yes	yes	yes	3	no	yes	5	5	very much enjoyed	not amused at all	very much enjoyed				yes	probably yes	no	probably yes			nič	no	4	probably yes	probably yes	yes		no
Stredná odborná škola technická	girl		aynol	2	6	54	ano	8	daasa	rather no	no	no	yes	yes	yes	rather yes	rather yes	rather yes	rather yes	5	rather yes	yes	5	4	very much enjoyed	not amused at all	very much enjoyed				no	yes	no	yes			bolo dobre haha xd <3	no	5	yes	yes	no		yes
Gymnázium Ľ. Štúra	girl		I don't know	1	1	39	no tak my sme nemohli takze som nahnevany	1	hral som tiež hry ale iba hacknute	yes	hladal hacknute hry	ale piču	fuuu	Ek drink die hele skool, want dit is 'n tegnose tegnok	你吃了我的雞巴	no	no	no	no	0	rather no	no	3	5	not amused at all	not amused at all	not amused at all				probably yes
Gymnázium M. Rúfusa	girl		dobré	3	6	4	náhodného výberu	10	programovala	yes	robila som s arduinom	rather yes	rather no	rather yes	rather no	yes	rather yes	rather no	yes	3	rather yes	rather yes	4	4	had a little fun	had a little fun	had a little fun				rather no	rather no	rather no	rather no			probably no	rather no	4	rather no	rather no	rather no		rather yes
Gymnázium M. Rúfusa	girl		moderne techniky	3	6	4	nahodny vyber	10	programovano	yes	I don't know	rather yes	I don't know	yes	I don't know	yes	rather yes	no	yes	3	rather yes	rather yes	3	3	had a little fun	had a little fun	very much enjoyed				yes	yes	no	yes			no	no	3	yes	yes	yes		rather yes
Gymnázium M. Rúfusa	girl		forma vyučovania	4	8	4	náhoda	10	dizajn	yes	no	rather yes	rather yes	rather yes	rather yes	rather yes	rather yes	rather yes	rather yes	4	rather yes	yes	5	5	very much enjoyed	very much enjoyed	very much enjoyed				yes	yes	yes	yes			ste super	probably yes	5	yes	yes	yes		rather yes
Gymnázium M. Rúfusa	girl		Pán Vostinar nás neucil obycajnym spôsobom, ale väčšinou nás nechal pracovať samich	3	8	4	Náhodné	9	Otázky a trochu programovania	rather yes	Vytvárano aplikacii	yes	no	rather yes	rather yes	yes	rather yes	rather yes	yes	5	rather yes	rather yes	4	3	had a little fun	had a little fun	very much enjoyed				yes	yes	yes	yes			Takého učiteľa by som si nechala na učeno....	yes	3	yes	yes	yes		rather yes
Gymnázium M. Rúfusa	girl		pán profesor nás neučil typickým spôsobom, ale väčšinou sme pracovali sami	4	7	4	náhodne	9	otázky a trochu programovano	yes	vytvárano aplikácie	yes	rather no	yes	rather yes	yes	yes				rather yes	rather yes	3	3							probably yes	probably yes
Gymnázium M. Rúfusa	girl		forma výučby	3	7	4	prinútili nás	8	trochu zo všetkého	rather yes	create app aplikácie	rather yes	rather yes	rather yes	rather no	rather yes	yes	yes	yes	1	rather no	rather yes	5	4	had a little fun	not amused at all	had a little fun				probably yes	yes	probably yes	yes			I don't know	probably yes	4	yes	yes	probably yes		rather no
Gymnázium M. Rúfusa	girl		I don't know	3	6	4	vedomostí	10	prečo otázky	yes	no	I don't know	rather yes	rather no	I don't know	rather no	rather no	no	rather yes	0	rather no	rather yes	2	2	not amused at all	not amused at all	not amused at all				rather no	rather no	rather no	rather no			nenechavajte nas tu s........	rather no	2	rather no	rather no	rather no		rather no
ZŠ Ďumbierska - IX.A	girl		nemám ani poňatia /metóda práce	1	1	3	náhodného výberu	10	apliácie,hry,rôzne internetové stránky atď...	yes	rôzne hry?	rather yes	rather yes	yes	rather no	no	rather yes	no	yes	0	rather no	rather yes	1	2	not amused at all	not amused at all	had a little fun	not amused at all	not amused at all	had a little fun	no	no	no	rather no	no	yes	XD
ZŠ Ďumbierska - IX.A	girl		probably yes. I don't know čo to je	2	2	yes, traja.	Tak ako sme sedeli	10	Nič, hľadala som obrázky na internete. Snažia som sa zapájať	yes	nič	rather yes	no	rather yes	yes	yes	rather no	no	rather yes	0	rather no	rather yes	1	2	not amused at all	not amused at all	not amused at all	not amused at all	had a little fun	not amused at all	no	no	no	no	no	rather no	:))
ZŠ Ďumbierska - IX.A	girl		Pracovano v tíme	1	1	Boli sme traja	vylosovali sme si mená	10	snažila som sa spolupracovať a otravovala som prívržníkov	yes	Vymýšľala rôzne veci inak	rather yes	no	určite yes ale not for me	no	yes	rather yes	no	yes	0	yes	yes	1	2	not amused at all	not amused at all	had a little fun	had a little fun	very much enjoyed	not amused at all	rather no	no	no	no	no	yes	všetko dobre
ZŠ Ďumbierska - IX.A	girl		pracovano v tíme	3	7	3	Losovali sme si papiere	10	Každý mal nejakú úlohu	yes	yes, napr. Microbit alebo Minecraft	I don't know, je to také diskutabilné.	no	yes	bežné vyučovano yes, lebo je to nočo iné a nové, na čo nemáme pripravené prostriedky	rather yes					rather yes	rather yes	3	3							probably yes	probably yes
ZŠ Ďumbierska - IX.B	girl		I don't know	3	3	3	nepamätám si	5	I don't know	yes	ano	rather yes	rather yes	rather yes	rather yes	rather yes	no	no	rather yes	1	rather yes	rather yes	2	2	not amused at all	not amused at all	had a little fun	had a little fun	not amused at all	not amused at all	rather no	rather no	rather no	rather no	rather no	rather no	no
ZŠ Ďumbierska - IX.B	girl		ano	2	2	3	Schopností	9	Všeličo	yes	ano vytvarala hry	rather yes	rather yes	rather yes	rather no	rather no	rather yes	no	yes	2	rather yes	rather yes	2	4	not amused at all	not amused at all	had a little fun	had a little fun	not amused at all	not amused at all	probably yes	probably yes
ZŠ Ďumbierska - IX.B	girl		iná forma učeniaNE	2	3	3	boli sme pri sebe	5	to čo som vedela	rather yes	nič kreatívne	rather yes	rather no	rather no	rather yes	rather no	rather yes	rather no	rather yes	2	yes	rather no	2	1	not amused at all	not amused at all	had a little fun	not amused at all	had a little fun	very much enjoyed	rather no	rather no	rather no	probably yes	rather no	rather no	no
ZŠ Ďumbierska - IX.B	girl		metóda učenia	2	3	4	na základe dotazníkov	5	vytvárala aplikáciu	rather no	vytvárali sme aplikácie a stránky	rather yes	rather yes	rather yes	rather no	rather no	rather yes	rather no	rather no	0	rather yes	rather no	2	2	not amused at all	not amused at all	not amused at all	not amused at all	not amused at all	had a little fun	rather no	no	no	no	no	probably yes	ani no
ZŠ Ďumbierska - IX.B	girl		metóda učenia	3	5	5	vlastností	5	všetko	yes	vymýšľali sme aplikáciu	rather yes	rather yes	rather yes	no	rather no	rather yes	no	rather yes	0	rather yes	rather yes	2	3	had a little fun	not amused at all	had a little fun	not amused at all	had a little fun	had a little fun	probably yes	rather no	no	rather no	rather no	probably yes	ani no
ZŠ Ďumbierska - IX.B	girl		uhuhuhuhuhuhuhuhuhuhuhuhuhuhuhuhuhuhuhuhuhuhuhuhuhuhuhuhuhuhuh	2	2	yes pracovala nás 4	Podľa Voštiho papierov :)	8	tvárila sa že nočo robím	rather yes	vytvárala stránky cez HTML	yes	rather no	yes	rather no	yes	yes	rather no	yes	2	yes	yes	4	3	had a little fun	had a little fun	very much enjoyed	had a little fun	very much enjoyed	not amused at all	rather no	rather no	rather no	probably yes	rather no	yes	have a nice dayyyyyyyyyyyyyyy :)
ZŠ Ďumbierska - IX.B	girl		Celkom fajn výučba	4	6	yes, boli 4	podľa dotazníka	4	Spolupracovala a pomáhala	rather yes	Robili sme aplikácie - kalkulačka a hra	yes	rather yes	rather yes	rather no	rather yes	yes	rather yes	rather yes	2	rather yes	rather no	3	2	had a little fun	not amused at all	had a little fun	had a little fun	very much enjoyed	not amused at all	probably yes	probably yes	rather no	probably yes	yes	yes	Dobre vyučoval
ZŠ Ďumbierska - IX.B	girl		metóda vyučovania	4	10	4	na základe vyplnených dotazníkov o našich vlastnostiach	9	vždy nočo iné.	rather yes	prezentácie	yes	rather yes	rather no	yes, ale v dobrom slova zmysle	rather no	yes	no	yes	3	yes	yes	5	2	very much enjoyed	had a little fun	very much enjoyed	not amused at all	very much enjoyed	not amused at all	yes	yes	probably yes	yes	rather no	yes	probably no.
ZŠ Ďumbierska - IX.B	girl		Forma učenia pomocou ktorej sme sa učili	3	7	4	Podľa papierov na zemi	8	pomáhal som	yes	Robili sme rôzne aplikácie	rather yes	yes	yes	rather yes	rather yes	yes	rather yes	yes	0	rather yes	rather yes	3	4	had a little fun	not amused at all	had a little fun	not amused at all	not amused at all	very much enjoyed	probably yes	rather no	no	rather no	rather no	rather no	Ďakujeme za super hodiny
ZŠ Ďumbierska - IX.B	girl		I don't know , pracovano na počítači	2	3	fuh probably 3-4 sme boli	podľa osobnosti človeka	6	kedže I don't know tieto veci a ani ma to nejako nebaví , no som v tom vôbec zručná snažila som sa aspoň trochu pomáhať	rather yes	vytvorila som si vlastnú stránku	I don't know možno	rather no	rather yes	no	rather no	rather yes	no	rather yes	0	yes	rather yes	2	2	not amused at all	not amused at all	not amused at all	not amused at all	not amused at all	had a little fun	rather no	rather no	no	no	no	no	prepáčte , mojimi odpovedami som Vás nechcela nijako uraziť ani nič , ale mňa osobne informatika nebaví. Nikdy som k tomu nemala vzťah a pochybujem že nokedy aj mať budem. Učili ste ale fajn , len mňa to nezaujalo.
Gymnázium Ľ. Štúra	girl	eight-year grammar school kvarta	systém vyučovania, práca v skupinách	3	5	3	na základe kamarátskych vzťahov	8	projekt, prezentácia	rather no	vytvárali sme nový kód samostatne	rather yes	rather yes	rather yes	rather yes	no	rather no	no	rather no	2	no	rather no	1	2	not amused at all	not amused at all	not amused at all	not amused at all	very much enjoyed	not amused at all	probably yes	no	no	no	rather no	yes	bolo by super, ak by nám pán lektor vedel viac pomôcť:)
Gymnázium Ľ. Štúra	girl	eight-year grammar school kvarta	systém vyučovania	2	2	3	ako prišlo	7	kód aj prezentáciu	yes	yes vymýšľala som nápad na hru	rather yes	no	yes	rather yes	yes					rather yes	rather yes	3	3							probably yes	probably yes
Gymnázium Ľ. Štúra	girl	eight-year grammar school kvarta	systém vyučovania	4	5	3	podľa náhodného výberu, podľa sympatií	8	skoro všetko	yes	nahrávali sme zvuky zvierat	rather yes	rather yes	yes	rather no	rather yes	rather no	rather no			rather yes	rather yes	3	3							probably yes	probably yes
Gymnázium Ľ. Štúra	girl	eight-year grammar school kvarta	Systém vyučovania	3	7	1	Bola by som príliš veľká pomoc proti ostatným	10	Kodovano, prezentaciu	yes	Hry, ich rozne verzie a vylepšenia k nim	rather yes	rather yes	yes	Neutrálne	rather yes	yes				rather yes	rather yes	3	3							probably yes	probably yes
Gymnázium Ľ. Štúra	girl	eight-year grammar school kvarta	je to tímová práca na programovaní, štýl učenia	3	7	traja	náhoda	9	kód, prezentáciu	rather yes	vymýšľali sme hru a aplikáciu	rather yes	rather yes	rather yes	rather no	rather yes	rather yes	rather yes	rather yes		rather no	rather yes	2	3	had a little fun		had a little fun	had a little fun			probably yes	rather no					no
Gymnázium Ľ. Štúra	girl	eight-year grammar school kvarta	systém vyučovania v skupinách bez nejakého veľkého vysvetlenia učiteľom	3	5	4	na základe pocitu	9	z každého (kód, prezentácia) trochu	rather yes	vymýšľala aplikáciu	rather no	rather yes	rather yes	rather no	rather no	rather yes	rather no	yes	3	rather no	rather yes	2	3	not amused at all	had a little fun	very much enjoyed	had a little fun	had a little fun	had a little fun	probably yes	rather no	no	probably yes	rather no	no	probably no
Gymnázium Ľ. Štúra	girl	eight-year grammar school kvarta	systém vyučovania	3	5	3	podla kamaratov	10	kódy	rather yes	ano	rather yes	I don't know	rather yes	I don't know sa vyjadriť	yes	rather yes	no	rather yes		rather yes	rather yes	3	2	very much enjoyed			had a little fun			probably yes	probably yes					no
Gymnázium Ľ. Štúra	girl	eight-year grammar school kvarta	yes, je to forma výučby v skupinách.	3	6	yes, boli sme 4.	Na základe náhody.	9	Z každej časti nočo.	rather yes	yes, vytvárala vlastnú aplikáciu a hru.	rather no	rather yes	yes	rather no	rather no	rather yes	rather no	yes	3	rather yes	rather no	2	3	not amused at all	had a little fun	very much enjoyed	very much enjoyed	had a little fun	had a little fun	probably yes	rather no	no	no	yes	no	Do skorého videnia!
Gymnázium Ľ. Štúra	girl	eight-year grammar school kvarta	systém vyučovania	3	4	v prvom 2 v druhom 3	najskôr nás rozdelil učiteľ potom sme sa rozhodli sami	10	všetko sme robili spolu	rather yes	vymýšľala som odpovede na otázky alebo akú hru ideme vytvoriť	rather yes	I don't know	rather yes	I don't know sa vyjadriť	yes	rather yes	no	yes	0	rather yes	rather yes	3	2	very much enjoyed	not amused at all	not amused at all	had a little fun	not amused at all	not amused at all	probably yes	probably yes	no	no	rather no	no	no
Gymnázium M. Rúfusa	girl		Typ výučby	5	9	4	Podľa našich vlastností	9	Aplikácie, hry	yes	Prezentácie, stránku projektu, vlastné mobilné aplikácie	yes	yes	yes	yes	yes	rather yes	rather yes	yes	2	rather no	yes	5	5	very much enjoyed	we didn't do it with him	had a little fun	had a little fun	we didn't do it with him	had a little fun	yes	yes	I don't know, nerobil som	yes	yes	I don't know, nerobil som
Gymnázium M. Rúfusa	girl		Metoda vyucby	4	7	4	Podla papierov od ucitela	8	Teoriu a programovano	rather yes		yes	yes	rather yes	rather yes	yes	rather yes	yes	yes	2	no	yes	5	4	very much enjoyed	we didn't do it with him	very much enjoyed	very much enjoyed	we didn't do it with him	had a little fun	yes	yes	I don't know, nerobil som	yes	yes	I don't know, nerobil som
Gymnázium M. Rúfusa	girl		Metóda výučby	4	7	4	Kvality a schopnosti	8	Zabavu, programovano	rather yes	Grafiku aplikacie	yes	yes	rather yes	yes	rather yes	rather yes	rather yes	yes	1	no	yes	4	4	very much enjoyed	we didn't do it with him	very much enjoyed	very much enjoyed	we didn't do it with him	had a little fun	probably yes	probably yes	I don't know, nerobil som	probably yes	probably yes	I don't know, nerobil som
Gymnázium M. Rúfusa	girl		Praca v time, prezentacia cielov, speinty…	4	8	4	Kvality - papier	9	Aplikáciu, stránku	rather yes		rather yes	yes	rather yes	rather yes	yes	yes	rather yes	yes	1	yes	yes	4	4	very much enjoyed	we didn't do it with him	very much enjoyed	very much enjoyed	we didn't do it with him	had a little fun	probably yes	probably yes	I don't know, nerobil som	probably yes	probably yes	I don't know, nerobil som
Gymnázium M. Rúfusa	girl		Metóda výučby	4	9	4	Papiere od učiteľa	9	Na vsetkom som spolopracovala	rather yes		yes	yes	yes	yes	yes	yes	yes	yes	0	no	yes	4	4	very much enjoyed	we didn't do it with him	very much enjoyed	very much enjoyed	we didn't do it with him	had a little fun	yes	yes	I don't know, nerobil som	yes	yes	I don't know, nerobil som
Gymnázium M. Rúfusa	girl		Výučba v tíme	4	8	4	Podľa vyplnených papierov o našich schopnostiach	9	Aplikácie a hry	yes		yes	yes	yes	yes	yes	yes	rather yes	yes	1	no	yes	5	4	very much enjoyed	we didn't do it with him	had a little fun	very much enjoyed	we didn't do it with him	had a little fun	yes	yes	I don't know, nerobil som	probably yes	yes	I don't know, nerobil som
Gymnázium M. Rúfusa	girl		Metóda vyučovania	5	6	4	Schopnosti - anonymnym vyberom	9	Prezentácie, stránku, aplikáciu	rather yes		yes	yes	yes	rather yes	yes	rather yes	rather no	yes	2	rather yes	yes	5	4	very much enjoyed	we didn't do it with him	had a little fun	very much enjoyed	we didn't do it with him	had a little fun	probably yes	probably yes	I don't know, nerobil som	probably yes	probably yes	I don't know, nerobil som
Gymnázium M. Rúfusa	girl		Výučba	4	8	4	Kvalit a schopnosti	8	Vsetko	rather yes	Vsetko bolo kreativne	yes	yes	rather yes	yes	yes	rather yes	yes	yes	2	yes	yes	5	4	very much enjoyed	we didn't do it with him	had a little fun	had a little fun	we didn't do it with him	had a little fun	probably yes	probably yes		probably yes	probably yes	I don't know, nerobil som
Gymnázium M. Rúfusa	girl		Forma výučby	5	8	4	Našich schopností	8	Aplikácie	yes		yes	yes	yes	yes	yes	yes	yes	yes	1	no	rather yes	5	3	very much enjoyed	we didn't do it with him	very much enjoyed	very much enjoyed	we didn't do it with him	very much enjoyed	yes	yes	I don't know, nerobil som	yes	yes	I don't know, nerobil som
Gymnázium M. Rúfusa	girl		Formy výučby	5	10	3	Kvalit a schopnosti	9	Aplikaciu, otázky, prezentáciu	yes		yes	yes	yes	yes	yes	yes	yes	yes	4	no	yes	5	4	very much enjoyed	we didn't do it with him	very much enjoyed	very much enjoyed	we didn't do it with him	not amused at all	yes	yes	I don't know, nerobil som	yes	yes	I don't know, nerobil som
Gymnázium M. Rúfusa	girl		Metóda vyučovania	5	9	3	Podľa vyplnených papierov na začiatku roka	9	Zo všetkého trošku :)	yes		yes	yes	yes	yes	yes	rather yes	rather no	yes	2	rather yes	rather yes	4	4	very much enjoyed	we didn't do it with him	very much enjoyed	very much enjoyed	we didn't do it with him	had a little fun	yes	yes	I don't know, nerobil som	yes	yes	I don't know, nerobil som
Gymnázium M. Rúfusa	girl		Vyčovano v tímoch	5	10	3	V úvode roka	9	Stále nočo	rather yes		rather yes	rather yes	rather yes	yes	yes	yes	yes	yes	2	rather yes	yes	5	4	very much enjoyed	we didn't do it with him	had a little fun	very much enjoyed	we didn't do it with him	had a little fun	probably yes	probably yes	I don't know, nerobil som	probably yes	probably yes	I don't know, nerobil som
Gymnázium M. Rúfusa	girl		Vyučovano odborníkom z praxe	4	8	4	V uvode nejaky papierik sme vyplnali	10	Zo vsetkeho noco	yes		yes	yes	yes	yes	yes	rather yes	rather no	yes	1	rather yes	rather yes	5	4	very much enjoyed	we didn't do it with him	very much enjoyed	very much enjoyed	we didn't do it with him	very much enjoyed	yes	probably yes	I don't know, nerobil som	probably yes	probably yes	I don't know, nerobil som
Gymnázium Ľ. Štúra	girl	eight-year grammar school kvarta	forma výučby	5	9	4	dokument od učiteľa	9	čo bolo treba	yes	stále nočo	yes	yes	rather yes	yes	yes	yes	yes	yes	4	yes	yes	5	5	very much enjoyed	we didn't do it with him	very much enjoyed	very much enjoyed	we didn't do it with him	very much enjoyed	yes	yes	I don't know, nerobil som	probably yes	yes	I don't know, nerobil som
Gymnázium M. Rúfusa	girl		to ako, sme sa učili - skupiny, úlohy, prezentácie...	5	8	3.4	podľa kvalít a schopností	10	všetci sme nočo robili	yes		yes	yes	yes	yes	yes	yes	yes	yes	4	yes	yes	5	5	very much enjoyed	we didn't do it with him	very much enjoyed	very much enjoyed	we didn't do it with him	very much enjoyed	yes	yes	I don't know, nerobil som	yes	yes	I don't know, nerobil som
Gymnázium M. Rúfusa	girl		učiteľ neprednáša, iba nás vedie a pomáha	5	9	4	Vzdy si styria ludia vyberali tím, nahodne cez papieriky	9	scrum mastera, logika aplikácií	yes	Vymýšľano aplikácii a zaujímavých nápadov.	yes	yes	yes	yes	yes	yes	rather yes	rather yes	4	rather yes	yes	5	4	very much enjoyed	we didn't do it with him	very much enjoyed	very much enjoyed	we didn't do it with him	very much enjoyed	yes	yes	I don't know, nerobil som	probably yes	probably yes	I don't know, nerobil som
Gymnázium M. Rúfusa	girl		spôsob ako sme sa učili	4	7	štyria	kamarátstvo, predtým na základe takého papiera	10	vypracovával otázky a robil na úlohách	yes	vymýšľal o čom budú aplikácie/hry	yes	yes	yes	yes	rather yes	rather yes	rather yes	rather yes	3	yes	yes	5	5	very much enjoyed	we didn't do it with him	very much enjoyed	very much enjoyed	we didn't do it with him	very much enjoyed	probably yes	probably yes
Gymnázium M. Rúfusa	girl		to ako sme sa učili - učiteľ pomáhal a nevysveľoval	5	10	4	kamarátstva, schopností	9	robila som prezentácie, vypracovávala otázky, programovalova	yes	programovalova	yes	yes	yes	yes	rather yes	rather yes	rather yes	rather yes	3	yes	yes	5	3	had a little fun	we didn't do it with him	had a little fun	very much enjoyed	we didn't do it with him	had a little fun	probably yes	probably yes	I don't know, nerobil som	probably yes	probably yes	I don't know, nerobil som
Gymnázium M. Rúfusa	girl		spôsob akým sme sa učili	3	6	4	papiere od učitela	9	aplikácie	rather yes	stále nočo	rather yes	rather yes	rather yes	rather yes	rather yes	rather yes	rather yes	rather yes	3	yes	yes	4	3	very much enjoyed	we didn't do it with him	had a little fun	had a little fun	we didn't do it with him	had a little fun	probably yes	probably yes	I don't know, nerobil som	probably yes	probably yes	I don't know, nerobil som
Gymnázium M. Rúfusa	girl		to ako sme sa učili	3	8	4	učiteľ nás rozdelil podľa vyplnených papierov	8	prezentácie, aplikácie	rather yes	všetko bolo kreatívne	rather yes	rather yes	rather yes	rather yes	rather yes	rather yes	rather yes	rather yes	3	yes	yes	4	3	very much enjoyed	we didn't do it with him	very much enjoyed	had a little fun	we didn't do it with him	had a little fun	probably yes	probably yes	I don't know, nerobil som	probably yes	probably yes	I don't know, nerobil som
Gymnázium M. Rúfusa	girl		forma výučby	3	6	4	podľa učiteľa	8	aplikácie	rather yes		yes	yes	yes	yes	yes	yes	yes	yes	3	rather yes	yes	4	4	very much enjoyed	we didn't do it with him	had a little fun	very much enjoyed	we didn't do it with him	had a little fun	probably yes	probably yes	I don't know, nerobil som	probably yes	probably yes	I don't know, nerobil som
Gymnázium M. Rúfusa	girl		spôsob výučby	4	8	4	podľa vyplnených schopností - papiera od učiteľa	9	hry, prezentácie, prečo otázky	yes	hry, prezentácie, prečo otázky	yes	yes	yes	yes	rather yes	rather yes	rather yes	rather yes	4	yes	yes	4	3	had a little fun	we didn't do it with him	very much enjoyed	very much enjoyed	we didn't do it with him	had a little fun	probably yes	probably yes	I don't know, nerobil som	yes	yes	I don't know, nerobil som
Gymnázium M. Rúfusa	girl		spôsob výučby	3	7	4	papiere od učiteľa	8	všetko, čo bolo treba	yes	celé to bolo kreatívne	yes	yes	yes	rather yes	yes	yes	rather yes	yes	2	rather yes	yes	4	3	very much enjoyed	we didn't do it with him	very much enjoyed	very much enjoyed	we didn't do it with him	very much enjoyed	probably yes	probably yes	I don't know, nerobil som	probably yes	probably yes	I don't know, nerobil som
Gymnázium M. Rúfusa	girl		forma výučby	3	7	4	kvality a schopnosti - dokument	9	všetci sme robili všetko	yes	nápady na hru/aplikáciu, dizajn	yes	yes	yes	yes	rather yes	rather yes	rather yes	rather yes	3	yes	yes	4	4	very much enjoyed	we didn't do it with him	very much enjoyed	very much enjoyed	we didn't do it with him	very much enjoyed	probably yes	probably yes	I don't know, nerobil som	probably yes	probably yes	I don't know, nerobil som
Gymnázium M. Rúfusa	girl		vyučovano v skupinách	4	8	4	papier od učiteľa	8	aplikácie	rather yes		yes	yes	yes	yes	yes	yes	rather yes	yes	2	yes	yes	3	3	had a little fun	we didn't do it with him	had a little fun	had a little fun	we didn't do it with him	had a little fun	probably yes	probably yes	I don't know, nerobil som	probably yes	probably yes	I don't know, nerobil som
Gymnázium Ľ. Štúra	girl	eight-year grammar school kvarta	metóda výučby	4	9	4	kvality a schopnosti - papier	9	aplikácie	yes	všetko bolo kreatívne	yes	yes	yes	yes	yes	yes	yes	yes	3	yes	rather yes	4	4	very much enjoyed	we didn't do it with him	we didn't do it with him	very much enjoyed	we didn't do it with him	we didn't do it with him	yes	yes	I don't know, nerobil som	I don't know, nerobil som	yes	I don't know, nerobil som
Gymnázium Ľ. Štúra	girl	eight-year grammar school kvarta	forma výučby	3	7	4	papier od učiteľa, ktorý sme vypĺňali	8	prezentácia, prečo otázky, morálna podpora	rather yes	vymýšľala som nápady	rather yes	rather yes	rather yes	rather yes	rather yes	rather yes	rather no	rather yes	2	yes	rather yes	3	3	had a little fun	we didn't do it with him	we didn't do it with him	had a little fun	we didn't do it with him	we didn't do it with him	probably yes	probably yes	I don't know, nerobil som	I don't know, nerobil som	probably yes	I don't know, nerobil som
Gymnázium Ľ. Štúra	girl	eight-year grammar school kvarta	samoštúdium podľa seba	3	6	4	papier od učiteľa	9	čo bolo treba	yes		rather yes	rather yes	rather yes	rather yes	rather yes	rather yes	rather yes	rather yes	2	rather yes	rather yes	3	3	had a little fun	we didn't do it with him	we didn't do it with him	had a little fun	we didn't do it with him	we didn't do it with him	probably yes	probably yes	I don't know, nerobil som	I don't know, nerobil som	probably yes	I don't know, nerobil som
Gymnázium Ľ. Štúra	girl	eight-year grammar school kvarta	výučba v tímoch	3	6	4	papier od učiteľa	8	prečo otázky, prezentácie	rather yes		rather yes	rather yes	rather yes	yes	yes	rather yes	rather yes	yes	2	yes	rather yes	3	3	had a little fun	had a little fun	we didn't do it with him	very much enjoyed	we didn't do it with him	we didn't do it with him	probably yes	probably yes	I don't know, nerobil som	I don't know, nerobil som	yes	I don't know, nerobil som
Gymnázium Ľ. Štúra	girl	eight-year grammar school kvarta	iná forma vyučovania	3	7	4	učiteľ nás rozdelil na základe vyplnených papierov	9	prezentáciu a prečo otázky	rather yes		yes	yes	yes	yes	yes	rather yes	rather yes	yes	2	yes	yes	3	4	very much enjoyed	we didn't do it with him	we didn't do it with him	very much enjoyed	we didn't do it with him	we didn't do it with him	probably yes	probably yes	I don't know, nerobil som	I don't know, nerobil som	probably yes	I don't know, nerobil som
Gymnázium Ľ. Štúra	girl	eight-year grammar school kvarta	forma výučby	3	6	4	papiere od učiteľa	9	aplikácie	yes		yes	yes	yes	yes	rather yes	rather yes	rather yes	rather yes	2	rather yes	rather yes	3	3	had a little fun	we didn't do it with him	we didn't do it with him	very much enjoyed	we didn't do it with him	we didn't do it with him	probably yes	probably yes	I don't know, nerobil som	I don't know, nerobil som	probably yes	I don't know, nerobil som
Gymnázium Ľ. Štúra	girl	eight-year grammar school kvarta	forma výučby	3	8	4	papiere od učiteľa	8	prezentáciu, prečo otázky, programovano	rather yes		rather yes	rather yes	rather yes	rather yes	yes	rather yes	rather yes	yes	2	rather yes	yes	3	3	very much enjoyed	we didn't do it with him	we didn't do it with him	had a little fun	we didn't do it with him	we didn't do it with him	probably yes	probably yes	I don't know, nerobil som	I don't know, nerobil som	probably yes	I don't know, nerobil som
Gymnázium M. Rúfusa	boy		eduScrum je forma učenia v skupinách, ktorá nám prinosla nové zážitky a skúsenosti z oblasti IT. Pracovali sme v teamoch.	3	8	Záležalo na výbere tímu. Ale buď 3 alebo 4	Vyberali sme si postupne ľudí do tímu	8	V každom jednom šprinte som urobil to, na čom sme sa dohodli. Väčšinou to bola hra	rather yes	Väčšinou som robil to, čo už dávno je. Učil som sa	rather yes	yes	yes	rather yes	yes	yes	yes	rather yes	2	rather no	yes	4	3	very much enjoyed	not amused at all	very much enjoyed				probably yes	yes	rather no	yes			Dobrá práca :)	rather no	3	yes	yes	probably yes	8	rather no
Gymnázium M. Rúfusa	boy		Je to forma vyučovania, pri ktorej každý pracuje na vlastnom projekte, a pri tom si rozdelí úlohy tak, aby dokázal vyriešiť určitý problém	4	7	3 až 4	Na začiatku vyberal kapitán, neskôr náhodne	3	snažil som sa najviac zapojiť do vymýšľania aplikácie, neskôr urobiť svoj podiel na práci	rather yes	no	rather yes	yes	yes	rather no	rather yes	yes	rather yes	rather no	0	rather no	rather yes	4	5	very much enjoyed	had a little fun	not amused at all				probably yes	probably yes	probably yes	rather no			V tom Inkognite si bol celkom frajer	yes	5	no	probably yes	probably yes	7	rather no
Gymnázium M. Rúfusa	boy		Práca v skupinách pod vedením scrum mastra	4	8	3.4	Vlastný výber/losovaním	7	Aj scrum mastra, väčšinou som pracoval na logike aplikácii	rather yes	Aplikácie :)	yes	yes	yes	rather no	rather yes	yes	yes	rather yes	3	rather no	rather yes	4	4	very much enjoyed	very much enjoyed	had a little fun				probably yes	probably yes	yes	probably yes			Dobrá práca :D	yes	4	probably yes	probably yes	probably yes	7	no
Gymnázium M. Rúfusa	boy		Ano, eduScrum je forma ucenia v ktorej pracujeme ako jeden tym a pomahame si navzajom ked noco I don't knowe	5	10	Ano pracoval. Boli sme 4	Na zaklade vyberu nokoho kto si ptm vyberal ostatnych	10	Vzdy noco ine	yes	Aj hej aj no	yes	yes	rather yes	rather yes	yes	yes	yes	yes	3	rather yes	rather yes	1	4	had a little fun	very much enjoyed	very much enjoyed				probably yes	rather no	probably yes	probably yes			Bolo to urcite ine ako normalne hodiny a vies hlavne pomoct ked mame niaky problem alebo nam noco nejde	probably yes	4	probably yes	rather no	probably yes	10	rather yes
Gymnázium M. Rúfusa	boy		Forma učenia kde sa žiaci prerozdelila do tímov a snažia sa pracovať ako v korporátnych firmách na úlohe ktorá im je zadaná	3	8	3.4	Určil sa vždy scrum master pre skupinu a ten si vyberal spomedzi ostatných koho chce	8	Záleží na tom aku úlohu som dostal robil som aj grafické rozhrano aj softvér aplikácie	rather yes	Vymýšľal sme nové aplikácie alebo sa snažili zdokonaliť už existujúce.	rather yes	yes	yes	rather yes	rather yes	yes	yes	yes	2	rather no	yes	4	4	very much enjoyed	very much enjoyed	very much enjoyed				probably yes	probably yes	yes	yes			Je to frajer	yes	4	yes	probably yes	probably yes	8	rather no
Gymnázium M. Rúfusa	boy		Forma učenia pri ktorej daná osoba vedie hodinu podľa určitých plyesv	3	8	Boli sme štyria	Na základe výberu scrum mastera	8	Odpoveď na otázky a vytvoreno svojej aplikácie alebo časti spoločnej	rather yes	Skôr som pracoval doma, na hodinách som sa venoval vzdelávaniu v nových prostrediach	rather yes	yes	yes	rather no	yes	yes	yes	yes	3	rather yes	yes	4	3	had a little fun	had a little fun	had a little fun				probably yes	probably yes	rather no	probably yes			no
Gymnázium M. Rúfusa	boy		Je to vzdelávano na ktorom sa pracuje spolu v skupinách. Je vybraný líder skupiny, ktorý rozdeľuje úlohy.	3	9	V jednom tíme sme boli 4 členovia	Zo začiatku sme si zvolili lídra a ten si ďalej volil svojich členov	9	Snazil som sa splniť vsetky ulohy	yes	Na hodinách som sa prevažne snažil len nájsť inšpiráciu a porozumieť problematike ale na projekte som robil ďalej doma	rather yes	yes	yes	rather yes	rather yes	rather yes	rather yes	yes	2	no	rather yes	4	4	very much enjoyed	not amused at all	very much enjoyed				probably yes	yes	rather no	yes			Super	rather no	4	yes	yes	probably yes	9	no
Gymnázium M. Rúfusa	boy		Je to forma výučby zameraná na prácu v tíme. Študenti sa učia prostredníctvom vlastných chýb a projektov.	2	4	4,3,3,2	Na základe náhodnosti.	8	Zakaždým nočo inšio. Rozdelili sme si úlohy, ktoré sa menili.	rather no	Moja práca na hodinách bolo z väčšej časti kreatívna a to rôznymi spôsobmi.	yes	yes	yes	rather yes	yes	rather yes	rather no	yes	3	rather no	no	3	4	had a little fun	very much enjoyed	not amused at all				rather no	no	yes	no			10 001 000 110 111 100 000 000 000 000 000 000 000 000 000 000 000 000 000 000 000 000 000 000 000 000 000 000 000 000 000 000 000 000 000 000 000 000 000 000 000 000 000 000 000 000 000 000 000 000 000 000 000 000 000 000 000 000 000 000 000 000 000 000	yes	4	no	no	rather no	4	rather no
Gymnázium M. Rúfusa	boy		Jedinečná príležitosť zažiť skúsenosť skupinovej práce a vlastného riadenia štúdia.	4	7	4	Ako kedy. Väčšinou demokraticky. Raz no.	7	programovano/dizajn/otázky podľa pridelených úloh v tíme	yes	yes. Vymýšľano aplikácii a zaujímavých nápadov.	rather yes	yes	yes	rather yes	rather yes	yes	rather yes	rather yes	0	no	rather yes	4	3	very much enjoyed	had a little fun	had a little fun				yes	rather no	probably yes	no			I. fáza (microbit + appinventor) bola super. Prechod do druhej je však dosť veľký skok, pre tých z nás, ktorí neprogramovali v Jave.	probably yes	3	no	rather no	yes	7	rather no
Gymnázium Ľ. Štúra	boy		Skvelý spôsob štúdia	4	7	6	Na základe dobrej komunikácii a dlhoročnej spolupráce členov tímu.	8	Prácu sme mali spravodlivo rozdelenú	yes	no	yes	yes	yes	no	yes	rather yes	rather yes	yes	3	rather no	yes	4	4	very much enjoyed	not amused at all	very much enjoyed				yes	probably yes	rather no	yes			no	rather no	4	yes	probably yes	yes	7	rather no
Gymnázium Ľ. Štúra	boy		učeno sa formou programovania aby sme mali skúsenosti ak by sme s tým chceli pokračovať	2	6	6	priateľstva	3	nič také konkrétne probably všetko	yes	grafiku a design na appku	rather yes	yes	yes	rather yes	yes	rather no	rather no	rather yes	0	yes	rather yes	4	1	very much enjoyed	not amused at all	very much enjoyed				rather no	probably yes	no	probably yes			si král	no	1	probably yes	probably yes	rather no	6	yes
Gymnázium Ľ. Štúra	boy		Forma učenia samostatne a rozvíjano kreativity a spolupráce	2	3	5	Viac menej náhodne	6	programovano	rather yes	vytváral nové aplikácie z hlavy	yes	rather yes	yes	yes	rather yes	yes	rather no	rather yes	1	rather no	rather yes	5	4	very much enjoyed	not amused at all	very much enjoyed				probably yes	yes	probably yes	yes			V AppInventor-e a MicroBit-e sa jednoducho tvoria aplikácie a človek tvorbu v nich dokážu pochopiť aj sami. Bohužiaľ Android Studio je veľmi zložité na pochopeno a učitelia od nás očakávali nočo nad naše sily. Problém aj bol že nedostatočné (v podstate žiadne) vysvetleno Android Studia budilo v nás iba chaos. Ak by som nočo zmenil tak jedine to aby EduScrum bol celý jeden rok - tým pádom mať viac…	probably yes	4	yes	yes	probably yes	3	rather no
Gymnázium Ľ. Štúra	boy		I don't know	3	5	5	sympatií	10	programoval, riešil otázky	rather yes	no	yes	yes	yes	rather no	yes	rather no	rather yes	rather yes	0	rather no	rather yes	3	3	had a little fun	had a little fun	very much enjoyed				probably yes	rather no	probably yes	rather no			no	probably yes	3	rather no	rather no	probably yes	5	rather no
Gymnázium Ľ. Štúra	boy		Forma vyučovania, kde sú študenti rozdelení do skupín a zvolia si vlastného človeka ktorý bude mať na starosti deleno úloh	1	1	6	Na základe dobrej komunikácii a dlhoročnej spolupráci členov tímu	1	Všeobecné, sle najmä programovano	no	Keďže som mal už znalosti programovania tak sa mi ľahšie dizajnovalo a vytváralo aplikácie a mohli byť lepšie	rather yes	yes	yes	Som za yes, ale je probably najdôležitejšie dobre zorganizovať tím, v opačnom prípade to nefunguje	rather no	yes	yes	rather no	4	no	rather no	1	5	had a little fun	very much enjoyed	very much enjoyed				probably yes	no	yes	yes			Keďže programovano je naozaj komplexné, ťažké a náročné na pochopeno je podľa mna veľmi zlé, keď sa to máme naučiť sami. A to nehovoriac o objektovo orientovanom. Podľa mňa metóda eduScram ma budúcnosť ale no úplne v programovaní, minimálne no pri úplných začiatkoch.	yes	5	yes	no	probably yes	1	no
Gymnázium Ľ. Štúra	boy		nočo ohľadom formy výučby v oblasti informatiky a programovania	1	4	yes pracoval som v 6 člennom tíme	na základe sympatií	7	snažil som sa pochopiť programovaniu a robil som na samotných aplikáciách ako som len vedel	yes	hrali sme hry (internete) súvisiace s programovaním a to ma bavilo najviac	rather yes	yes	rather yes	rather yes	rather yes	yes	rather no	yes	2	yes	rather yes	1	4	not amused at all	had a little fun	very much enjoyed				no	no	probably yes	yes			Ste fajn típek, trochu viac by bolo vysvetliť o programovaní čo a ako pri začiatkoch hlavne na prvých hodinách ale inak to bolo ok.	probably yes	4	yes	no	no	4	yes
Gymnázium Ľ. Štúra	boy		Vzdelávano bez pomoci učiteľa, v skupinách.	2	2	5	Boli sme voľní.	9	Opravára.	rather yes	Aplikácie	rather no	rather yes	rather no	yes	yes	no	no	rather no	0	yes	rather yes	2	1	not amused at all	had a little fun	had a little fun				no	no	no	no			Trochu viac pomoci by neuškodilo.	no	1	no	no	no	2	yes
Gymnázium Ľ. Štúra	boy		"Učeno" sa programovať	3	4	5	kamaráti	8	všetci sme robili spolu	yes	aplikácie	rather no	rather yes	rather yes	no	rather no	rather no	rather yes	rather yes	0	yes	no	1	1	had a little fun	had a little fun	had a little fun				no	no	probably yes	rather no			Myšlienka takejto výučby na hodine informatiky je dobrá, no realizácia sa mne a môjmu tímu nepáčila. Projekt nám bol predstavený s myšlienkou, že sa naučíme programovať a budeme si môcť spraviť vlastné aplikácie., ale hodiny vyzerali úplne inak. Rozdali nám papiere na ktorých boli úlohy a požiadavky, ktoré od nás chceli, lenže sme nemali žiadne znalosti, ako programovať a len sme odpisovali a kop…
Gymnázium Ľ. Štúra	boy		samostatná práca v skupinách	3	3	5	kamarátstvo	8	programoval a písal otázky	rather yes	skoro nič	rather yes	rather yes	yes	rather yes	yes	rather yes	rather no	yes	4	rather no	yes	4	3	had a little fun	not amused at all	very much enjoyed				rather no	probably yes	rather no	yes			Viac vysvetliť daný program, v ktorom sa programuje.	rather no	3	yes	probably yes	rather no	4	rather no
Gymnázium Ľ. Štúra	boy		Samostatná výučba	3	6	5	Tím sme tvorili ako skupina kamarátov	9	Programoval, riešil úlohy	rather yes	Aplikácie	rather yes	yes	yes	rather no	yes	rather no	rather no	rather yes	1	rather yes	rather yes	2	2	had a little fun	not amused at all	very much enjoyed				rather no	rather no	no	yes			Venovať väčšiu pozornosť žiakom, ktorí nevedia o programovaní vôbec nič ako ja. Aspoň vysvetliť úplne základné veci a popísať čo robia. Bolo ťažké sa to všetko naučiť zo všelijakých stryesk a pomerne často meneno programov na programovano.	no	2	yes	rather no	rather no	6	rather yes
Stredná odborná škola technická	boy		forma výučbi	2	7	5	priateľstva	8	tvoril aplikácie	rather yes	aplikácie	rather yes	yes	yes	I don't know	rather yes	rather yes	rather yes	rather yes	3	no	rather yes	3	2	had a little fun	not amused at all	not amused at all				rather no	no	no	no			Dovidenia	no	2	no	no	rather no		no
Stredná odborná škola technická	boy		Forma výučby	2	9	4	znalosti	8	Vytváral aplikáciu	rather yes	Vytvárano vlastnej aplikácie	yes	rather no	yes	rather no	rather yes	yes	rather yes	rather no	3	rather yes	no	2	4	very much enjoyed	had a little fun	had a little fun				yes	probably yes	rather no	rather no			drž sa	rather no	4	rather no	probably yes	yes		rather yes
Stredná odborná škola technická	boy		Forma výučby	3	8	5	Podľa losovania	8	Tvoril som aplikácie v appinventor alebo micro bit	rather yes	Rôzne aplikácie	rather yes	rather yes	yes	rather no	yes	yes	rather yes	rather yes	3	rather yes	yes	3	4	had a little fun	had a little fun	had a little fun				probably yes	rather no	yes	probably yes			.	yes	4	probably yes	rather no	probably yes		rather yes
Stredná odborná škola technická	boy		yes/Je to program na vychovu mladych ludi	3	10	4	na dobrych vztahoch	10	scrummastera	rather no	nič	rather yes	rather no	rather yes	rather no	rather no	rather yes	yes	no	0	no	rather yes	5	5	had a little fun	not amused at all	very much enjoyed				rather no	rather no	rather no	yes			Ľubim ho <3	yes	1	yes	yes	yes		yes
Stredná odborná škola technická	boy		Forma výučby	3	5	4	Náhody	7	Programoval	rather no	ano, aplikáie	I don't know	rather yes	rather yes	I don't know	rather yes	yes	no	rather no	0	no	rather yes	3	4	very much enjoyed	not amused at all	had a little fun				probably yes	rather no	no	no			no	no	4	no	rather no	probably yes		no
Stredná odborná škola technická	boy		ANO	5	8	5	Vedomosti	9	programoval aplikacie	rather no	no	rather yes	rather yes	yes	yes	rather yes	yes	rather yes	yes	0	rather no	yes	3	2	had a little fun	had a little fun	not amused at all				rather no	probably yes	probably yes	probably yes			zlepšiť spoluprácu	probably yes	2	probably yes	probably yes	rather no		rather no
Stredná odborná škola technická	boy		Je to forma výučby, ana učil som sa.	4	9	4	Náhoda	9	Aplikácie	yes	Ano, aplikácie had, kresleno, space invader	rather yes	rather yes	yes	I don't know	yes	yes	yes	yes	3	no	rather yes	4	5	had a little fun	very much enjoyed	had a little fun				probably yes	rather no	probably yes	rather no			Poznáte Vlada Voštinára?	probably yes	5	rather no	rather no	probably yes		no
Stredná odborná škola technická	boy		nwm	2	4	4	Kamoštva	8													rather yes	rather yes	3	3							probably yes	probably yes
Stredná odborná škola technická	boy		programovano	2	4	4	znalosti	5	programoval	rather yes	no	rather yes	rather no	rather yes	rather no	yes	rather yes	rather yes	rather yes	2	yes	no	1	3	had a little fun	not amused at all	had a little fun				yes	probably yes	probably yes	rather no			ste super	yes	2	probably yes	rather no	probably yes		yes
Stredná odborná škola technická	boy		dačo	2	8	5	na základe komunikácie	10	robil som troška	yes	robil som vlastnú appku, ale po chvíli ma to už nebavilo	rather yes	rather yes	rather yes	rather yes	rather yes					rather yes	rather yes	3	3							probably yes	probably yes
Stredná odborná škola technická	boy		dačo	2	8	5	na základe komunikácie	10	robil som troška	yes	robil som vlastnú appku, ale po chvíli ma to už nebavilo	rather yes	rather yes	rather yes	rather yes	rather yes					rather yes	rather yes	3	3							probably yes	probably yes
Stredná odborná škola technická	boy		forma výučby	3	10	5	vedomostí	10	scram Master	rather yes	kalkulačka, pong ball, piano	yes	rather yes	rather yes	rather no	rather yes	yes	rather yes	yes	4	rather yes	yes	5	4	had a little fun	had a little fun	had a little fun				probably yes	probably yes	probably yes	probably yes			dokonalý učiteľ	probably yes	4	probably yes	probably yes	probably yes		rather yes
Stredná odborná škola technická	boy		yes/učiť sa v programovaní	3	5	4	Na základe lásky	10	kalkulačku,hru,skicár	rather yes	no	rather yes	rather no	yes	rather no	rather yes	rather no	no	yes	0	no	rather yes	3	3	had a little fun	not amused at all	very much enjoyed				rather no	rather no	rather no	yes			Máš peknú skoda octaviu	rather no	3	yes	rather no	rather no		no
Gymnázium M. Rúfusa	boy		Práca v týmoch, striedano leadra tímu.	4	8	4	Kapitáni si volili svojich členov	10	programoval	rather yes	vymýšľal aplikáciu	yes	yes	yes	rather yes	yes	rather yes	yes			rather yes	rather yes	3	3							probably yes	probably yes
Gymnázium M. Rúfusa	boy		Aplikovano fungovania cechu, čo je produktívne.	4	9	4	Na základe podmienok, ktoré určili vyučujúci.	8	Koordinoval som názory.	yes	Riešenia.	yes	yes	yes	Závisieť to môže od vyučovacieho priebehu, ktorého činiteľm sú práve vzdelávaní - študenti.	yes	yes	no	yes		rather yes	rather yes	3	3							probably yes	probably yes
Základná škola	boy		ale cau	3	9	5	kupujte ale cau merch	1	vsetko oni sa len pozeerali	yes	urobil som hru	rather yes	I don't know	yes	rather no	yes	rather yes	yes	yes	3	rather no	yes	5	4	very much enjoyed	had a little fun	very much enjoyed				no	yes	no	yes			use code ADAMKOSS10	no	4	yes	yes	no		rather no
Základná škola	boy		I don't know ale cau	3	5	jop boli sme cca 5.5	random	8													rather yes	rather yes	3	3							probably yes	probably yes
Základná škola	boy		I don't know	3	8	yes. 5	kamaráti	10	hru	rather yes	Psychickú podporu	yes	rather yes	yes	I don't know	yes	yes	yes	yes	3	rather yes	yes	5	3	very much enjoyed	very much enjoyed	very much enjoyed				yes	yes	yes	yes			Pokračujte v tom čo robíte	yes	3	yes	yes	yes		rather yes
Základná škola	boy		forma výučby	4	7	5	girltá si vyberali členov	4	všetko	yes	Programoval som	yes	rather yes	yes	rather no	rather yes	yes	yes	rather yes	1	rather yes	rather yes	5	5	very much enjoyed	not amused at all	had a little fun				probably yes	yes	rather no	probably yes			Bolo to celkom zaujímavé , hlavne ten appinventor PS: Sub2Pewdiepie	rather no	5	probably yes	yes	probably yes		rather yes
Základná škola	boy		Forma výučby , mozme si samy vytvarat aplikacie	3	8	3	Na základe dobrovoľnej voľby	4	Skoro všetko	yes	Robil vlastnú hru	yes	yes	rather no	rather no	yes	yes	rather yes	yes	1	yes	yes	3	5	had a little fun	not amused at all	very much enjoyed				yes	yes	no	yes			Bavia ma vaše hodiny	no	5	yes	yes	yes		yes
Základná škola	boy		Forma výučby	4	9	5	Spolužiačky vyberali členov	8	Pracoval som so svojím spolužiakom	yes	Programovano	rather yes	yes	yes	rather yes	yes	rather yes	yes	yes	2	rather yes	yes	5	3	very much enjoyed	had a little fun	very much enjoyed				probably yes	probably yes	rather no	probably yes			Bolo to super lebo som si mohol vyskúšať nočo iné len ako písať vo Worde.	rather no	3	probably yes	probably yes	probably yes		rather yes
Základná škola	boy		Pestrejšie vyučovano informatiky	4	7	4	random	10	hlavnú pozíciu	rather yes	Skúšal som vztvoriť nejaku game ale stále sa učím	rather yes	yes	yes	rather yes	rather yes	rather yes	yes			rather yes	rather yes	3	3							probably yes	probably yes
Základná škola	boy		Ci vitrtkam mamu ci boa	3	9	4	Partia	10	Väčšinou veľa vecí	rather yes	už si nepamätám	yes	rather yes	rather yes	rather yes	yes	rather yes	rather yes	rather yes	1	rather yes	yes	4	3	very much enjoyed	had a little fun	had a little fun				probably yes	probably yes	rather no	probably yes			diki jožko za urpiner, papka chutila dobre, a žena fajne kuri	rather no	3	probably yes	probably yes	probably yes		rather yes
Základná škola	boy		I don't know povedať	2	8	4	Sme partia	9	Skoro nič	rather yes	I don't know	yes	rather yes	yes	rather yes	yes	yes	rather yes	yes	3	yes	rather yes	4	4	had a little fun	had a little fun	had a little fun				probably yes	probably yes	probably yes	probably yes			Skvelá práca.	probably yes	4	probably yes	probably yes	probably yes		yes
Základná škola	boy		Veľmi plyesvacia stránka dobrá YODA chváliť.	1	1	4	ľudo-opov trebalo zvýšiť.	8	ja YODA hrať s autobotom a s mečom sveteľným.	yes	Snažil som ja YODA robiť hru ale to YODA nešlo tak on povedať jebať radšej zobral micro.bita a robo-auta a bola sranda mohutná než app.inventorovi.	len v inom no byť.	no len v inom byť.	YODA za pravdu vám dať.	YODA nesúhlprobablyť s výrokom vašim.	yes	rather yes	rather no	yes	4	rather yes	no	1	2	not amused at all	very much enjoyed	very much enjoyed				no	no	probably yes	yes			Peťko R2D2 musieť misiu splniť. Pomenovaný strach musieť byť tvoj, než zapudiť môžeš ho. Jedi moc získavať skrz porozumeno, Sith získávať silu moc skrz.	probably yes	2	yes	no	no		rather yes
Gymnázium Ľ. Štúra	boy		forma výučby	4	8	5	kamarátstvo	9	programoval	rather yes	aplikácie	rather yes	rather yes	rather yes	rather yes	yes					rather yes	rather yes	3	3							probably yes	probably yes
Gymnázium M. Rúfusa	boy		forma výučby	4	8	4	náhoda, losovano,	8	plyesval úlohy, testoval	yes	programoval aplikacie	yes	yes	rather yes	rather yes	yes	yes	yes	yes	5	yes	yes	5	4	very much enjoyed	not amused at all	very much enjoyed				probably yes	yes	no	yes			n	yes	5	probably yes	yes	probably yes		yes
Gymnázium M. Rúfusa	boy		výučba	5	10	4	losovano	10	testoval, programoval	rather no	programoval	yes	yes	yes	yes	yes	yes	yes	rather yes	0	rather yes	rather yes	5	5	very much enjoyed	not amused at all	very much enjoyed				yes	probably yes	no	probably yes			super	no	5	probably yes	probably yes	yes		rather yes
Stredná odborná škola technická	boy		samoštúdium	3	5	4	priateľstva	6	testoval	rather yes	programoval	rather yes	rather yes	rather yes	rather yes	yes	yes	rather yes	rather yes	0	rather no	rather no	4	4	very much enjoyed	not amused at all	very much enjoyed				yes	yes	no	probably yes			nič	no	4	probably yes	yes	yes		rather no
Stredná odborná škola technická	boy		forma výučby	4	7	5	kamarátstvo	8	programoval	rather yes	vytváral som hry	yes	yes	yes	yes	yes	yes	yes	yes	1	rather yes	rather yes	4	3	very much enjoyed	not amused at all	very much enjoyed				yes	yes	no	yes			len tak Ďalej	no	3	yes	yes	yes		rather yes
Gymnázium Andreja Sládkoviča	boy		typ výučby	5	10	3	podľa toho koho som poznal	10	programoval	yes	hry, aplikácie	yes	yes	yes	yes	yes	yes	yes	yes	0	rather yes	yes	5	5	very much enjoyed	had a little fun	very much enjoyed				yes	yes	yes	yes			len tak Ďalej	yes	5	yes	yes	yes		rather yes
Gymnázium Andreja Sládkoviča	boy		výučba	5	10	3	známosť	9	programoval, testoval	rather yes	programy	rather yes	rather yes	rather yes	rather yes	yes	rather yes	rather yes	rather no	0	rather yes	rather yes	5	4	very much enjoyed	had a little fun	very much enjoyed				yes	yes	yes	yes			pokračovať vo výučbe	yes	4	yes	yes	yes		rather yes
Gymnázium Andreja Sládkoviča	boy		samoštúdium	4	8	3	známosť	8	testoval, vypracovával otázky	rather yes	testoval, vypracovával otázky	rather yes	rather yes	rather yes	rather yes	yes	rather yes	rather yes	rather yes	4	rather yes	rather yes	4	4	had a little fun	not amused at all	had a little fun				yes	probably yes	probably yes	yes			:)	probably yes	4	yes	probably yes	yes		rather yes
Gymnázium Andreja Sládkoviča	boy		forma výučby	3	5	2	kamarátstvo	6	programoval	rather yes	hry	rather yes	rather yes	rather yes	rather yes	yes	rather yes	rather yes	yes	0	rather yes	rather yes	4	3	had a little fun	not amused at all	had a little fun				yes	probably yes	probably yes	yes			nič	probably yes	3	yes	probably yes	yes		rather yes
Gymnázium Andreja Sládkoviča	boy		výučba	4	7	2	kamarátstvo	3	nič	rather no	nič	rather yes	rather yes	rather yes	rather yes	rather yes	rather no	rather no	rather no	0	no	no	5	4	had a little fun	not amused at all	had a little fun				rather no	rather no	rather no	rather no			a	rather no	4	rather no	rather no	rather no		no
Stredná odborná škola technická	boy		Forma	5	7	3.4	Výber	9	Možné aj nemožné	yes	Prezentácie	rather yes	yes	yes	no	yes	rather yes	rather yes	rather no	3	rather yes	yes	2	3	had a little fun	not amused at all	very much enjoyed				probably yes	yes	yes	yes			Bolo mi cťou	probably yes	3	yes	yes	no		rather yes
Stredná odborná škola technická	boy		Nikdy som o tom nepočul	4	5	2	Nevytvorili	8	Nič	yes	Nič	rather yes	rather yes	yes	rather no	rather yes	rather yes	rather yes	rather no	3	rather no	yes	2	2	not amused at all	had a little fun	had a little fun				probably yes	no	probably yes	probably yes			Chcem skúsiť eduScrum	probably yes	2	probably yes	no	probably yes		rather no
Stredná odborná škola technická	boy		Nový spôsob učenia	5	8	4	Na základe výberu vlastností jednotlivých členou.	8	organyzoval	yes	aplikácie	rather yes	yes	yes	rather yes	yes	yes	yes	yes	0	rather yes	yes	4	5	had a little fun	had a little fun	very much enjoyed				probably yes	yes	yes	yes			Je to výborná spôsob vyučovania :)	yes	5	yes	yes	yes		rather yes
Stredná odborná škola technická	boy		eduScrum	2	3	4	rozkazu	2	programoval	rather yes	programovano	rather no	rather no	rather no	rather no	rather no	rather no	rather no	rather no	1	rather no	rather no	2	2	not amused at all	not amused at all	not amused at all				rather no	rather no	rather no	rather no			táto otázka je povinná	rather no	2	rather no	rather no	rather no		rather no
Stredná odborná škola technická	boy		I don't know čo to je	4	5	3	zivotopisu	6	programoval	rather yes	určite ano napriklad mikrobitom	rather yes	rather yes	rather yes	rather no	no	no	no	no	2	rather no	no	4	5	had a little fun	very much enjoyed	had a little fun				rather no	yes	no	yes			dakujem	no	5	yes	yes	no		rather no
Stredná odborná škola technická	boy		I don't know	1	1	252	podla ničoho	5	prišiel som do školy	yes	hral som hacknute hry	ako kedy podla toho kolko spím	ku-pussy yami ngokuphelele	čo ja viem podla toho kde ale na technickej určite no	それは完全に私の猫の中にあります	rather no	rather yes				rather yes	rather yes	3	3							probably yes	probably yes
Stredná odborná škola technická	boy		Vzájomná práca v tímoch, a samovýučba	3	6	4	Náhodne si nás volili lídri tímov.	7	Programoval a pracoval na prezentácii	yes	Programoval som aplikácie a kompletizoval prezentáciu	rather no	rather no	yes	Je to iné, ale hore nohami no. no je to až také zlé, je to nočo nové.	rather yes	rather yes	yes	yes	2	rather no	yes	5	5	very much enjoyed	had a little fun	very much enjoyed				probably yes	yes	rather no	probably yes			Boli ste ochotný nám vždy pomôcť, ďakujeme..	rather no	5	probably yes	yes	probably yes		rather no
Stredná odborná škola technická	boy		na zá	4	9	4	na základe vlastností ludí	8	aplikácie a microbit	rather yes	robil som aplikácie	rather yes	yes	rather yes	rather no	yes	rather yes	yes	rather yes	3	rather yes	yes	5	4	very much enjoyed	had a little fun	very much enjoyed				probably yes	probably yes
Stredná odborná škola technická	boy		učil je to super vec a odporučam učit touto formou	5	10	3	Na zaklade schopnistí	10	robil som prace	yes	ano	yes	yes	yes	no	yes	yes	yes	yes	4	rather yes	yes	5	5	very much enjoyed	had a little fun	very much enjoyed				rather no	yes	rather no	yes			bolo to super	probably yes	5	yes	yes	probably yes		rather no
Stredná odborná škola technická	boy		naučiť sa základy programovania	1	5	4	tímy boli tvorené výberom jednotlivcov ktorý boli leadermi tímu a oni si vyberali členov svojho tímu	7	vytváral aplikácie a pracoval s microbitmi ako aj programovano lego mindstorming	rather yes	tvoril som aplikácie teda programoval a zároveň tvoril robota z lega ktorého sme neskôr programovali	rather no	yes	yes	rather yes	rather yes	rather yes	rather no	rather yes	1	rather no	rather yes	1	3	not amused at all	not amused at all	had a little fun				rather no	no	no	no			no	no	3	no	no	rather no		rather no
Stredná odborná škola technická	boy		Cyklus	4	9	3	Na základe princípov morálky a slušnosti som si nemohol dovoliť nechať mojich menej intelektuálne vyspelých spolužiakov pracovať samých.	10	Programovano	yes	Všetko čo som považoval za prínosné pre fungovano tímu.	yes	yes	yes	rather no	rather yes	yes	rather yes	yes	3	no	yes	5	5	very much enjoyed	very much enjoyed	very much enjoyed				yes	yes	yes	yes			good job	yes	5	yes	yes	yes		no
Stredná odborná škola technická	boy		forma výučby	5	9	3.4	výberu pomocou vlastností, ktoré zadal vyučujúci	10	aplikácie, programovano	yes	aplikácie	yes	yes	yes	yes	yes	yes	yes	yes	4	rather no	yes	5	4	very much enjoyed	very much enjoyed	very much enjoyed				yes	yes	rather no	yes			super	rather no	4	yes	yes	yes		rather no
Stredná odborná škola technická	boy		vyucba v time	5	10	3.4	vlastnosti	10	programoval	yes	hry	yes	yes	yes	yes	yes	yes	yes	yes	5	rather no	yes	5	5	very much enjoyed	very much enjoyed	very much enjoyed				yes	yes	probably yes	yes			super	probably yes	5	yes	yes	yes		rather no
Gymnázium M. Rúfusa	boy		Forma vyucby	5	10	4	Podla nahody	7	Scrummaster	rather yes	Programovano	yes	rather yes	rather yes	yes	yes	yes	yes	rather yes	3	rather no	yes	4	5	very much enjoyed	very much enjoyed	had a little fun				yes	yes	yes	rather no			Super hodiny	yes	5	rather no	yes	yes		rather no
Gymnázium M. Rúfusa	boy		moderne techniky	3	4	2	kamaratstva	8	programoval v aplikacii	rather yes	nerobil	rather yes	rather yes	rather no	rather no	rather yes	rather yes	rather no	rather yes	2	rather yes	rather no	3	3	had a little fun	had a little fun	very much enjoyed				rather no	probably yes	rather no	probably yes			dakujem vam za spolupracu :P	rather no	3	probably yes	probably yes	rather no		rather yes
Gymnázium M. Rúfusa	boy		forma výučby pomocou modernej techniky	4	9	boli sme štyria	na základe toho ,že sa bavime aj mimo informatiky	7	pomáhal som kódovať ,hladal som tutorialy na nete.	rather no	pracoval som	yes	rather yes	rather yes	rather no	yes	rather yes	yes	yes	3	rather yes	yes	4	3	very much enjoyed	had a little fun	very much enjoyed				yes	yes	probably yes	probably yes			ďakujeme za váš čas a úsilie ,taktiež za vašu schopnosť pomáhať nám ,aj keď nás to občas nebavilo	probably yes	3	probably yes	yes	yes		rather yes
Gymnázium M. Rúfusa	boy		forma výučby	4	9	4	Náhodne	8	programoval	yes	yes. Vymýšľal som čo ideme robiť	rather yes	rather yes	rather yes	rather yes	rather yes	yes	yes	yes	2	rather no	rather yes	4	4	very much enjoyed	had a little fun	very much enjoyed				yes	probably yes	rather no	yes			no	rather no	4	yes	probably yes	yes		rather no
ZŠ Ďumbierska - IX.A	boy		yes, pracovano v teame	3	6	3	na základe losovania	5	programoval	rather yes	programy	záleží podľa obsahu	yes	yes	rather no	rather no	rather yes	rather no	yes	0	rather no	rather yes	1	3	not amused at all	not amused at all	had a little fun	not amused at all	had a little fun	had a little fun	no	no	no	probably yes	no	probably yes	no
ZŠ Ďumbierska - IX.A	boy		spôsob výučby	4	7	boli sme traja	Náhodne, na základe dotazníkov	10	Programnoval som	rather yes	robil som iba podľa zadaní	rather yes	yes	yes	rather yes	rather yes	rather yes	rather no	rather yes	3	rather yes	rather yes	3	2	had a little fun	not amused at all	very much enjoyed	had a little fun	not amused at all	had a little fun	probably yes	rather no	rather no	rather no	rather no	rather no	.
ZŠ Ďumbierska - IX.A	boy		Spôsob výučby v tímoch. (Ako vo firmách kde sa programuje)	4	7	Traja	Náhodne	7	Zisťoval tvoreno kódu, následné tvoreno toho kódu	rather yes	Väčšinou som robil podľa tutoriálov, takže probably ani no.	rather yes	yes	yes	Príde mi že je toto vyučovano oveľa komplikovanejšie ako "bežné" hodiny. Preto si myslím že na to aby takéto vyučovano mohlo poriadne fungovať, museli by žiaci mať viacej hodín informatiky. To by sa mohlo pobiť s ostatnými "dôležitejšími" predmetmi.	rather no	rather yes	rather no	rather yes	2	rather no	yes	3	3	not amused at all	had a little fun	very much enjoyed	had a little fun	very much enjoyed	had a little fun	rather no	no	probably yes	probably yes	yes	probably yes	Ďakujem za vašu trpezlivosť s nami.
ZŠ Ďumbierska - IX.A	boy		metóda na výučbu programovania	3	6	3	na príkaz nadriadeného	9	programoval	rather no	občas. výroba stránky	na oboch vieš byť kreatívny	rather yes	yes	rather no	rather yes	yes	rather no	yes	3	rather no	rather yes	3	4	had a little fun	not amused at all	very much enjoyed	had a little fun	very much enjoyed	had a little fun	probably yes	rather no	no	probably yes	probably yes	rather no	probably nič takého. Som celkom spokojný s tými hodinami.
ZŠ Ďumbierska - IX.A	boy		Nepamätám sa, čim som sa touto formou učil	3	5	3	boli sme rozdelený náhodne	8	čo som mohol	rather no	hlavne práca s micro bitom	rather no	yes	rather yes	rather no	rather no	rather yes	no	yes	3	rather yes	yes	3	2	had a little fun	had a little fun	very much enjoyed	had a little fun	had a little fun	not amused at all	rather no	probably yes	rather no	yes	rather no	probably yes	probably nič
ZŠ Ďumbierska - IX.A	boy		kreatívna/originálna vyučovacia metóda	4	8	3, ale pracovali sme individualne	spolusediaci	3	robil som vlastné projekty	rather yes	snažil som sa vymyslieť originálne programy/originálne spracovať zadano	yes	je potrebné mať nejakú predstavu, ale plyesm by som to nenazval	rather no	ak sa bude ďalej rozvíjať, tak yes.	rather yes	yes	rather no	no	0	rather yes	rather yes	2	2	not amused at all	not amused at all	had a little fun	not amused at all	had a little fun	very much enjoyed	yes	probably yes	probably yes	rather no	no	probably yes	tento rok mi rozhodne dal toho viacej ako som očakával a väčšinou sa mi vyučovano vyučovano páčilo.
ZŠ Ďumbierska - IX.A	boy		I don't know	2	6	3	rng, náhoda	9	to čo každý	yes	creativitu mám rád ale nepamätám si	rather yes	yes	yes	yes	rather no	rather no	no	yes	1	rather yes	rather yes	2	3	not amused at all	had a little fun	very much enjoyed	had a little fun	had a little fun	not amused at all	no	no	no	rather no	rather no	rather no	To no je vaša chyba, ale mňa tak trochu toto nebavilo
ZŠ Ďumbierska - IX.B	boy		Vyučovano na Pc	3	5	yes 4	I don't know	10	všetko	yes	yes Skoro všetko	yes	yes	no	yes	yes	yes	yes	yes	2	rather no	yes	2	4	had a little fun	had a little fun	very much enjoyed	had a little fun	had a little fun	very much enjoyed	yes	rather no	no	yes	probably yes	rather no	ste super
ZŠ Ďumbierska - IX.B	boy		pohode	4	8	yes bol som v time bolo nas 4	losovano	10	robil som to co mi povedali	yes	ani no	yes	rather yes	rather yes	yes	yes	rather yes	yes	yes	3	rather no	rather yes	4	4	had a little fun	had a little fun	had a little fun	had a little fun	had a little fun	not amused at all	probably yes	probably yes	probably yes	probably yes	probably yes	probably yes	no
ZŠ Ďumbierska - IX.B	boy		vyučovano na ikt technológiách	1	3	yes 4ks ľudí	na základe vyberania osobností bez toho aby sme o tom predtým vedeli o koho ide	10	napamätám	yes	ja som kreatívny sám o sebe	probably yes	yes	yes	rather no	rather no	rather yes	rather no	yes	3	rather yes	yes	4	3	very much enjoyed	not amused at all	had a little fun	very much enjoyed	had a little fun	not amused at all	rather no	yes	no	rather no	probably yes	probably yes	Že bol veľmi príjemný, komunikatívny a pomohol keď bolo treba
ZŠ Ďumbierska - IX.B	boy		forma, ktorú sme sa učili nasledujúce mesiace cez počítač	5	10	boli sme 4	na základe empatie a túžbe spraviť najlepšiu aplikáciu	10	Motivoval som náš tím aby pracoval :)	yes	Robil som design aplikácie.	yes	rather yes	yes	no	rather yes	yes	rather yes	yes	5	no	yes	5	4	very much enjoyed	very much enjoyed	had a little fun	had a little fun	very much enjoyed	very much enjoyed	yes	yes	no	yes	yes	yes	Ďakujeme, bolo to super a boli ste skvelý učiteľ
ZŠ Ďumbierska - IX.B	boy		yes, je to veľmi dobré, bavilo ma to	5	10	4	vybrali sme si náhodne spolužiakov	10	zapisoval som kroky práce	rather yes	vytváral som pokyny v appinventor	yes	yes	yes	rather yes	yes	yes	yes	yes	5	rather no	yes	5	5	very much enjoyed	not amused at all	very much enjoyed	very much enjoyed	very much enjoyed	very much enjoyed	yes	yes	yes	yes	yes	yes	Vaša práca je veľmi užitočná pre súčasnú generáciu, máte super prístup k Vašim žiakom, taktiež by som s Vami rád spolupracoval v budúcnosti ak by to bolo možné. :)
ZŠ Ďumbierska - IX.B	boy		ano tine hry stranky čo sme robili	1	5	ano 4	na zaklade dotazníka	8	pomahal som ale skôr nič	rather yes	no	no	rather yes	yes	ako sa to vezme nokomu to vyhovovalo mne no mam radčej vyučovano na bežnej hodine	rather yes	yes	rather no	rather yes	0	yes	yes	2	2	not amused at all	not amused at all	very much enjoyed	had a little fun	not amused at all	not amused at all	no	rather no	rather no	probably yes	rather no	rather no	Vaša práca bola zaujímava mali ste k nám super prístup.
Gymnázium Ľ. Štúra	boy	eight-year grammar school kvarta	system vyucovania, praca v skupinach	3	6	3	najskor losovano a ptm tak jak prišlo proste	10	to co ostatny	yes	no	rather yes	rather yes	rather no	rather no	rather yes	rather yes	no	yes	0	no	rather yes	1	4	not amused at all	not amused at all	had a little fun	very much enjoyed	very much enjoyed	had a little fun	probably yes	no	no	probably yes	probably yes	yes	no
Gymnázium Ľ. Štúra	boy	eight-year grammar school kvarta	forma učenia	3	5	2	random	8	50%	rather yes	programovano	rather yes	rather no	rather yes	rather no	rather no	rather yes	rather no	rather yes	2	rather no	rather yes	2	2	had a little fun	had a little fun	had a little fun	had a little fun	had a little fun	had a little fun	probably yes	rather no	probably yes	probably yes	probably yes	probably yes	no
Gymnázium Ľ. Štúra	boy	eight-year grammar school kvarta	Ano, je to nejake zadano prace a odprezentovano	5	9	Boli sme dvaja a potok traja	Na základe toho s kým sa mi najlepšie robí	8													rather yes	rather yes	3	3							probably yes	probably yes
Gymnázium Ľ. Štúra	boy	eight-year grammar school kvarta	systém vyučovano, pri ktorom robíme v skupine	4	8	boli sme dvaja	1. krát podľa papierov so schopnosťami, 2. krát podľa toho ako sme chceli	10	časť prezentácie, pomáhal som s programovaním	yes	vymýšľal som nové hry	yes	yes	rather yes	rather yes	yes	rather yes	rather no	yes	3	rather no	rather yes	4	4	very much enjoyed	not amused at all	not amused at all	very much enjoyed	not amused at all	not amused at all	probably yes	yes	no	no	yes	no	Že hodiny ma bavili viac ako normálne.
Gymnázium M. Rúfusa	boy		Systém výučby	4	9	4	Rozne- anonymne, losovanim	10	Programovano,aplikacie	yes	Stale noco	yes	yes	yes	yes	yes	yes	rather yes	yes	4	rather no	yes	5	4	very much enjoyed	we didn't do it with him	very much enjoyed	very much enjoyed	we didn't do it with him	very much enjoyed	yes	probably yes	I don't know, nerobil som	probably yes	probably yes	I don't know, nerobil som	Nic
Gymnázium M. Rúfusa	boy		Sposob vyucby	4	9	4	Anonymne	9	Prezentacie, programovano, vymyslano napadov	yes		rather yes	yes	yes	yes	rather yes	rather yes	rather yes	yes	4	rather no	yes	5	4	very much enjoyed	we didn't do it with him	very much enjoyed	very much enjoyed	we didn't do it with him	had a little fun	yes	yes	I don't know, nerobil som	probably yes	yes	I don't know, nerobil som
Gymnázium M. Rúfusa	boy		Pvyucovano v timoch	4	9	4	Na zaklade vyplnenych vlastnosti	10	Kod	yes		yes	yes	yes	rather yes	yes	rather yes	rather yes	yes	3	rather no	yes	5	3	very much enjoyed	we didn't do it with him	very much enjoyed	very much enjoyed	we didn't do it with him	very much enjoyed	probably yes	probably yes	I don't know, nerobil som	yes	yes	I don't know, nerobil som
Gymnázium M. Rúfusa	boy		Vyucba v timoch	5	10	4	Anonymne	10	Zo vsetkeho trosku	rather yes	Vlastne ulohy	rather yes	yes	yes	yes	rather yes	yes	yes	yes	3	rather no	yes	4	4	very much enjoyed	we didn't do it with him	had a little fun	very much enjoyed	we didn't do it with him	had a little fun	probably yes	yes	I don't know, nerobil som	probably yes	probably yes	I don't know, nerobil som
Gymnázium M. Rúfusa	boy		Sposob ako prebieha vyucovano inak	5	10	4	Na zaklade kvalit a vlastnosti- papiera	8	Vsetko	yes	Stále nočo	yes	yes	yes	yes	rather yes	rather yes	yes	yes	5	rather yes	yes	5	5	had a little fun	we didn't do it with him	very much enjoyed	very much enjoyed	we didn't do it with him	had a little fun	probably yes	probably yes	I don't know, nerobil som	probably yes	probably yes	I don't know, nerobil som
Gymnázium M. Rúfusa	boy		Iná výučba ako na predchádzajúcich hodinách informatiky	4	9	4	Na základe papiera od učiteľa	7	Prezentácie na demo hodinu, otázky, hľadano riešení	rather yes		rather yes	rather yes	rather yes	rather yes	yes	rather yes	rather yes	yes	3	rather no	yes	5	3	very much enjoyed	we didn't do it with him	had a little fun	very much enjoyed	we didn't do it with him	had a little fun	yes	yes	I don't know, nerobil som	yes	yes	I don't know, nerobil som
Gymnázium M. Rúfusa	boy		samovýučba pomocou tutoriálov v skupinách	5	8	3.4	Kvality - papier	9	robil som iba podľa zadaní	rather yes	nápady na vytvoreno aplikácie	yes	yes	yes	yes	yes	rather yes	yes	yes	4	rather yes	yes	5	4	very much enjoyed	we didn't do it with him	very much enjoyed	very much enjoyed	we didn't do it with him	had a little fun	probably yes	yes	I don't know, nerobil som	probably yes	yes	I don't know, nerobil som
Gymnázium M. Rúfusa	boy		spôsob výučby	5	9	3 a 4	papierov od učiteľa - probably schopnosti to boli	9	programoval, robil úlohy	rather yes	vymýšľal obsah úloh	rather yes	yes	yes	yes	yes	yes	yes	yes	4	rather yes	yes	5	5	very much enjoyed	we didn't do it with him	very much enjoyed	very much enjoyed	we didn't do it with him	very much enjoyed	yes	yes	I don't know, nerobil som	yes	yes	I don't know, nerobil som
Gymnázium M. Rúfusa	boy		forma výučby	5	10	3.4	najprv podľa kvalít a potom si ma vybrali do tímu	9	programovano	yes		yes	yes	yes	yes	yes	yes	yes	yes	4	yes	yes	5	5	very much enjoyed	we didn't do it with him	had a little fun	very much enjoyed	we didn't do it with him	had a little fun	probably yes	yes	I don't know, nerobil som	yes	yes	I don't know, nerobil som
Gymnázium M. Rúfusa	boy		výučba v skupinách, kde je učiteľ iba kouč	5	9	4	kvalít a schopností a potom losovano neskôr	9	scrum master, logiku, programovano, otázky	yes	vymýšľal logiku aplikácií	yes	yes	yes	yes	rather yes	rather yes	rather yes	rather yes	4	rather yes	yes	5	5	very much enjoyed	we didn't do it with him	had a little fun	had a little fun	we didn't do it with him	had a little fun	yes	yes	I don't know, nerobil som	yes	yes	I don't know, nerobil som
Gymnázium M. Rúfusa	boy		spôsob ako sme sa učili	5	10	4	losovano, podľa papierov od učiteľa	10	logiku, aplikácie, scrum master	rather yes	všetko bolo kreatívne	yes	yes	yes	yes	yes	yes	rather yes	yes	3	yes	yes	5	4	very much enjoyed	we didn't do it with him	very much enjoyed	very much enjoyed	we didn't do it with him	very much enjoyed	probably yes	probably yes	I don't know, nerobil som	probably yes	probably yes	I don't know, nerobil som
Gymnázium M. Rúfusa	boy		spôsob ako sme sa učili	5	9	štyria	na základe takého papiera, čo sme vypĺňali	9	logiku a programovano aplikácií	yes	celý čas to bolo kreatívne	yes	yes	yes	yes	yes	yes	yes	yes	5	rather yes	yes	5	5	very much enjoyed	we didn't do it with him	very much enjoyed	very much enjoyed	we didn't do it with him	very much enjoyed	probably yes	probably yes	I don't know, nerobil som	probably yes	probably yes	I don't know, nerobil som
Gymnázium M. Rúfusa	boy		systém výučby	5	10	4	kamarátstvo, papiere od učiteľa, čo sme vypĺňali	10	v každom šprinte nočo - programovano, logiku, otázky...	yes	logiku hier	yes	yes	yes	yes	yes	yes	rather yes	rather yes	3	rather yes	yes	5	5	very much enjoyed	we didn't do it with him	had a little fun	had a little fun	we didn't do it with him	had a little fun	probably yes	probably yes	I don't know, nerobil som	probably yes	probably yes	I don't know, nerobil som
Gymnázium M. Rúfusa	boy		spôsob výučby v tímoch	4	9	4	kamarátstvo	9	programovano	yes		yes	yes	yes	yes	rather yes	rather yes	rather yes	rather yes	3	rather yes	yes	4	3	very much enjoyed	we didn't do it with him	very much enjoyed	very much enjoyed	we didn't do it with him	had a little fun	probably yes	probably yes	I don't know, nerobil som	probably yes	probably yes	I don't know, nerobil som
Gymnázium Ľ. Štúra	boy	eight-year grammar school kvarta	metóda vyučovania	5	10	4	na základe papierov, čo sme vypĺňali od učiteľa	9	všetko	yes	programovano	yes	yes	yes	yes	yes	yes	yes	yes	4	rather yes	yes	5	4	very much enjoyed	we didn't do it with him	we didn't do it with him	very much enjoyed	we didn't do it with him	we didn't do it with him	yes	yes	I don't know, nerobil som	I don't know, nerobil som	yes	I don't know, nerobil som
Gymnázium Ľ. Štúra	boy	eight-year grammar school kvarta	vyučovano v skupinách, samoštúdium	5	9	4	také papiere, ktoré nám rozdal učiteľ, vypĺňali sme naše schopnosti	9	programovano, vymýšľano nápadu	yes	vymýšľano logiky hry, programovano	yes	yes	yes	rather yes	yes	yes	yes	yes	3	rather yes	yes	5	5	very much enjoyed	we didn't do it with him	we didn't do it with him	very much enjoyed	we didn't do it with him	we didn't do it with him	yes	yes	I don't know, nerobil som	I don't know, nerobil som	yes	I don't know, nerobil som
Gymnázium Ľ. Štúra	boy	eight-year grammar school kvarta	forma výučby	5	8	4	papiere od učiteľa	8	všetko sme robili všetci	rather yes		yes	yes	yes	yes	yes	yes	yes	yes	3	yes	yes	5	4	very much enjoyed	very much enjoyed	we didn't do it with him	very much enjoyed	we didn't do it with him	we didn't do it with him	yes	yes	I don't know, nerobil som	I don't know, nerobil som	yes	I don't know, nerobil som
Gymnázium Ľ. Štúra	boy	eight-year grammar school kvarta	vyučovano v tímoch, samoštúdium	5	10	4	anonymne na základe vyplnených papierov	9	programovano	yes	všetko	yes	yes	yes	yes	yes	rather yes	yes	yes	3	rather yes	yes	5	4	very much enjoyed	we didn't do it with him	we didn't do it with him	very much enjoyed	we didn't do it with him	we didn't do it with him	yes	yes	I don't know, nerobil som	I don't know, nerobil som	yes	I don't know, nerobil som
																								3.61321

## Sheet: primary schools
School	Gender	School year	You learned through eduScrum. What do you think eduScrum is?	Compare conventional teaching and eduScrum - which do you lean more towards?	How much did you like eduScrum?	You've been working in a team. How many of you were there?	On what bprobablys did you form the team?	How would you rate your team and cooperation?	What did you do in the team?	Do you think you're good to work with? Are you a team player?	Did you get creative in class last night? If yes, what was it?	Do you think you can be more creative in an eduScrum class than in a regular class?	Is plyesvano important in eduScrum?	Is task planning important? (We don't just mean eduScrum, but in general)	"eduScrum turns teaching upside down." Do you agree with this statement?	What did these lessons give you? [entertainment]	What did these lessons give you? [personal growth (I learned a lot)]	What did these lessons give you? [motivation for computer science]	What did these lessons give you? [collaboration]	How much did the flipboard help you?	Have you often needed help from a teacher?	The essence of eduScrum is that you can solve a big problem if you break it down into smaller problems and solve problems one at a time. Do you agree with that?	How did you like App Inventor?	How did you get better at programming?	How much did you enjoy the following: [App Inventor]	How much did you enjoy the following: [Android Studio]	How much did you enjoy the following: [micro:bit]	How much did you enjoy the following: [MakeCode Arcade (programmed 2D games)]	How much did you enjoy the following: [Minecraft: Educational Edition]	How much did you enjoy the following: [Site Programming (HTML, CSS)]	Would you like to continue learning [through eduScrum?]	Would you like to continue learning [in App Inventor?]	Would you like to continue learning [in App Inventor?]	Would you like to continue learning [with micro:bit?]	Would you like to continue learning [MakeCode Arcade (games)]	Would you like to continue learning [Minecraft]	Would you like to say good night to Mr. Lecturer?	Column1	_1	_2	_3	_4	_5	_6
Základná škola	girl		I don't know	1	1	89	Podľa 30tich rovnobežiek	10	Jozefa	yes	Hral hry	no	no	no	yes	no	no	no	no	0	no	no	1	1	not amused at all	not amused at all	not amused at all				no	no	no	no			NIČ, pozdravte ho	no	1	no	no	no		no
Základná škola	boy		ale cau	3	9	5	kupujte ale cau merch	1	vsetko oni sa len pozeerali	yes	urobil som hru	rather yes	I don't know	yes	rather no	yes	rather yes	yes	yes	3	rather no	yes	5	4	very much enjoyed	had a little fun	very much enjoyed				no	yes	no	yes			use code ADAMKOSS10	no	4	yes	yes	no		rather no
Základná škola	girl		I don't know	3	5	98	vyučujúci nás rozdelil	10	vyhladavala potrebne veci	rather yes	nepamatam si	yes	I don't know	rather yes	rather yes	yes	rather yes	rather yes	yes	1	rather yes	rather yes	4	2	had a little fun	not amused at all	very much enjoyed				rather no	rather no	rather no	rather no			no	rather no	2	rather no	rather no	rather no		rather yes
Základná škola	boy		I don't know ale cau	3	5	jop boli sme cca 5.5	random	8		rather yes		rather yes									rather yes	rather yes	3	3							probably yes	probably yes
Základná škola	boy		I don't know	3	8	yes. 5	kamaráti	10	hru	rather yes	Psychickú podporu	yes	rather yes	yes	I don't know	yes	yes	yes	yes	3	rather yes	yes	5	3	very much enjoyed	very much enjoyed	very much enjoyed				yes	yes	yes	yes			Pokračujte v tom čo robíte	yes	3	yes	yes	yes		rather yes
Základná škola	girl		I don't know	1	2	4	vyberali sme si	9	skoro nič	rather yes	no	rather no	rather yes	rather yes	rather no	yes	rather no	rather no	rather yes	2	rather no	yes	3	2	had a little fun	had a little fun	had a little fun				rather no	rather no	rather no	probably yes			no	rather no	2	probably yes	rather no	rather no		rather no
Základná škola	girl		I don't know	3	8	4	sme rodina	9	to co ostatni	no	no	rather yes	rather yes	rather yes	yes	rather yes	rather yes	rather no	rather yes	1	rather yes	yes	1	2	not amused at all	not amused at all	not amused at all				rather no	rather no	rather no	probably yes			no
Základná škola	boy		forma výučby	4	7	5	girltá si vyberali členov	4	všetko	yes	Programoval som	yes	rather yes	yes	rather no	rather yes	yes	yes	rather yes	1	rather yes	rather yes	5	5	very much enjoyed	not amused at all	had a little fun				probably yes	yes	rather no	probably yes			Bolo to celkom zaujímavé , hlavne ten appinventor PS: Sub2Pewdiepie	rather no	5	probably yes	yes	probably yes		rather yes
Základná škola	girl		forma vyučby si samy vytvoriť aplikacie	2	8	3	na základe dobrovolnej voľby	5	nič	rather no	no	rather yes	rather no	yes	rather yes	rather no	no	no	rather no	0	yes	yes	1	1	not amused at all	not amused at all	very much enjoyed				no	no	no	yes			nič	no	1	yes	no	no		yes
Základná škola	girl		forma vyučby si samy vytvorit aplikacie	4	8	3	dobrovolna vola	8		rather yes		rather yes									rather yes	rather yes	3	3							probably yes	probably yes
Základná škola	boy		Forma výučby , mozme si samy vytvarat aplikacie	3	8	3	Na základe dobrovoľnej voľby	4	Skoro všetko	yes	Robil vlastnú hru	yes	yes	rather no	rather no	yes	yes	rather yes	yes	1	yes	yes	3	5	had a little fun	not amused at all	very much enjoyed				yes	yes	no	yes			Bavia ma vaše hodiny	no	5	yes	yes	yes		yes
Základná škola	boy		Forma výučby	4	9	5	Spolužiačky vyberali členov	8	Pracoval som so svojím spolužiakom	yes	Programovano	rather yes	yes	yes	rather yes	yes	rather yes	yes	yes	2	rather yes	yes	5	3	very much enjoyed	had a little fun	very much enjoyed				probably yes	probably yes	rather no	probably yes			Bolo to super lebo som si mohol vyskúšať nočo iné len ako písať vo Worde.	rather no	3	probably yes	probably yes	probably yes		rather yes
Základná škola	boy		Pestrejšie vyučovano informatiky	4	7	4	random	10	hlavnú pozíciu	rather yes	Skúšal som vztvoriť nejaku game ale stále sa učím	rather yes	yes	yes	rather yes	rather yes	rather yes	yes			rather yes	rather yes	3	3							probably yes	probably yes
Základná škola	boy		Ci vitrtkam mamu ci boa	3	9	4	Partia	10	Väčšinou veľa vecí	rather yes	už si nepamätám	yes	rather yes	rather yes	rather yes	yes	rather yes	rather yes	rather yes	1	rather yes	yes	4	3	very much enjoyed	had a little fun	had a little fun				probably yes	probably yes	rather no	probably yes			diki jožko za urpiner, papka chutila dobre, a žena fajne kuri	rather no	3	probably yes	probably yes	probably yes		rather yes
Základná škola	boy		I don't know povedať	2	8	4	Sme partia	9	Skoro nič	rather yes	I don't know	yes	rather yes	yes	rather yes	yes	yes	rather yes	yes	3	yes	rather yes	4	4	had a little fun	had a little fun	had a little fun				probably yes	probably yes	probably yes	probably yes			Skvelá práca.	probably yes	4	probably yes	probably yes	probably yes		yes
Základná škola	boy		Veľmi plyesvacia stránka dobrá YODA chváliť.	1	1	4	ľudo-opov trebalo zvýšiť.	8	ja YODA hrať s autobotom a s mečom sveteľným.	yes	Snažil som ja YODA robiť hru ale to YODA nešlo tak on povedať jebať radšej zobral micro.bita a robo-auta a bola sranda mohutná než app.inventorovi.	rather yes	no len v inom byť.	YODA za pravdu vám dať.	YODA nesúhlprobablyť s výrokom vašim.	yes	rather yes	rather no	yes	4	rather yes	no	1	2	not amused at all	very much enjoyed	very much enjoyed				no	no	probably yes	yes			Peťko R2D2 musieť misiu splniť. Pomenovaný strach musieť byť tvoj, než zapudiť môžeš ho. Jedi moc získavať skrz porozumeno, Sith získávať silu moc skrz.	probably yes	2	yes	no	no		rather yes
ZŠ Ďumbierska - IX.A	boy		yes, pracovano v teame	3	6	3	na základe losovania	5	programoval	rather yes	programy	rather yes	yes	yes	rather no	rather no	rather yes	rather no	yes	0	rather no	rather yes	1	3	not amused at all	not amused at all	had a little fun	not amused at all	had a little fun	had a little fun	no	no	no	probably yes	no	probably yes	no
ZŠ Ďumbierska - IX.A	girl		nemám ani poňatia /metóda práce	1	1	3	náhodného výberu	10	apliácie,hry,rôzne internetové stránky atď...	yes	rôzne hry?	rather yes	rather yes	yes	rather no	no	rather yes	no	yes	0	rather no	rather yes	1	2	not amused at all	not amused at all	had a little fun	not amused at all	not amused at all	had a little fun	no	no	no	rather no	no	yes	XD
ZŠ Ďumbierska - IX.A	girl		probably yes. I don't know čo to je	2	2	yes, traja.	Tak ako sme sedeli	10	Nič, hľadala som obrázky na internete. Snažia som sa zapájať	yes	nič	rather yes	no	rather yes	yes	yes	rather no	no	rather yes	0	rather no	rather yes	1	2	not amused at all	not amused at all	not amused at all	not amused at all	had a little fun	not amused at all	no	no	no	no	no	rather no	:))
ZŠ Ďumbierska - IX.A	boy		spôsob výučby	4	7	boli sme traja	Náhodne, na základe dotazníkov	10	Programnoval som	rather yes	robil som iba podľa zadaní	rather yes	yes	yes	rather yes	rather yes	rather yes	rather no	rather yes	3	rather yes	rather yes	3	2	had a little fun	not amused at all	very much enjoyed	had a little fun	not amused at all	had a little fun	probably yes	rather no	rather no	rather no	rather no	rather no	.
ZŠ Ďumbierska - IX.A	boy		Spôsob výučby v tímoch. (Ako vo firmách kde sa programuje)	4	7	Traja	Náhodne	7	Zisťoval tvoreno kódu, následné tvoreno toho kódu	rather yes	Väčšinou som robil podľa tutoriálov, takže probably ani no.	rather yes	yes	yes	Príde mi že je toto vyučovano oveľa komplikovanejšie ako "bežné" hodiny. Preto si myslím že na to aby takéto vyučovano mohlo poriadne fungovať, museli by žiaci mať viacej hodín informatiky. To by sa mohlo pobiť s ostatnými "dôležitejšími" predmetmi.	rather no	rather yes	rather no	rather yes	2	rather no	yes	3	3	not amused at all	had a little fun	very much enjoyed	had a little fun	very much enjoyed	had a little fun	rather no	no	probably yes	probably yes	yes	probably yes	Ďakujem za vašu trpezlivosť s nami.
ZŠ Ďumbierska - IX.A	boy		metóda na výučbu programovania	3	6	3	na príkaz nadriadeného	9	programoval	rather no	občas. výroba stránky	rather yes	rather yes	yes	rather no	rather yes	yes	rather no	yes	3	rather no	rather yes	3	4	had a little fun	not amused at all	very much enjoyed	had a little fun	very much enjoyed	had a little fun	probably yes	rather no	no	probably yes	probably yes	rather no	probably nič takého. Som celkom spokojný s tými hodinami.
ZŠ Ďumbierska - IX.A	boy		Nepamätám sa, čim som sa touto formou učil	3	5	3	boli sme rozdelený náhodne	8	čo som mohol	rather no	hlavne práca s micro bitom	rather no	yes	rather yes	rather no	rather no	rather yes	no	yes	3	rather yes	yes	3	2	had a little fun	had a little fun	very much enjoyed	had a little fun	had a little fun	not amused at all	rather no	probably yes	rather no	yes	rather no	probably yes	probably nič
ZŠ Ďumbierska - IX.A	girl		Pracovano v tíme	1	1	Boli sme traja	vylosovali sme si mená	10	snažila som sa spolupracovať a otravovala som prívržníkov	yes	Vymýšľala rôzne veci inak	rather yes	no	určite yes ale not for me	no	yes	rather yes	no	yes	0	yes	yes	1	2	not amused at all	not amused at all	had a little fun	had a little fun	very much enjoyed	not amused at all	rather no	no	no	no	no	yes	všetko dobre
ZŠ Ďumbierska - IX.A	girl		pracovano v tíme	3	7	3	Losovali sme si papiere	10	Každý mal nejakú úlohu	yes	yes, napr. Microbit alebo Minecraft	rather yes	no	yes	bežné vyučovano yes, lebo je to nočo iné a nové, na čo nemáme pripravené prostriedky	rather yes					rather yes	rather yes	3	3							probably yes	probably yes
ZŠ Ďumbierska - IX.A	boy		kreatívna/originálna vyučovacia metóda	4	8	3, ale pracovali sme individualne	spolusediaci	3	robil som vlastné projekty	rather yes	snažil som sa vymyslieť originálne programy/originálne spracovať zadano	yes	je potrebné mať nejakú predstavu, ale plyesm by som to nenazval	rather no	ak sa bude ďalej rozvíjať, tak yes.	rather yes	yes	rather no	no	0	rather yes	rather yes	2	2	not amused at all	not amused at all	had a little fun	not amused at all	had a little fun	very much enjoyed	yes	probably yes	probably yes	rather no	no	probably yes	tento rok mi rozhodne dal toho viacej ako som očakával a väčšinou sa mi vyučovano vyučovano páčilo.
ZŠ Ďumbierska - IX.A	boy		I don't know	2	6	3	rng, náhoda	9	to čo každý	yes	creativitu mám rád ale nepamätám si	rather yes	yes	yes	yes	rather no	rather no	no	yes	1	rather yes	rather yes	2	3	not amused at all	had a little fun	very much enjoyed	had a little fun	had a little fun	not amused at all	no	no	no	rather no	rather no	rather no	To no je vaša chyba, ale mňa tak trochu toto nebavilo
ZŠ Ďumbierska - IX.B	boy		Vyučovano na Pc	3	5	yes 4	I don't know	10	všetko	yes	yes Skoro všetko	yes	yes	no	yes	yes	yes	yes	yes	2	rather no	yes	2	4	had a little fun	had a little fun	very much enjoyed	had a little fun	had a little fun	very much enjoyed	yes	rather no	no	yes	probably yes	rather no	ste super
ZŠ Ďumbierska - IX.B	girl		I don't know	3	3	3	nepamätám si	5	I don't know	yes	ano	rather yes	rather yes	rather yes	rather yes	rather yes	no	no	rather yes	1	rather yes	rather yes	2	2	not amused at all	not amused at all	had a little fun	had a little fun	not amused at all	not amused at all	rather no	rather no	rather no	rather no	rather no	rather no	no
ZŠ Ďumbierska - IX.B	girl		ano	2	2	3	Schopností	9	Všeličo	yes	ano vytvarala hry	rather yes	rather yes	rather yes	rather no	rather no	rather yes	no	yes	2	rather yes	rather yes	2	4	not amused at all	not amused at all	had a little fun	had a little fun	not amused at all	not amused at all	probably yes	probably yes
ZŠ Ďumbierska - IX.B	girl		iná forma učeniaNE	2	3	3	boli sme pri sebe	5	to čo som vedela	rather yes	nič kreatívne	rather yes	rather no	rather no	rather yes	rather no	rather yes	rather no	rather yes	2	yes	rather no	2	1	not amused at all	not amused at all	had a little fun	not amused at all	had a little fun	very much enjoyed	rather no	rather no	rather no	probably yes	rather no	rather no	no
ZŠ Ďumbierska - IX.B	boy		pohode	4	8	yes bol som v time bolo nas 4	losovano	10	robil som to co mi povedali	yes	ani no	yes	rather yes	rather yes	yes	yes	rather yes	yes	yes	3	rather no	rather yes	4	4	had a little fun	had a little fun	had a little fun	had a little fun	had a little fun	not amused at all	probably yes	probably yes	probably yes	probably yes	probably yes	probably yes	no
ZŠ Ďumbierska - IX.B	boy		vyučovano na ikt technológiách	1	3	yes 4ks ľudí	na základe vyberania osobností bez toho aby sme o tom predtým vedeli o koho ide	10	napamätám	yes	ja som kreatívny sám o sebe	probably yes	yes	yes	rather no	rather no	rather yes	rather no	yes	3	rather yes	yes	4	3	very much enjoyed	not amused at all	had a little fun	very much enjoyed	had a little fun	not amused at all	rather no	yes	no	rather no	probably yes	probably yes	Že bol veľmi príjemný, komunikatívny a pomohol keď bolo treba
ZŠ Ďumbierska - IX.B	boy		forma, ktorú sme sa učili nasledujúce mesiace cez počítač	5	10	boli sme 4	na základe empatie a túžbe spraviť najlepšiu aplikáciu	10	Motivoval som náš tím aby pracoval :)	yes	Robil som design aplikácie.	yes	rather yes	yes	no	rather yes	yes	rather yes	yes	5	no	yes	5	4	very much enjoyed	very much enjoyed	had a little fun	had a little fun	very much enjoyed	very much enjoyed	yes	yes	no	yes	yes	yes	Ďakujeme, bolo to super a boli ste skvelý učiteľ
ZŠ Ďumbierska - IX.B	girl		metóda učenia	2	3	4	na základe dotazníkov	5	vytvárala aplikáciu	rather no	vytvárali sme aplikácie a stránky	rather yes	rather yes	rather yes	rather no	rather no	rather yes	rather no	rather no	0	rather yes	rather no	2	2	not amused at all	not amused at all	not amused at all	not amused at all	not amused at all	had a little fun	rather no	no	no	no	no	probably yes	ani no
ZŠ Ďumbierska - IX.B	girl		metóda učenia	3	5	5	vlastností	5	všetko	yes	vymýšľali sme aplikáciu	rather yes	rather yes	rather yes	no	rather no	rather yes	no	rather yes	0	rather yes	rather yes	2	3	had a little fun	not amused at all	had a little fun	not amused at all	had a little fun	had a little fun	probably yes	rather no	no	rather no	rather no	probably yes	ani no
ZŠ Ďumbierska - IX.B	girl		uhuhuhuhuhuhuhuhuhuhuhuhuhuhuhuhuhuhuhuhuhuhuhuhuhuhuhuhuhuhuh	2	2	yes pracovala nás 4	Podľa Voštiho papierov :)	8	tvárila sa že nočo robím	rather yes	vytvárala stránky cez HTML	yes	rather no	yes	rather no	yes	yes	rather no	yes	2	yes	yes	4	3	had a little fun	had a little fun	very much enjoyed	had a little fun	very much enjoyed	not amused at all	rather no	rather no	rather no	probably yes	rather no	yes	have a nice dayyyyyyyyyyyyyyy :)
ZŠ Ďumbierska - IX.B	girl		Celkom fajn výučba	4	6	yes, boli 4	podľa dotazníka	4	Spolupracovala a pomáhala	rather yes	Robili sme aplikácie - kalkulačka a hra	yes	rather yes	rather yes	rather no	rather yes	yes	rather yes	rather yes	2	rather yes	rather no	3	2	had a little fun	not amused at all	had a little fun	had a little fun	very much enjoyed	not amused at all	probably yes	probably yes	rather no	probably yes	yes	yes	Dobre vyučoval
ZŠ Ďumbierska - IX.B	girl		metóda vyučovania	4	10	4	na základe vyplnených dotazníkov o našich vlastnostiach	9	vždy nočo iné.	rather yes	prezentácie	yes	rather yes	rather no	yes, ale v dobrom slova zmysle	rather no	yes	no	yes	3	yes	yes	5	2	very much enjoyed	had a little fun	very much enjoyed	not amused at all	very much enjoyed	not amused at all	yes	yes	probably yes	yes	rather no	yes	probably no.
ZŠ Ďumbierska - IX.B	girl		Forma učenia pomocou ktorej sme sa učili	3	7	4	Podľa papierov na zemi	8	pomáhal som	yes	Robili sme rôzne aplikácie	rather yes	yes	yes	rather yes	rather yes	yes	rather yes	yes	0	rather yes	rather yes	3	4	had a little fun	not amused at all	had a little fun	not amused at all	not amused at all	very much enjoyed	probably yes	rather no	no	rather no	rather no	rather no	Ďakujeme za super hodiny
ZŠ Ďumbierska - IX.B	girl		I don't know , pracovano na počítači	2	3	fuh probably 3-4 sme boli	podľa osobnosti človeka	6	kedže I don't know tieto veci a ani ma to nejako nebaví , no som v tom vôbec zručná snažila som sa aspoň trochu pomáhať	rather yes	vytvorila som si vlastnú stránku	rather yes	rather no	rather yes	no	rather no	rather yes	no	rather yes	0	yes	rather yes	2	2	not amused at all	not amused at all	not amused at all	not amused at all	not amused at all	had a little fun	rather no	rather no	no	no	no	no	prepáčte , mojimi odpovedami som Vás nechcela nijako uraziť ani nič , ale mňa osobne informatika nebaví. Nikdy som k tomu nemala vzťah a pochybujem že nokedy aj mať budem. Učili ste ale fajn , len mňa to nezaujalo.
ZŠ Ďumbierska - IX.B	boy		yes, je to veľmi dobré, bavilo ma to	5	10	4	vybrali sme si náhodne spolužiakov	10	zapisoval som kroky práce	rather yes	vytváral som pokyny v appinventor	yes	yes	yes	rather yes	yes	yes	yes	yes	5	rather no	yes	5	5	very much enjoyed	not amused at all	very much enjoyed	very much enjoyed	very much enjoyed	very much enjoyed	yes	yes	yes	yes	yes	yes	Vaša práca je veľmi užitočná pre súčasnú generáciu, máte super prístup k Vašim žiakom, taktiež by som s Vami rád spolupracoval v budúcnosti ak by to bolo možné. :)
ZŠ Ďumbierska - IX.B	boy		ano tine hry stranky čo sme robili	1	5	ano 4	na zaklade dotazníka	8	pomahal som ale skôr nič	rather yes	no	no	rather yes	yes	ako sa to vezme nokomu to vyhovovalo mne no mam radčej vyučovano na bežnej hodine	rather yes	yes	rather no	rather yes	0	yes	yes	2	2	not amused at all	not amused at all	very much enjoyed	had a little fun	not amused at all	not amused at all	no	rather no	rather no	probably yes	rather no	rather no	Vaša práca bola zaujímava mali ste k nám super prístup.
Gymnázium Ľ. Štúra	girl	eight-year grammar school kvarta	systém vyučovania, práca v skupinách	3	5	3	na základe kamarátskych vzťahov	8	projekt, prezentácia	rather yes	vytvárali sme nový kód samostatne	rather yes	rather yes	rather yes	rather yes	no	rather no	no	rather no	2	no	rather no	1	2	not amused at all	not amused at all	not amused at all	not amused at all	very much enjoyed	not amused at all	probably yes	no	no	no	rather no	yes	bolo by super, ak by nám pán lektor vedel viac pomôcť:)
Gymnázium Ľ. Štúra	girl	eight-year grammar school kvarta	systém vyučovania	2	2	3	ako prišlo	7	kód aj prezentáciu	yes	yes vymýšľala som nápad na hru	rather yes	no	yes	rather yes	yes					rather yes	rather yes	3	3							probably yes	probably yes
Gymnázium Ľ. Štúra	girl	eight-year grammar school kvarta	systém vyučovania	4	5	3	podľa náhodného výberu, podľa sympatií	8	skoro všetko	yes	nahrávali sme zvuky zvierat	rather yes	rather yes	yes	rather no	rather yes	rather no	rather no			rather yes	rather yes	3	3							probably yes	probably yes
Gymnázium Ľ. Štúra	boy	eight-year grammar school kvarta	system vyucovania, praca v skupinach	3	6	3	najskor losovano a ptm tak jak prišlo proste	10	to co ostatny	yes	no	rather yes	rather yes	rather no	rather no	rather yes	rather yes	no	yes	0	no	rather yes	1	4	not amused at all	not amused at all	had a little fun	very much enjoyed	very much enjoyed	had a little fun	probably yes	no	no	probably yes	probably yes	yes	no
Gymnázium Ľ. Štúra	boy	eight-year grammar school kvarta	forma učenia	3	5	2	random	8	50%	rather yes	programovano	rather yes	rather no	rather yes	rather no	rather no	rather yes	rather no	rather yes	2	rather no	rather yes	2	2	had a little fun	had a little fun	had a little fun	had a little fun	had a little fun	had a little fun	probably yes	rather no	probably yes	probably yes	probably yes	probably yes	no
Gymnázium Ľ. Štúra	boy	eight-year grammar school kvarta	Ano, je to nejake zadano prace a odprezentovano	5	9	Boli sme dvaja a potok traja	Na základe toho s kým sa mi najlepšie robí	8		rather yes		rather yes									rather yes	rather yes	3	3							probably yes	probably yes
Gymnázium Ľ. Štúra	girl	eight-year grammar school kvarta	Systém vyučovania	3	7	1	Bola by som príliš veľká pomoc proti ostatným	10	Kodovano, prezentaciu	yes	Hry, ich rozne verzie a vylepšenia k nim	rather yes	rather yes	yes	Neutrálne	rather yes	yes				rather yes	rather yes	3	3							probably yes	probably yes
Gymnázium Ľ. Štúra	girl	eight-year grammar school kvarta	je to tímová práca na programovaní, štýl učenia	3	7	traja	náhoda	9	kód, prezentáciu	rather yes	vymýšľali sme hru a aplikáciu	rather yes	rather yes	rather yes	rather no	rather yes	rather yes	rather yes	rather yes		rather no	rather yes	2	3	had a little fun		had a little fun	had a little fun			probably yes	rather no					no
Gymnázium Ľ. Štúra	boy	eight-year grammar school kvarta	systém vyučovano, pri ktorom robíme v skupine	4	8	boli sme dvaja	1. krát podľa papierov so schopnosťami, 2. krát podľa toho ako sme chceli	10	časť prezentácie, pomáhal som s programovaním	yes	vymýšľal som nové hry	yes	yes	rather yes	rather yes	yes	rather yes	rather no	yes	3	rather no	rather yes	4	4	very much enjoyed	not amused at all	not amused at all	very much enjoyed	not amused at all	not amused at all	probably yes	yes	no	no	yes	no	Že hodiny ma bavili viac ako normálne.
Gymnázium Ľ. Štúra	girl	eight-year grammar school kvarta	systém vyučovania v skupinách bez nejakého veľkého vysvetlenia učiteľom	3	5	4	na základe pocitu	9	z každého (kód, prezentácia) trochu	rather yes	vymýšľala aplikáciu	rather no	rather yes	rather yes	rather no	rather no	rather yes	rather no	yes	3	rather no	rather yes	2	3	not amused at all	had a little fun	very much enjoyed	had a little fun	had a little fun	had a little fun	probably yes	rather no	no	probably yes	rather no	no	probably no
Gymnázium Ľ. Štúra	girl	eight-year grammar school kvarta	systém vyučovania	3	5	3	podla kamaratov	10	kódy	rather yes	ano	rather yes	I don't know	rather yes	I don't know sa vyjadriť	yes	rather yes	no	rather yes		rather yes	rather yes	3	2	very much enjoyed			had a little fun			probably yes	probably yes					no
Gymnázium Ľ. Štúra	girl	eight-year grammar school kvarta	yes, je to forma výučby v skupinách.	3	6	yes, boli sme 4.	Na základe náhody.	9	Z každej časti nočo.	rather yes	yes, vytvárala vlastnú aplikáciu a hru.	rather no	rather yes	yes	rather no	rather no	rather yes	rather no	yes	3	rather yes	rather no	2	3	not amused at all	had a little fun	very much enjoyed	very much enjoyed	had a little fun	had a little fun	probably yes	rather no	no	no	yes	no	Do skorého videnia!
Gymnázium Ľ. Štúra	girl	eight-year grammar school kvarta	systém vyučovania	3	4	v prvom 2 v druhom 3	najskôr nás rozdelil učiteľ potom sme sa rozhodli sami	10	všetko sme robili spolu	rather yes	vymýšľala som odpovede na otázky alebo akú hru ideme vytvoriť	rather yes	I don't know	rather yes	I don't know sa vyjadriť	yes	rather yes	no	yes	0	rather yes	rather yes	3	2	very much enjoyed	not amused at all	not amused at all	had a little fun	not amused at all	not amused at all	probably yes	probably yes	no	no	rather no	no	no
Gymnázium Ľ. Štúra	girl	eight-year grammar school kvarta	forma výučby	5	9	4	dokument od učiteľa	9	čo bolo treba	yes	stále nočo	yes	yes	rather yes	yes	yes	yes	yes	yes	4	yes	yes	5	5	very much enjoyed	we didn't do it with him	very much enjoyed	very much enjoyed	we didn't do it with him	very much enjoyed	yes	yes	I don't know, nerobil som	probably yes	yes	I don't know, nerobil som
Gymnázium Ľ. Štúra	boy	eight-year grammar school kvarta	metóda vyučovania	5	10	4	na základe papierov, čo sme vypĺňali od učiteľa	9	všetko	yes	programovano	yes	yes	yes	yes	yes	yes	yes	yes	4	rather yes	yes	5	4	very much enjoyed	we didn't do it with him	we didn't do it with him	very much enjoyed	we didn't do it with him	we didn't do it with him	yes	yes	I don't know, nerobil som	I don't know, nerobil som	yes	I don't know, nerobil som
Gymnázium Ľ. Štúra	boy	eight-year grammar school kvarta	vyučovano v skupinách, samoštúdium	5	9	4	také papiere, ktoré nám rozdal učiteľ, vypĺňali sme naše schopnosti	9	programovano, vymýšľano nápadu	yes	vymýšľano logiky hry, programovano	yes	yes	yes	rather yes	yes	yes	yes	yes	3	rather yes	yes	5	5	very much enjoyed	we didn't do it with him	we didn't do it with him	very much enjoyed	we didn't do it with him	we didn't do it with him	yes	yes	I don't know, nerobil som	I don't know, nerobil som	yes	I don't know, nerobil som
Gymnázium Ľ. Štúra	girl	eight-year grammar school kvarta	metóda výučby	4	9	4	kvality a schopnosti - papier	9	aplikácie	yes	všetko bolo kreatívne	yes	yes	yes	yes	yes	yes	yes	yes	3	yes	rather yes	4	4	very much enjoyed	we didn't do it with him	we didn't do it with him	very much enjoyed	we didn't do it with him	we didn't do it with him	yes	yes	I don't know, nerobil som	I don't know, nerobil som	yes	I don't know, nerobil som
Gymnázium Ľ. Štúra	girl	eight-year grammar school kvarta	forma výučby	3	7	4	papier od učiteľa, ktorý sme vypĺňali	8	prezentácia, prečo otázky, morálna podpora	rather yes	vymýšľala som nápady	rather yes	rather yes	rather yes	rather yes	rather yes	rather yes	rather no	rather yes	2	yes	rather yes	3	3	had a little fun	we didn't do it with him	we didn't do it with him	had a little fun	we didn't do it with him	we didn't do it with him	probably yes	probably yes	I don't know, nerobil som	I don't know, nerobil som	probably yes	I don't know, nerobil som
Gymnázium Ľ. Štúra	girl	eight-year grammar school kvarta	samoštúdium podľa seba	3	6	4	papier od učiteľa	9	čo bolo treba	yes		rather yes	rather yes	rather yes	rather yes	rather yes	rather yes	rather yes	rather yes	2	rather yes	rather yes	3	3	had a little fun	we didn't do it with him	we didn't do it with him	had a little fun	we didn't do it with him	we didn't do it with him	probably yes	probably yes	I don't know, nerobil som	I don't know, nerobil som	probably yes	I don't know, nerobil som
Gymnázium Ľ. Štúra	boy	eight-year grammar school kvarta	forma výučby	5	8	4	papiere od učiteľa	8	všetko sme robili všetci	rather yes		yes	yes	yes	yes	yes	yes	yes	yes	3	yes	yes	5	4	very much enjoyed	very much enjoyed	we didn't do it with him	very much enjoyed	we didn't do it with him	we didn't do it with him	yes	yes	I don't know, nerobil som	I don't know, nerobil som	yes	I don't know, nerobil som
Gymnázium Ľ. Štúra	girl	eight-year grammar school kvarta	výučba v tímoch	3	6	4	papier od učiteľa	8	prečo otázky, prezentácie	rather yes		rather yes	rather yes	rather yes	yes	yes	rather yes	rather yes	yes	2	yes	rather yes	3	3	had a little fun	had a little fun	we didn't do it with him	very much enjoyed	we didn't do it with him	we didn't do it with him	probably yes	probably yes	I don't know, nerobil som	I don't know, nerobil som	yes	I don't know, nerobil som
Gymnázium Ľ. Štúra	boy	eight-year grammar school kvarta	vyučovano v tímoch, samoštúdium	5	10	4	anonymne na základe vyplnených papierov	9	programovano	yes	všetko	yes	yes	yes	yes	yes	rather yes	yes	yes	3	rather yes	yes	5	4	very much enjoyed	we didn't do it with him	we didn't do it with him	very much enjoyed	we didn't do it with him	we didn't do it with him	yes	yes	I don't know, nerobil som	I don't know, nerobil som	yes	I don't know, nerobil som
Gymnázium Ľ. Štúra	girl	eight-year grammar school kvarta	iná forma vyučovania	3	7	4	učiteľ nás rozdelil na základe vyplnených papierov	9	prezentáciu a prečo otázky	rather yes		yes	yes	yes	yes	yes	rather yes	rather yes	yes	2	yes	yes	3	4	very much enjoyed	we didn't do it with him	we didn't do it with him	very much enjoyed	we didn't do it with him	we didn't do it with him	probably yes	probably yes	I don't know, nerobil som	I don't know, nerobil som	probably yes	I don't know, nerobil som
Gymnázium Ľ. Štúra	girl	eight-year grammar school kvarta	forma výučby	3	6	4	papiere od učiteľa	9	aplikácie	yes		yes	yes	yes	yes	rather yes	rather yes	rather yes	rather yes	2	rather yes	rather yes	3	3	had a little fun	we didn't do it with him	we didn't do it with him	very much enjoyed	we didn't do it with him	we didn't do it with him	probably yes	probably yes	I don't know, nerobil som	I don't know, nerobil som	probably yes	I don't know, nerobil som
Gymnázium Ľ. Štúra	girl	eight-year grammar school kvarta	forma výučby	3	8	4	papiere od učiteľa	8	prezentáciu, prečo otázky, programovano	rather yes		rather yes	rather yes	rather yes	rather yes	yes	rather yes	rather yes	yes	2	rather yes	yes+X50X4X2:X69	3	3	very much enjoyed	we didn't do it with him	we didn't do it with him	had a little fun	we didn't do it with him	we didn't do it with him	probably yes	probably yes	I don't know, nerobil som	I don't know, nerobil som	probably yes	I don't know, nerobil som
				3.07353																			2.97059	2.98529

## Sheet: secondary schools
School	Gender	School year	You learned through eduScrum. What do you think eduScrum is?	Compare conventional teaching and eduScrum - which do you lean more towards?	How much did you like eduScrum?	You've been working in a team. How many of you were there?	On what basis did you form the team?	How would you rate your team and cooperation?	What did you do in the team?	Do you think you're good to work with? Are you a team player?	Did you get creative in class last night? If yes, what was it?	Do you think you can be more creative in an eduScrum class than in a regular class?	Is plyesvano important in eduScrum?	Is task planning important? (We don't just mean eduScrum, but in general)	"eduScrum turns teaching upside down." Do you agree with this statement?	What did these lessons give you? [entertainment]	What did these lessons give you? [personal growth (I learned a lot)]	What did these lessons give you? [motivation for computer science]	What did these lessons give you? [collaboration]	How much did the flipboard help you?	Have you often needed help from a teacher?	The essence of eduScrum is that you can solve a big problem if you break it down into smaller problems and solve problems one at a time. Do you agree with that?	How did you like App Inventor?	How did you get better at programming?	How much did you enjoy the following: [App Inventor]	How much did you enjoy the following: [Android Studio]	How much did you enjoy the following: [micro:bit]	How much did you enjoy the following: [MakeCode Arcade (programmed 2D games)]	How much did you enjoy the following: [Minecraft: Educational Edition]	How much did you enjoy the following: [Site Programming (HTML, CSS)]	Would you like to continue learning [through eduScrum?]	Would you like to continue learning [in App Inventor?]	Would you like to continue learning [in App Inventor?]	Would you like to continue learning [with micro:bit?]	Would you like to continue learning [MakeCode Arcade (games)]	Would you like to continue learning [Minecraft]	Would you like to say good night to Mr. Lecturer?	Column1	_1	_2	_3	_4	_5	_6
Gymnázium M. Rúfusa	boy		eduScrum je forma učenia v skupinách, ktorá nám prinosla nové zážitky a skúsenosti z oblasti IT. Pracovali sme v teamoch.	3	8	Záležalo na výbere tímu. Ale buď 3 alebo 4	Vyberali sme si postupne ľudí do tímu	8	V každom jednom šprinte som urobil to, na čom sme sa dohodli. Väčšinou to bola hra	rather yes	Väčšinou som robil to, čo už dávno je. Učil som sa	rather yes	yes	yes	rather yes	yes	yes	yes	rather yes	2	rather no	yes	4	3	very much enjoyed	not amused at all	very much enjoyed				probably yes	yes	rather no	yes			Dobrá práca :)	rather no	3	yes	yes	probably yes	8	rather no
Gymnázium M. Rúfusa	boy		Je to forma vyučovania, pri ktorej každý pracuje na vlastnom projekte, a pri tom si rozdelí úlohy tak, aby dokázal vyriešiť určitý problém	4	7	3 až 4	Na začiatku vyberal kapitán, neskôr náhodne	3	snažil som sa najviac zapojiť do vymýšľania aplikácie, neskôr urobiť svoj podiel na práci	rather yes	no	rather yes	yes	yes	rather no	rather yes	yes	rather yes	rather no	0	rather no	rather yes	4	5	very much enjoyed	had a little fun	not amused at all				probably yes	probably yes	probably yes	rather no			V tom Inkognite si bol celkom frajer	yes	5	no	probably yes	probably yes	7	rather no
Gymnázium M. Rúfusa	boy		Práca v skupinách pod vedením scrum mastra	4	8	3.4	Vlastný výber/losovaním	7	Aj scrum mastra, väčšinou som pracoval na logike aplikácii	rather yes	Aplikácie :)	yes	yes	yes	rather no	rather yes	yes	yes	rather yes	3	rather no	rather yes	4	4	very much enjoyed	very much enjoyed	had a little fun				probably yes	probably yes	yes	probably yes			Dobrá práca :D	yes	4	probably yes	probably yes	probably yes	7	no
Gymnázium M. Rúfusa	boy		Ano, eduScrum je forma ucenia v ktorej pracujeme ako jeden tym a pomahame si navzajom ked noco nevieme	5	10	Ano pracoval. Boli sme 4	Na zaklade vyberu nokoho kto si ptm vyberal ostatnych	10	Vzdy noco ine	yes	Aj hej aj no	yes	yes	rather yes	rather yes	yes	yes	yes	yes	3	rather yes	rather yes	1	4	had a little fun	very much enjoyed	very much enjoyed				probably yes	rather no	probably yes	probably yes			Bolo to urcite ine ako normalne hodiny a vies hlavne pomoct ked mame niaky problem alebo nam noco nejde	probably yes	4	probably yes	rather no	probably yes	10	rather yes
Gymnázium M. Rúfusa	boy		Forma učenia kde sa žiaci prerozdelila do tímov a snažia sa pracovať ako v korporátnych firmách na úlohe ktorá im je zadaná	3	8	3.4	Určil sa vždy scrum master pre skupinu a ten si vyberal spomedzi ostatných koho chce	8	Záleží na tom aku úlohu som dostal robil som aj grafické rozhrano aj softvér aplikácie	rather yes	Vymýšľal sme nové aplikácie alebo sa snažili zdokonaliť už existujúce.	rather yes	yes	yes	rather yes	rather yes	yes	yes	yes	2	rather no	yes	4	4	very much enjoyed	very much enjoyed	very much enjoyed				probably yes	probably yes	yes	yes			Je to frajer	yes	4	yes	probably yes	probably yes	8	rather no
Gymnázium M. Rúfusa	girl		práca v tíme	3	8	3.4	výber, losovano	9	snažila som sa spolupracovať s tímom a pomáhať najviac ako sa dalo	yes	aplikácie	rather yes	rather yes	yes	rather yes	rather yes	yes	yes	yes	4	rather no	yes	5	4	very much enjoyed	very much enjoyed	had a little fun				probably yes	yes	probably yes	rather no			Ďakujeme	probably yes	4	rather no	yes	probably yes	8	rather no
Gymnázium M. Rúfusa	boy		Forma učenia pri ktorej daná osoba vedie hodinu podľa určitých plyesv	3	8	Boli sme štyria	Na základe výberu scrum mastera	8	Odpoveď na otázky a vytvoreno svojej aplikácie alebo časti spoločnej	rather yes	Skôr som pracoval doma, na hodinách som sa venoval vzdelávaniu v nových prostrediach	rather yes	yes	yes	rather no	yes	yes	yes	yes	3	rather yes	yes	4	3	had a little fun	had a little fun	had a little fun				probably yes	probably yes	rather no	probably yes			no
Gymnázium M. Rúfusa	boy		Je to vzdelávano na ktorom sa pracuje spolu v skupinách. Je vybraný líder skupiny, ktorý rozdeľuje úlohy.	3	9	V jednom tíme sme boli 4 členovia	Zo začiatku sme si zvolili lídra a ten si ďalej volil svojich členov	9	Snazil som sa splniť vsetky ulohy	yes	Na hodinách som sa prevažne snažil len nájsť inšpiráciu a porozumieť problematike ale na projekte som robil ďalej doma	rather yes	yes	yes	rather yes	rather yes	rather yes	rather yes	yes	2	no	rather yes	4	4	very much enjoyed	not amused at all	very much enjoyed				probably yes	yes	rather no	yes			Super	rather no	4	yes	yes	probably yes	9	no
Gymnázium M. Rúfusa	boy		Je to forma výučby zameraná na prácu v tíme. Študenti sa učia prostredníctvom vlastných chýb a projektov.	2	4	4,3,3,2	Na základe náhodnosti.	8	Zakaždým nočo inšio. Rozdelili sme si úlohy, ktoré sa menili.	rather no	Moja práca na hodinách bolo z väčšej časti kreatívna a to rôznymi spôsobmi.	yes	yes	yes	rather yes	yes	rather yes	rather no	yes	3	rather no	no	3	4	had a little fun	very much enjoyed	not amused at all				rather no	no	yes	no			10 001 000 110 111 100 000 000 000 000 000 000 000 000 000 000 000 000 000 000 000 000 000 000 000 000 000 000 000 000 000 000 000 000 000 000 000 000 000 000 000 000 000 000 000 000 000 000 000 000 000 000 000 000 000 000 000 000 000 000 000 000 000 000	yes	4	no	no	rather no	4	rather no
Gymnázium M. Rúfusa	girl		Program na školách, ktorý dáva študentom možnosť nazrieť do nočoho, čo by na škole pravdepodobne normálne nevyskúšali.	4	8	3.4	Spočiatku si každý Scrum master volil ľudí do tímu, no raz si náhodne ťahali papieriky s menami ľudí.	10	Všetko, na čom sme sa dohodli.	rather yes	Vymýšľala vlastné aplikácie.	yes	rather yes	rather yes	rather yes	yes	yes	yes	yes	1	rather no	yes	5	3	very much enjoyed	not amused at all	very much enjoyed				probably yes	yes	rather no	probably yes			Myslím si, že práca v Android Studiu bola oveľa ťažšia ako v App Inventore, preto by bolo do budúcna probably lepšie, keby sa ľudia pred tým, ako doň prejdú, pripravili aspoň teoreticky (keby sa im vysvetlili základné príkazy, no len prostredníctvom samoštúdia na internete).	rather no	3	yes	yes	probably yes	8	rather no
Gymnázium M. Rúfusa	boy		Jedinečná príležitosť zažiť skúsenosť skupinovej práce a vlastného riadenia štúdia.	4	7	4	Ako kedy. Väčšinou demokraticky. Raz no.	7	programovano/dizajn/otázky podľa pridelených úloh v tíme	yes	yes. Vymýšľano aplikácii a zaujímavých nápadov.	rather yes	yes	yes	rather yes	rather yes	yes	rather yes	rather yes	0	no	rather yes	4	3	very much enjoyed	had a little fun	had a little fun				yes	rather no	probably yes	no			I. fáza (microbit + appinventor) bola super. Prechod do druhej je však dosť veľký skok, pre tých z nás, ktorí neprogramovali v Jave.	probably yes	3	no	rather no	yes	7	rather no
Gymnázium M. Rúfusa	girl		Vyučba v tíme cez vlastne projekty, pricom sa pri tvorbe ucime pracovat s novou vecou	5	9	3,4,4,2	Vzdy si styria ludia vyberali tím, nahodne cez papieriky	5	Zvycajne jednu celu aplikaciu	rather yes	Vymyslala aplikaciu o com bude a jej vyzor	yes	yes	yes	rather no	yes	yes	yes	rather no	0	no	rather yes	2	3	not amused at all	very much enjoyed	not amused at all				yes	rather no	yes	probably yes			Vdaka za sprijemneno vyucovania :)	yes	3	probably yes	rather no	yes	9	no
Gymnázium Ľ. Štúra	boy		Skvelý spôsob štúdia	4	7	6	Na základe dobrej komunikácii a dlhoročnej spolupráce členov tímu.	8	Prácu sme mali spravodlivo rozdelenú	yes	no	yes	yes	yes	no	yes	rather yes	rather yes	yes	3	rather no	yes	4	4	very much enjoyed	not amused at all	very much enjoyed				yes	probably yes	rather no	yes			no	rather no	4	yes	probably yes	yes	7	rather no
Gymnázium Ľ. Štúra	boy		učeno sa formou programovania aby sme mali skúsenosti ak by sme s tým chceli pokračovať	2	6	6	priateľstva	3	nič také konkrétne probably všetko	yes	grafiku a design na appku	rather yes	yes	yes	rather yes	yes	rather no	rather no	rather yes	0	yes	rather yes	4	1	very much enjoyed	not amused at all	very much enjoyed				rather no	probably yes	no	probably yes			si král	no	1	probably yes	probably yes	rather no	6	yes
Gymnázium Ľ. Štúra	girl		ina forma ucenia zalozena na spoluprace a samoeceni	3	7	5	na zaklade sympatii	10	tak rozne	yes	vymyslano napadov o com aplikacie budu a tvoreno aplikacie	yes	yes	yes	rather yes	yes	rather yes	rather no	yes	1	rather no	rather yes	4	4	had a little fun	not amused at all	very much enjoyed				probably yes	probably yes	no	yes			no	no	4	yes	probably yes	probably yes	7	rather no
Gymnázium Ľ. Štúra	boy		Forma učenia samostatne a rozvíjano kreativity a spolupráce	2	3	5	Viac menej náhodne	6	programovano	rather yes	vytváral nové aplikácie z hlavy	yes	rather yes	yes	yes	rather yes	yes	rather no	rather yes	1	rather no	rather yes	5	4	very much enjoyed	not amused at all	very much enjoyed				probably yes	yes	probably yes	yes			V AppInventor-e a MicroBit-e sa jednoducho tvoria aplikácie a človek tvorbu v nich dokážu pochopiť aj sami. Bohužiaľ Android Studio je veľmi zložité na pochopeno a učitelia od nás očakávali nočo nad naše sily. Problém aj bol že nedostatočné (v podstate žiadne) vysvetleno Android Studia budilo v nás iba chaos. Ak by som nočo zmenil tak jedine to aby EduScrum bol celý jeden rok - tým pádom mať viac…	probably yes	4	yes	yes	probably yes	3	rather no
Gymnázium Ľ. Štúra	boy		Neviem	3	5	5	sympatií	10	programoval, riešil otázky	rather yes	no	yes	yes	yes	rather no	yes	rather no	rather yes	rather yes	0	rather no	rather yes	3	3	had a little fun	had a little fun	very much enjoyed				probably yes	rather no	probably yes	rather no			no	probably yes	3	rather no	rather no	probably yes	5	rather no
Gymnázium Ľ. Štúra	girl		forma učenia, kde sa žiaci skôr učia sami a vyhľadávajú si všetky informácie sami, oporu majú len v tíme	2	3	6	dobrých medziľudských vzťahov	7	to čo bolo treba- programovano, hľadano odpovede na otázky... každý člen si vyskúšal všetko	yes	kreatívne som udržovala dobrú náladu v tíme	rather yes	yes	rather yes	yes	yes	rather no	rather no	rather yes	0	rather no	yes	4	2	very much enjoyed	not amused at all	had a little fun				rather no	probably yes	rather no	yes			Podľa mňa pre študentov, ktorí predtým nerobili nič s programovaním toto no je vhodné	rather no	2	yes	probably yes	rather no	3	rather no
Gymnázium Ľ. Štúra	girl		je to forma vzdelávania, v ktorej máme možnosť vzdelávať sa samostatne. podporuje nás k samostatnosti.	3	9	5	ja neviem. proste sme yoskupili ľudí čo sedeli vedľa seba	10	riešila som tázky, programovala a podieĺala sa na tvorbe prezentácie.	yes	programovano je pomerne dosť založené na kreativite aspoň čo sa týka začiatkov, keď je potrebné vymyslieť nápad. Na tejto časti sme sa podielali všetci ale začiatok som odštartovala väčšinou ja.	yes	yes	yes	rather yes	yes	yes	no	yes	0	no	rather yes	5	5	very much enjoyed	not amused at all	very much enjoyed				probably yes	yes	probably yes	yes			bolo zaujímavé vyskúšať nočo nové a vzdelávať sa iným spôsobom. Jediná vec ktorú by som vytkla by bolo nedostatok času a možno veľký skok z app inventora a micro bitu do android studia. No zároveň chápem že tieto veci no je jednoduché a častokrát no je možné zmeniť. V každom prípade by som sa vám chcela poďakovať že ste nám dali možnosť zapojiť sa do tohoto projektu.	probably yes	5	yes	yes	probably yes	8	no
Gymnázium Ľ. Štúra	boy		Forma vyučovania, kde sú študenti rozdelení do skupín a zvolia si vlastného človeka ktorý bude mať na starosti deleno úloh	1	1	6	Na základe dobrej komunikácii a dlhoročnej spolupráci členov tímu	1	Všeobecné, sle najmä programovano	no	Keďže som mal už znalosti programovania tak sa mi ľahšie dizajnovalo a vytváralo aplikácie a mohli byť lepšie	rather yes	yes	yes	Som za yes, ale je probably najdôležitejšie dobre zorganizovať tím, v opačnom prípade to nefunguje	rather no	yes	yes	rather no	4	no	rather no	1	5	had a little fun	very much enjoyed	very much enjoyed				probably yes	no	yes	yes			Keďže programovano je naozaj komplexné, ťažké a náročné na pochopeno je podľa mna veľmi zlé, keď sa to máme naučiť sami. A to nehovoriac o objektovo orientovanom. Podľa mňa metóda eduScram ma budúcnosť ale no úplne v programovaní, minimálne no pri úplných začiatkoch.	yes	5	yes	no	probably yes	1	no
Gymnázium Ľ. Štúra	girl		Vyučovací program	2	3	5	kamaráti	10	Mali sme spoločnú prácu	yes	Snažili sme sa o vytvoreno hry	rather no	rather yes	rather yes	yes	yes	rather no	no	yes	0	rather yes	yes	3	2	had a little fun	not amused at all	had a little fun				no	rather no	no	rather no			Predstavy sa boli oveľa väčšie ako bola realita.	no	2	rather no	rather no	no	3	rather yes
Gymnázium Ľ. Štúra	girl		forma učenia kde študenti sa učia sami a vyhľadávajú si info sami	3	5	5	náhodne	7	otázky a programovano	rather yes	vytvárala som aplikácie	rather yes	yes	yes	yes	rather yes	rather yes	rather no	rather yes	2	rather no	rather yes	5	2	very much enjoyed	not amused at all	very much enjoyed				rather no	probably yes	no	yes			app invetror a micro:bit sú jednoduché ale Android Studio je náročné. Bol to veľký skok. Možno pre vás je to ľahké ale pre nás ani no. Tak isto by ste mali sem tam sa aj spýtať že ako to vidíme my študenti. A no je zlé si sem tam priznať chybu keď sa vám nočo vymkne spod kontroly a my no sme vo vašej hlave takže ak chcete od nás nočo musíte nám to povedať. Ale oceňujem že ste sa vždy snažili pomô…	no	2	yes	probably yes	rather no	5	rather no
Gymnázium Ľ. Štúra	boy		nočo ohľadom formy výučby v oblasti informatiky a programovania	1	4	yes pracoval som v 6 člennom tíme	na základe sympatií	7	snažil som sa pochopiť programovaniu a robil som na samotných aplikáciách ako som len vedel	yes	hrali sme hry (internete) súvisiace s programovaním a to ma bavilo najviac	rather yes	yes	rather yes	rather yes	rather yes	yes	rather no	yes	2	yes	rather yes	1	4	not amused at all	had a little fun	very much enjoyed				no	no	probably yes	yes			Ste fajn típek, trochu viac by bolo vysvetliť o programovaní čo a ako pri začiatkoch hlavne na prvých hodinách ale inak to bolo ok.	probably yes	4	yes	no	no	4	yes
Gymnázium Ľ. Štúra	boy		Vzdelávano bez pomoci učiteľa, v skupinách.	2	2	5	Boli sme voľní.	9	Opravára.	rather yes	Aplikácie	rather no	rather yes	rather no	yes	yes	no	no	rather no	0	yes	rather yes	2	1	not amused at all	had a little fun	had a little fun				no	no	no	no			Trochu viac pomoci by neuškodilo.	no	1	no	no	no	2	yes
Gymnázium Ľ. Štúra	boy		"Učeno" sa programovať	3	4	5	kamaráti	8	všetci sme robili spolu	yes	aplikácie	rather no	rather yes	rather yes	no	rather no	rather no	rather yes	rather yes	0	yes	no	1	1	had a little fun	had a little fun	had a little fun				no	no	probably yes	rather no			Myšlienka takejto výučby na hodine informatiky je dobrá, no realizácia sa mne a môjmu tímu nepáčila. Projekt nám bol predstavený s myšlienkou, že sa naučíme programovať a budeme si môcť spraviť vlastné aplikácie., ale hodiny vyzerali úplne inak. Rozdali nám papiere na ktorých boli úlohy a požiadavky, ktoré od nás chceli, lenže sme nemali žiadne znalosti, ako programovať a len sme odpisovali a kop…
Gymnázium Ľ. Štúra	girl		Vzdelávano bez pomoci učiteľa	2	3	5	Kamarátstva a inteligencie	7	Z každého trochu. Vyskúšala som si robiť všetko.	rather yes	Väčšina vecí bola z tutoriálov	rather yes	rather yes	Je dobré mať nejaký plán ale nokedy no je na škodu sa od neho odkloniť a spraviť nočo spontánne.	yes	rather no	rather yes	no	rather yes	0	rather no	yes	4	1	had a little fun	not amused at all	had a little fun				no	no	no	no			Možno by bolo fajn, menej kritizovať naše práce a prezentácie a brať ohľad na to, že sme to robili prvýkrát a nikto nám nič nevysvetlil, pri čom boli prípady kedy sme zavolali učiteľa a nakonoc sme si to aj tak museli vyriešiť samy.	no	1	no	no	no	3	rather no
Gymnázium Ľ. Štúra	girl		vzdelavano bez pomoci ucitela	4	7	5	Na základe voľby	10	programovala, tvorila prezentácie	yes	Naprogramovala vlastnú aplikáciu, ktorú využívam aj v bežnom živote	yes	rather yes	rather yes	rather yes	rather yes	rather yes	rather yes	yes	3	rather no	rather yes	5	4	very much enjoyed	had a little fun	had a little fun				yes	yes	probably yes	probably yes			vďaka za spríjemneno hodín informatiky	probably yes	4	probably yes	yes	yes	7	rather no
Gymnázium Ľ. Štúra	boy		samostatná práca v skupinách	3	3	5	kamarátstvo	8	programoval a písal otázky	rather yes	skoro nič	rather yes	rather yes	yes	rather yes	yes	rather yes	rather no	yes	4	rather no	yes	4	3	had a little fun	not amused at all	very much enjoyed				rather no	probably yes	rather no	yes			Viac vysvetliť daný program, v ktorom sa programuje.	rather no	3	yes	probably yes	rather no	4	rather no
Gymnázium Ľ. Štúra	girl		občas ale stale tomu dobre nerozumiem.	4	7	5	na základe toho že sme dobre kamaratky	10	väčšinou prezentňacie ale tak trochu všetko	yes	ano prezentácie	yes	yes	yes	rather yes	rather yes	rather yes	rather no	yes	3	rather yes	yes	5	3	very much enjoyed	not amused at all	very much enjoyed				yes	rather no	probably yes	probably yes			lektor bol milý a ústretový. Smažil sa nám pomôcť keď sme nočomu nerozumeli.	probably yes	3	probably yes	rather no	yes	7	rather yes
Gymnázium Ľ. Štúra	girl		Ano vyucovano bez pomocit ucitela	2	2	5	nahodne	8	programovala som aplikacie a hladala odpovede na otazky	yes	aplikacie	neviem	rather yes	rather yes	aj hej aj no	rather no	rather no	rather no	rather yes	0	rather no	rather no	4	3	had a little fun	had a little fun	very much enjoyed				rather no	rather no	rather no	rather no			pomoc by neuskodila	rather no	3	rather no	rather no	rather no	2	rather no
Gymnázium Ľ. Štúra	boy		Samostatná výučba	3	6	5	Tím sme tvorili ako skupina kamarátov	9	Programoval, riešil úlohy	rather yes	Aplikácie	rather yes	yes	yes	rather no	yes	rather no	rather no	rather yes	1	rather yes	rather yes	2	2	had a little fun	not amused at all	very much enjoyed				rather no	rather no	no	yes			Venovať väčšiu pozornosť žiakom, ktorí nevedia o programovaní vôbec nič ako ja. Aspoň vysvetliť úplne základné veci a popísať čo robia. Bolo ťažké sa to všetko naučiť zo všelijakých stryesk a pomerne často meneno programov na programovano.	no	2	yes	rather no	rather no	6	rather yes
Gymnázium Ľ. Štúra	girl		samovýučba podla tutorialov	4	6	5	priatelstva	10	spolupracoval	rather yes	aplikacie	rather yes	rather no	rather yes	yes	rather no	rather yes	rather no	yes	0	rather no	rather yes	4	2	had a little fun	not amused at all	very much enjoyed				no	rather no	no	probably yes			no	no	2	probably yes	rather no	no	6	rather no
Gymnázium Ľ. Štúra	girl		Samovýučba podľa rôznych tutoriálov a článkov	3	5	5	Poznáme sa a dôverujeme si a bývame v blízkosti.	8	V týme sme si prácu rovnoccenne rozdelili a zakaždým sme pracovali na nočom inom	rather yes	nápady na vytvoreno aplikácie	rather yes	yes	yes	rather yes	rather yes	rather yes	rather no			rather yes	rather yes	3	3							probably yes	probably yes
Gymnázium Ľ. Štúra	girl		yes. Samostatná práca, kde sa podľa tutoriálov účíme ako programovať v rôznych aplikáciách.	3	4	5	Pretože sa poznáme a navzájom si dôverujeme a vedeli sme kto je na čo dobrý.	7	My v tíme sme každú novú prácu delili inak, Raz bol nokto scramamster a druhýkrát bol zas nokto iný. Tým pádom sme sa každý naučili ako byť leadrom týmu a mohli si vyskúšať čo je to mať zodpovednosť za tým. Všetci sme sa striedali aj v práci jedny robili prezentáciu druhý otázky a Ďalší aplikáciu a takto sa to menilo.	rather yes	nové nápady ako vylepšiť aplikáciu.	rather yes	yes	yes	yes	rather yes	no	no	rather yes	0	yes	rather yes	2	1	not amused at all	not amused at all	had a little fun				no	no	no	no			Pozitíva: Naučili sme sa spolupracovať. Oboznámili sa s novými aplikáciami . Naučili sa, že programovano pokiaľ do toho nemáš vlohy tak to nejde.
Gymnázium Ľ. Štúra	girl		samovýučba pomocou tutoriálov	2	4	5	priatelstvo	9	aplikacie	yes	aplikacie	rather yes	rather no	rather yes	yes	rather yes	rather yes	rather no			rather yes	rather yes	3	3							probably yes	probably yes
Gymnázium Ľ. Štúra	girl		vyučovací program	1	2	5	kamaráti	10	povzbudozovala, nabádala k lepším výkonom, snažila sa programovať,...	yes	návrh prezentácie	yes	rather yes	yes	yes	rather yes	rather no				rather yes	rather yes	3	3							probably yes	probably yes
Gymnázium Ľ. Štúra	girl		spôsob špeciálneho vyučovania, ktorý sa zameriava na Android	2	3	5	na základe prvotného rozdelenia	7	odpovede na prečo otázky a práca v Android Studio	rather yes	práca v Android Studio tvoreno applikácie Alarm	rather yes	rather yes	rather yes	rather no	rather no	rather yes	rather no	yes	1	rather yes	rather yes	5	3	very much enjoyed	had a little fun	very much enjoyed				rather no	probably yes	probably yes	probably yes			tento spôsob vyučovania sa mi celkom páčil, a myslím, že by sa mohlo robiť takýchto projektov viacej lebo je to podľa môjho názoru zaujímavé pre žiakov. Dané otázky na vypracovano sa mi nepáčili, veľa z nich bolo nepodstatných a nedalo sa ich nikde nájsť.	probably yes	3	probably yes	probably yes	rather no	4	rather yes
Gymnázium Ľ. Štúra	girl		uceno sa samostatne pomocou iternetu a videi, ktore sme si sami nasli na internete	3	6	5	my sme vzdy spolu	10	odpovedala na otazky, programovala aplikacie	rather yes	odpovede na otazky typu ako by sme programovanim zlepsili domace upratovano, alebo vytvarano aplikacii	yes	rather yes	yes	rather yes	rather yes	rather yes	rather no	yes	1	rather no	rather yes	5	3	very much enjoyed	had a little fun	very much enjoyed				probably yes	yes	rather no	yes			urcite by sa zislo uskutocnit tento projekt v druhom polroku kedy by sme mali ake take zakladne znalosti o programovani, na jednotlive sprinty sme mali malo casu, otazky ktore absolutne s tym nesuviseli	rather no	3	yes	yes	probably yes	6	rather no
Gymnázium Ľ. Štúra	girl		Samovýučba na základe nejakého zadania	2	5	V tíme sa mi pracovalo veľmi dobre. Bolo nás 5 girlt.	Na základe nášho kamarátstva	7	Programovla som aplikácie	rather yes	Hlavne dizajn aplikácií.	rather yes	rather yes	yes	rather yes	rather no	rather yes	rather no	yes	1	rather no	rather yes	4	3	very much enjoyed	had a little fun	not amused at all				rather no	probably yes	probably yes	rather no			ďakujeme za vaše rady. možno by ste nabudúce na začiatku mohli vysvetliť aspoň základy programovania.Ďakujeme za váš čas.	probably yes	3	rather no	probably yes	rather no	5	rather no
Stredná odborná škola technická	boy		forma výučbi	2	7	5	priateľstva	8	tvoril aplikácie	rather yes	aplikácie	rather yes	yes	yes	neviem	rather yes	rather yes	rather yes	rather yes	3	no	rather yes	3	2	had a little fun	not amused at all	not amused at all				rather no	no	no	no			Dovidenia	no	2	no	no	rather no		no
Stredná odborná škola technická	boy		Forma výučby	2	9	4	znalosti	8	Vytváral aplikáciu	rather yes	Vytvárano vlastnej aplikácie	yes	rather no	yes	rather no	rather yes	yes	rather yes	rather no	3	rather yes	no	2	4	very much enjoyed	had a little fun	had a little fun				yes	probably yes	rather no	rather no			drž sa	rather no	4	rather no	probably yes	yes		rather yes
Stredná odborná škola technická	boy		Forma výučby	3	8	5	Podľa losovania	8	Tvoril som aplikácie v appinventor alebo micro bit	rather yes	Rôzne aplikácie	rather yes	rather yes	yes	rather no	yes	yes	rather yes	rather yes	3	rather yes	yes	3	4	had a little fun	had a little fun	had a little fun				probably yes	rather no	yes	probably yes			.	yes	4	probably yes	rather no	probably yes		rather yes
Stredná odborná škola technická	boy		yes/Je to program na vychovu mladych ludi	3	10	4	na dobrych vztahoch	10	scrummastera	rather no	nič	rather yes	rather no	rather yes	rather no	rather no	rather yes	yes	no	0	no	rather yes	5	5	had a little fun	not amused at all	very much enjoyed				rather no	rather no	rather no	yes			Ľubim ho <3	yes	1	yes	yes	yes		yes
Stredná odborná škola technická	boy		Forma výučby	3	5	4	Náhody	7	Programoval	rather no	ano, aplikáie	neviem	rather yes	rather yes	neviem	rather yes	yes	no	rather no	0	no	rather yes	3	4	very much enjoyed	not amused at all	had a little fun				probably yes	rather no	no	no			no	no	4	no	rather no	probably yes		no
Stredná odborná škola technická	boy		ANO	5	8	5	Vedomosti	9	programoval aplikacie	rather no	no	rather yes	rather yes	yes	yes	rather yes	yes	rather yes	yes	0	rather no	yes	3	2	had a little fun	had a little fun	not amused at all				rather no	probably yes	probably yes	probably yes			zlepšiť spoluprácu	probably yes	2	probably yes	probably yes	rather no		rather no
Stredná odborná škola technická	boy		Je to forma výučby, ana učil som sa.	4	9	4	Náhoda	9	Aplikácie	yes	Ano, aplikácie had, kresleno, space invader	rather yes	rather yes	yes	neviem	yes	yes	yes	yes	3	no	rather yes	4	5	had a little fun	very much enjoyed	had a little fun				probably yes	rather no	probably yes	rather no			Poznáte Vlada Voštinára?	probably yes	5	rather no	rather no	probably yes		no
Stredná odborná škola technická	boy		nwm	2	4	4	Kamoštva	8													rather yes	rather yes	3	3							probably yes	probably yes
Stredná odborná škola technická	boy		programovano	2	4	4	znalosti	5	programoval	rather yes	no	rather yes	rather no	rather yes	rather no	yes	rather yes	rather yes	rather yes	2	yes	no	1	3	had a little fun	not amused at all	had a little fun				yes	probably yes	probably yes	rather no			ste super	yes	2	probably yes	rather no	probably yes		yes
Stredná odborná škola technická	boy		dačo	2	8	5	na základe komunikácie	10	robil som troška	yes	robil som vlastnú appku, ale po chvíli ma to už nebavilo	rather yes	rather yes	rather yes	rather yes	rather yes					rather yes	rather yes	3	3							probably yes	probably yes
Stredná odborná škola technická	boy		dačo	2	8	5	na základe komunikácie	10	robil som troška	yes	robil som vlastnú appku, ale po chvíli ma to už nebavilo	rather yes	rather yes	rather yes	rather yes	rather yes					rather yes	rather yes	3	3							probably yes	probably yes
Stredná odborná škola technická	boy		forma výučby	3	10	5	vedomostí	10	scram Master	rather yes	kalkulačka, pong ball, piano	yes	rather yes	rather yes	rather no	rather yes	yes	rather yes	yes	4	rather yes	yes	5	4	had a little fun	had a little fun	had a little fun				probably yes	probably yes	probably yes	probably yes			dokonalý učiteľ	probably yes	4	probably yes	probably yes	probably yes		rather yes
Stredná odborná škola technická	boy		yes/učiť sa v programovaní	3	5	4	Na základe lásky	10	kalkulačku,hru,skicár	rather yes	no	rather yes	rather no	yes	rather no	rather yes	rather no	no	yes	0	no	rather yes	3	3	had a little fun	not amused at all	very much enjoyed				rather no	rather no	rather no	yes			Máš peknú skoda octaviu	rather no	3	yes	rather no	rather no		no
Gymnázium M. Rúfusa	boy		Práca v týmoch, striedano leadra tímu.	4	8	4	Kapitáni si volili svojich členov	10	programoval	rather yes	vymýšľal aplikáciu	yes	yes	yes	rather yes	yes	rather yes	yes			rather yes	rather yes	3	3							probably yes	probably yes
Gymnázium M. Rúfusa	boy		Aplikovano fungovania cechu, čo je produktívne.	4	9	4	Na základe podmienok, ktoré určili vyučujúci.	8	Koordinoval som názory.	yes	Riešenia.	yes	yes	yes	Závisieť to môže od vyučovacieho priebehu, ktorého činiteľm sú práve vzdelávaní - študenti.	yes	yes	no	yes		rather yes	rather yes	3	3							probably yes	probably yes
Gymnázium Ľ. Štúra	boy		forma výučby	4	8	5	kamarátstvo	9	programoval	rather yes	aplikácie	rather yes	rather yes	rather yes	rather yes	yes					rather yes	rather yes	3	3							probably yes	probably yes
Gymnázium Ľ. Štúra	girl		vyučovacia metóda	4	8	5	ako sme chceli	10	úlohy	rather yes	programovala som aplikácie	yes	rather yes	yes	yes	yes	rather yes	rather yes	rather yes	0	yes	yes	5	3	very much enjoyed	not amused at all	very much enjoyed				yes	probably yes	rather no	yes			n	rather no	3	yes	probably yes	yes		yes
Gymnázium Ľ. Štúra	girl		spôsob vyučovania	5	10	5	ako sme chceli	10	programoval	yes	programoval hry	yes	yes	yes	yes	yes	yes	yes	yes	3	no	yes	5	5	very much enjoyed	not amused at all	very much enjoyed				yes	probably yes	no	probably yes			nič	no	4	probably yes	probably yes	yes		no
Gymnázium M. Rúfusa	boy		forma výučby	4	8	4	náhoda, losovano,	8	plyesval úlohy, testoval	yes	programoval aplikacie	yes	yes	rather yes	rather yes	yes	yes	yes	yes	5	yes	yes	5	4	very much enjoyed	not amused at all	very much enjoyed				probably yes	yes	no	yes			n	yes	5	probably yes	yes	probably yes		yes
Gymnázium M. Rúfusa	boy		výučba	5	10	4	losovano	10	testoval, programoval	rather no	programoval	yes	yes	yes	yes	yes	yes	yes	rather yes	0	rather yes	rather yes	5	5	very much enjoyed	not amused at all	very much enjoyed				yes	probably yes	no	probably yes			super	no	5	probably yes	probably yes	yes		rather yes
Stredná odborná škola technická	boy		samoštúdium	3	5	4	priateľstva	6	testoval	rather yes	programoval	rather yes	rather yes	rather yes	rather yes	yes	yes	rather yes	rather yes	0	rather no	rather no	4	4	very much enjoyed	not amused at all	very much enjoyed				yes	yes	no	probably yes			nič	no	4	probably yes	yes	yes		rather no
Stredná odborná škola technická	boy		forma výučby	4	7	5	kamarátstvo	8	programoval	rather yes	vytváral som hry	yes	yes	yes	yes	yes	yes	yes	yes	1	rather yes	rather yes	4	3	very much enjoyed	not amused at all	very much enjoyed				yes	yes	no	yes			len tak Ďalej	no	3	yes	yes	yes		rather yes
Gymnázium Andreja Sládkoviča	boy		typ výučby	5	10	3	podľa toho koho som poznal	10	programoval	yes	hry, aplikácie	yes	yes	yes	yes	yes	yes	yes	yes	0	rather yes	yes	5	5	very much enjoyed	had a little fun	very much enjoyed				yes	yes	yes	yes			len tak Ďalej	yes	5	yes	yes	yes		rather yes
Gymnázium Andreja Sládkoviča	boy		výučba	5	10	3	známosť	9	programoval, testoval	rather yes	programy	rather yes	rather yes	rather yes	rather yes	yes	rather yes	rather yes	rather no	0	rather yes	rather yes	5	4	very much enjoyed	had a little fun	very much enjoyed				yes	yes	yes	yes			pokračovať vo výučbe	yes	4	yes	yes	yes		rather yes
Gymnázium Andreja Sládkoviča	boy		samoštúdium	4	8	3	známosť	8	testoval, vypracovával otázky	rather yes	testoval, vypracovával otázky	rather yes	rather yes	rather yes	rather yes	yes	rather yes	rather yes	rather yes	4	rather yes	rather yes	4	4	had a little fun	not amused at all	had a little fun				yes	probably yes	probably yes	yes			:)	probably yes	4	yes	probably yes	yes		rather yes
Gymnázium Andreja Sládkoviča	boy		forma výučby	3	5	2	kamarátstvo	6	programoval	rather yes	hry	rather yes	rather yes	rather yes	rather yes	yes	rather yes	rather yes	yes	0	rather yes	rather yes	4	3	had a little fun	not amused at all	had a little fun				yes	probably yes	probably yes	yes			nič	probably yes	3	yes	probably yes	yes		rather yes
Gymnázium Andreja Sládkoviča	boy		výučba	4	7	2	kamarátstvo	3	nič	rather no	nič	rather yes	rather yes	rather yes	rather yes	rather yes	rather no	rather no	rather no	0	no	no	5	4	had a little fun	not amused at all	had a little fun				rather no	rather no	rather no	rather no			a	rather no	4	rather no	rather no	rather no		no
Stredná odborná škola technická	boy		Forma	5	7	3.4	Výber	9	Možné aj nemožné	yes	Prezentácie	rather yes	yes	yes	no	yes	rather yes	rather yes	rather no	3	rather yes	yes	2	3	had a little fun	not amused at all	very much enjoyed				probably yes	yes	yes	yes			Bolo mi cťou	probably yes	3	yes	yes	no		rather yes
Stredná odborná škola technická	boy		Nikdy som o tom nepočul	4	5	2	Nevytvorili	8	Nič	yes	Nič	rather yes	rather yes	yes	rather no	rather yes	rather yes	rather yes	rather no	3	rather no	yes	2	2	not amused at all	had a little fun	had a little fun				probably yes	no	probably yes	probably yes			Chcem skúsiť eduScrum	probably yes	2	probably yes	no	probably yes		rather no
Stredná odborná škola technická	boy		Nový spôsob učenia	5	8	4	Na základe výberu vlastností jednotlivých členou.	8	organyzoval	yes	aplikácie	rather yes	yes	yes	rather yes	yes	yes	yes	yes	0	rather yes	yes	4	5	had a little fun	had a little fun	very much enjoyed				probably yes	yes	yes	yes			Je to výborná spôsob vyučovania :)	yes	5	yes	yes	yes		rather yes
Univerzita Mateja Bela v Banskej Bystrici	girl		aynol	2	6	54	ano	8	daasa	rather no	no	no	yes	yes	yes	rather yes	rather yes	rather yes	rather yes	5	rather yes	yes	5	4	very much enjoyed	not amused at all	very much enjoyed				no	yes	no	yes			bolo dobre haha xd <3	no	5	yes	yes	no		yes
Stredná odborná škola technická	boy		eduScrum	2	3	4	rozkazu	2	programoval	rather yes	programovano	rather no	rather no	rather no	rather no	rather no	rather no	rather no	rather no	1	rather no	rather no	2	2	not amused at all	not amused at all	not amused at all				rather no	rather no	rather no	rather no			táto otázka je povinná	rather no	2	rather no	rather no	rather no		rather no
Stredná odborná škola technická	boy		neviem čo to je	4	5	3	zivotopisu	6	programoval	rather yes	určite ano napriklad mikrobitom	rather yes	rather yes	rather yes	rather no	no	no	no	no	2	rather no	no	4	5	had a little fun	very much enjoyed	had a little fun				rather no	yes	no	yes			dakujem	no	5	yes	yes	no		rather no
Stredná odborná škola technická	boy		neviem	1	1	252	podla ničoho	5	prišiel som do školy	yes	hral som hacknute hry	ako kedy podla toho kolko spím	ku-pussy yami ngokuphelele	čo ja viem podla toho kde ale na technickej určite no	それは完全に私の猫の中にあります	rather no	rather yes				rather yes	rather yes	3	3							probably yes	probably yes
Stredná odborná škola technická	boy		Vzájomná práca v tímoch, a samovýučba	3	6	4	Náhodne si nás volili lídri tímov.	7	Programoval a pracoval na prezentácii	yes	Programoval som aplikácie a kompletizoval prezentáciu	rather no	rather no	yes	Je to iné, ale hore nohami no. no je to až také zlé, je to nočo nové.	rather yes	rather yes	yes	yes	2	rather no	yes	5	5	very much enjoyed	had a little fun	very much enjoyed				probably yes	yes	rather no	probably yes			Boli ste ochotný nám vždy pomôcť, ďakujeme..	rather no	5	probably yes	yes	probably yes		rather no
Stredná odborná škola technická	boy		na zá	4	9	4	na základe vlastností ludí	8	aplikácie a microbit	rather yes	robil som aplikácie	rather yes	yes	rather yes	rather no	yes	rather yes	yes	rather yes	3	rather yes	yes	5	4	very much enjoyed	had a little fun	very much enjoyed				probably yes	probably yes
Stredná odborná škola technická	boy		učil je to super vec a odporučam učit touto formou	5	10	3	Na zaklade schopnistí	10	robil som prace	yes	ano	yes	yes	yes	no	yes	yes	yes	yes	4	rather yes	yes	5	5	very much enjoyed	had a little fun	very much enjoyed				rather no	yes	rather no	yes			bolo to super	probably yes	5	yes	yes	probably yes		rather no
Gymnázium Ľ. Štúra	girl		neviem	1	1	39	no tak my sme nemohli takze som nahnevany	1	hral som tiež hry ale iba hacknute	yes	hladal hacknute hry	ale piču	fuuu	Ek drink die hele skool, want dit is 'n tegnose tegnok	你吃了我的雞巴	no	no	no	no	0	rather no	no	3	5	not amused at all	not amused at all	not amused at all				probably yes	probably yes
Stredná odborná škola technická	boy		naučiť sa základy programovania	1	5	4	tímy boli tvorené výberom jednotlivcov ktorý boli leadermi tímu a oni si vyberali členov svojho tímu	7	vytváral aplikácie a pracoval s microbitmi ako aj programovano lego mindstorming	rather yes	tvoril som aplikácie teda programoval a zároveň tvoril robota z lega ktorého sme neskôr programovali	rather no	yes	yes	rather yes	rather yes	rather yes	rather no	rather yes	1	rather no	rather yes	1	3	not amused at all	not amused at all	had a little fun				rather no	no	no	no			no	no	3	no	no	rather no		rather no
Stredná odborná škola technická	boy		Cyklus	4	9	3	Na základe princípov morálky a slušnosti som si nemohol dovoliť nechať mojich menej intelektuálne vyspelých spolužiakov pracovať samých.	10	Programovano	yes	Všetko čo som považoval za prínosné pre fungovano tímu.	yes	yes	yes	rather no	rather yes	yes	rather yes	yes	3	no	yes	5	5	very much enjoyed	very much enjoyed	very much enjoyed				yes	yes	yes	yes			good job	yes	5	yes	yes	yes		no
Stredná odborná škola technická	boy		forma výučby	5	9	3.4	výberu pomocou vlastností, ktoré zadal vyučujúci	10	aplikácie, programovano	yes	aplikácie	yes	yes	yes	yes	yes	yes	yes	yes	4	rather no	yes	5	4	very much enjoyed	very much enjoyed	very much enjoyed				yes	yes	rather no	yes			super	rather no	4	yes	yes	yes		rather no
Stredná odborná škola technická	boy		vyucba v time	5	10	3.4	vlastnosti	10	programoval	yes	hry	yes	yes	yes	yes	yes	yes	yes	yes	5	rather no	yes	5	5	very much enjoyed	very much enjoyed	very much enjoyed				yes	yes	probably yes	yes			super	probably yes	5	yes	yes	yes		rather no
Gymnázium M. Rúfusa	boy		Forma vyucby	5	10	4	Podla nahody	7	Scrummaster	rather yes	Programovano	yes	rather yes	rather yes	yes	yes	yes	yes	rather yes	3	rather no	yes	4	5	very much enjoyed	very much enjoyed	had a little fun				yes	yes	yes	rather no			Super hodiny	yes	5	rather no	yes	yes		rather no
Gymnázium M. Rúfusa	girl		dobré	3	6	4	náhodného výberu	10	programovala	yes	robila som s arduinom	rather yes	rather no	rather yes	rather no	yes	rather yes	rather no	yes	3	rather yes	rather yes	4	4	had a little fun	had a little fun	had a little fun				rather no	rather no	rather no	rather no			probably no	rather no	4	rather no	rather no	rather no		rather yes
Gymnázium M. Rúfusa	boy		moderne techniky	3	4	2	kamaratstva	8	programoval v aplikacii	rather yes	nerobil	rather yes	rather yes	rather no	rather no	rather yes	rather yes	rather no	rather yes	2	rather yes	rather no	3	3	had a little fun	had a little fun	very much enjoyed				rather no	probably yes	rather no	probably yes			dakujem vam za spolupracu :P	rather no	3	probably yes	probably yes	rather no		rather yes
Gymnázium M. Rúfusa	boy		forma výučby pomocou modernej techniky	4	9	boli sme štyria	na základe toho ,že sa bavime aj mimo informatiky	7	pomáhal som kódovať ,hladal som tutorialy na nete.	rather no	pracoval som	yes	rather yes	rather yes	rather no	yes	rather yes	yes	yes	3	rather yes	yes	4	3	very much enjoyed	had a little fun	very much enjoyed				yes	yes	probably yes	probably yes			ďakujeme za váš čas a úsilie ,taktiež za vašu schopnosť pomáhať nám ,aj keď nás to občas nebavilo	probably yes	3	probably yes	yes	yes		rather yes
Gymnázium M. Rúfusa	boy		forma výučby	4	9	4	Náhodne	8	programoval	yes	yes. Vymýšľal som čo ideme robiť	rather yes	rather yes	rather yes	rather yes	rather yes	yes	yes	yes	2	rather no	rather yes	4	4	very much enjoyed	had a little fun	very much enjoyed				yes	probably yes	rather no	yes			no	rather no	4	yes	probably yes	yes		rather no
Gymnázium M. Rúfusa	girl		moderne techniky	3	6	4	nahodny vyber	10	programovano	yes	neviem	rather yes	neviem	yes	neviem	yes	rather yes	no	yes	3	rather yes	rather yes	3	3	had a little fun	had a little fun	very much enjoyed				yes	yes	no	yes			no	no	3	yes	yes	yes		rather yes
Gymnázium M. Rúfusa	girl		forma vyučovania	4	8	4	náhoda	10	dizajn	yes	no	rather yes	rather yes	rather yes	rather yes	rather yes	rather yes	rather yes	rather yes	4	rather yes	yes	5	5	very much enjoyed	very much enjoyed	very much enjoyed				yes	yes	yes	yes			ste super	probably yes	5	yes	yes	yes		rather yes
Gymnázium M. Rúfusa	girl		Pán Vostinar nás neucil obycajnym spôsobom, ale väčšinou nás nechal pracovať samich	3	8	4	Náhodné	9	Otázky a trochu programovania	rather yes	Vytvárano aplikacii	yes	no	rather yes	rather yes	yes	rather yes	rather yes	yes	5	rather yes	rather yes	4	3	had a little fun	had a little fun	very much enjoyed				yes	yes	yes	yes			Takého učiteľa by som si nechala na učeno....	yes	3	yes	yes	yes		rather yes
Gymnázium M. Rúfusa	girl		pán profesor nás neučil typickým spôsobom, ale väčšinou sme pracovali sami	4	7	4	náhodne	9	otázky a trochu programovano	yes	vytvárano aplikácie	yes	rather no	yes	rather yes	yes	yes				rather yes	rather yes	3	3							probably yes	probably yes
Gymnázium M. Rúfusa	girl		forma výučby	3	7	4	prinútili nás	8	trochu zo všetkého	rather yes	create app aplikácie	rather yes	rather yes	rather yes	rather no	rather yes	yes	yes	yes	1	rather no	rather yes	5	4	had a little fun	not amused at all	had a little fun				probably yes	yes	probably yes	yes			neviem	probably yes	4	yes	yes	probably yes		rather no
Gymnázium M. Rúfusa	girl		neviem	3	6	4	vedomostí	10	prečo otázky	yes	no	neviem	rather yes	rather no	neviem	rather no	rather no	no	rather yes	0	rather no	rather yes	2	2	not amused at all	not amused at all	not amused at all				rather no	rather no	rather no	rather no			nenechavajte nas tu s........	rather no	2	rather no	rather no	rather no		rather no
Gymnázium M. Rúfusa	boy		Systém výučby	4	9	4	Rozne- anonymne, losovanim	10	Programovano,aplikacie	yes	Stale noco	yes	yes	yes	yes	yes	yes	rather yes	yes	4	rather no	yes	5	4	very much enjoyed	we didn't do it with him	very much enjoyed	very much enjoyed	we didn't do it with him	very much enjoyed	yes	probably yes	I don't know, I haven't done	probably yes	probably yes	I don't know, I haven't done	Nic
Gymnázium M. Rúfusa	boy		Sposob vyucby	4	9	4	Anonymne	9	Prezentacie, programovano, vymyslano napadov	yes		rather yes	yes	yes	yes	rather yes	rather yes	rather yes	yes	4	rather no	yes	5	4	very much enjoyed	we didn't do it with him	very much enjoyed	very much enjoyed	we didn't do it with him	had a little fun	yes	yes	I don't know, I haven't done	probably yes	yes	I don't know, I haven't done
Gymnázium M. Rúfusa	boy		Pvyucovano v timoch	4	9	4	Na zaklade vyplnenych vlastnosti	10	Kod	yes		yes	yes	yes	rather yes	yes	rather yes	rather yes	yes	3	rather no	yes	5	3	very much enjoyed	we didn't do it with him	very much enjoyed	very much enjoyed	we didn't do it with him	very much enjoyed	probably yes	probably yes	I don't know, I haven't done	yes	yes	I don't know, I haven't done
Gymnázium M. Rúfusa	boy		Vyucba v timoch	5	10	4	Anonymne	10	Zo vsetkeho trosku	rather yes	Vlastne ulohy	rather yes	yes	yes	yes	rather yes	yes	yes	yes	3	rather no	yes	4	4	very much enjoyed	we didn't do it with him	had a little fun	very much enjoyed	we didn't do it with him	had a little fun	probably yes	yes	I don't know, I haven't done	probably yes	probably yes	I don't know, I haven't done
Gymnázium M. Rúfusa	boy		Sposob ako prebieha vyucovano inak	5	10	4	Na zaklade kvalit a vlastnosti- papiera	8	Vsetko	yes	Stále nočo	yes	yes	yes	yes	rather yes	rather yes	yes	yes	5	rather yes	yes	5	5	had a little fun	we didn't do it with him	very much enjoyed	very much enjoyed	we didn't do it with him	had a little fun	probably yes	probably yes	I don't know, I haven't done	probably yes	probably yes	I don't know, I haven't done
Gymnázium M. Rúfusa	boy		Iná výučba ako na predchádzajúcich hodinách informatiky	4	9	4	Na základe papiera od učiteľa	7	Prezentácie na demo hodinu, otázky, hľadano riešení	rather yes		rather yes	rather yes	rather yes	rather yes	yes	rather yes	rather yes	yes	3	rather no	yes	5	3	very much enjoyed	we didn't do it with him	had a little fun	very much enjoyed	we didn't do it with him	had a little fun	yes	yes	I don't know, I haven't done	yes	yes	I don't know, I haven't done
Gymnázium M. Rúfusa	girl		Typ výučby	5	9	4	Podľa našich vlastností	9	Aplikácie, hry	yes	Prezentácie, stránku projektu, vlastné mobilné aplikácie	yes	yes	yes	yes	yes	rather yes	rather yes	yes	2	rather no	yes	5	5	very much enjoyed	we didn't do it with him	had a little fun	had a little fun	we didn't do it with him	had a little fun	yes	yes	I don't know, I haven't done	yes	yes	I don't know, I haven't done
Gymnázium M. Rúfusa	girl		Metoda vyucby	4	7	4	Podla papierov od ucitela	8	Teoriu a programovano	rather yes		yes	yes	rather yes	rather yes	yes	rather yes	yes	yes	2	no	yes	5	4	very much enjoyed	we didn't do it with him	very much enjoyed	very much enjoyed	we didn't do it with him	had a little fun	yes	yes	I don't know, I haven't done	yes	yes	I don't know, I haven't done
Gymnázium M. Rúfusa	girl		Metóda výučby	4	7	4	Kvality a schopnosti	8	Zabavu, programovano	rather yes	Grafiku aplikacie	yes	yes	rather yes	yes	rather yes	rather yes	rather yes	yes	1	no	yes	4	4	very much enjoyed	we didn't do it with him	very much enjoyed	very much enjoyed	we didn't do it with him	had a little fun	probably yes	probably yes	I don't know, I haven't done	probably yes	probably yes	I don't know, I haven't done
Gymnázium M. Rúfusa	girl		Praca v time, prezentacia cielov, speinty…	4	8	4	Kvality - papier	9	Aplikáciu, stránku	rather yes		rather yes	yes	rather yes	rather yes	yes	yes	rather yes	yes	1	yes	yes	4	4	very much enjoyed	we didn't do it with him	very much enjoyed	very much enjoyed	we didn't do it with him	had a little fun	probably yes	probably yes	I don't know, I haven't done	probably yes	probably yes	I don't know, I haven't done
Gymnázium M. Rúfusa	girl		Metóda výučby	4	9	4	Papiere od učiteľa	9	Na vsetkom som spolopracovala	rather yes		yes	yes	yes	yes	yes	yes	yes	yes	0	no	yes	4	4	very much enjoyed	we didn't do it with him	very much enjoyed	very much enjoyed	we didn't do it with him	had a little fun	yes	yes	I don't know, I haven't done	yes	yes	I don't know, I haven't done
Gymnázium M. Rúfusa	girl		Výučba v tíme	4	8	4	Podľa vyplnených papierov o našich schopnostiach	9	Aplikácie a hry	yes		yes	yes	yes	yes	yes	yes	rather yes	yes	1	no	yes	5	4	very much enjoyed	we didn't do it with him	had a little fun	very much enjoyed	we didn't do it with him	had a little fun	yes	yes	I don't know, I haven't done	probably yes	yes	I don't know, I haven't done
Gymnázium M. Rúfusa	girl		Metóda vyučovania	5	6	4	Schopnosti - anonymnym vyberom	9	Prezentácie, stránku, aplikáciu	rather yes		yes	yes	yes	rather yes	yes	rather yes	rather no	yes	2	rather yes	yes	5	4	very much enjoyed	we didn't do it with him	had a little fun	very much enjoyed	we didn't do it with him	had a little fun	probably yes	probably yes	I don't know, I haven't done	probably yes	probably yes	I don't know, I haven't done
Gymnázium M. Rúfusa	girl		Výučba	4	8	4	Kvalit a schopnosti	8	Vsetko	rather yes	Vsetko bolo kreativne	yes	yes	rather yes	yes	yes	rather yes	yes	yes	2	yes	yes	5	4	very much enjoyed	we didn't do it with him	had a little fun	had a little fun	we didn't do it with him	had a little fun	probably yes	probably yes		probably yes	probably yes	I don't know, I haven't done
Gymnázium M. Rúfusa	girl		Forma výučby	5	8	4	Našich schopností	8	Aplikácie	yes		yes	yes	yes	yes	yes	yes	yes	yes	1	no	rather yes	5	3	very much enjoyed	we didn't do it with him	very much enjoyed	very much enjoyed	we didn't do it with him	very much enjoyed	yes	yes	I don't know, I haven't done	yes	yes	I don't know, I haven't done
Gymnázium M. Rúfusa	girl		Formy výučby	5	10	3	Kvalit a schopnosti	9	Aplikaciu, otázky, prezentáciu	yes		yes	yes	yes	yes	yes	yes	yes	yes	4	no	yes	5	4	very much enjoyed	we didn't do it with him	very much enjoyed	very much enjoyed	we didn't do it with him	not amused at all	yes	yes	I don't know, I haven't done	yes	yes	I don't know, I haven't done
Gymnázium M. Rúfusa	girl		Metóda vyučovania	5	9	3	Podľa vyplnených papierov na začiatku roka	9	Zo všetkého trošku :)	yes		yes	yes	yes	yes	yes	rather yes	rather no	yes	2	rather yes	rather yes	4	4	very much enjoyed	we didn't do it with him	very much enjoyed	very much enjoyed	we didn't do it with him	had a little fun	yes	yes	I don't know, I haven't done	yes	yes	I don't know, I haven't done
Gymnázium M. Rúfusa	girl		Vyčovano v tímoch	5	10	3	V úvode roka	9	Stále nočo	rather yes		rather yes	rather yes	rather yes	yes	yes	yes	yes	yes	2	rather yes	yes	5	4	very much enjoyed	we didn't do it with him	had a little fun	very much enjoyed	we didn't do it with him	had a little fun	probably yes	probably yes	I don't know, I haven't done	probably yes	probably yes	I don't know, I haven't done
Gymnázium M. Rúfusa	girl		Vyučovano odborníkom z praxe	4	8	4	V uvode nejaky papierik sme vyplnali	10	Zo vsetkeho noco	yes		yes	yes	yes	yes	yes	rather yes	rather no	yes	1	rather yes	rather yes	5	4	very much enjoyed	we didn't do it with him	very much enjoyed	very much enjoyed	we didn't do it with him	very much enjoyed	yes	probably yes	I don't know, I haven't done	probably yes	probably yes	I don't know, I haven't done
Gymnázium M. Rúfusa	boy		samovýučba pomocou tutoriálov v skupinách	5	8	3.4	Kvality - papier	9	robil som iba podľa zadaní	rather yes	nápady na vytvoreno aplikácie	yes	yes	yes	yes	yes	rather yes	yes	yes	4	rather yes	yes	5	4	very much enjoyed	we didn't do it with him	very much enjoyed	very much enjoyed	we didn't do it with him	had a little fun	probably yes	yes	I don't know, I haven't done	probably yes	yes	I don't know, I haven't done
Gymnázium M. Rúfusa	boy		spôsob výučby	5	9	3 a 4	papierov od učiteľa - probably schopnosti to boli	9	programoval, robil úlohy	rather yes	vymýšľal obsah úloh	rather yes	yes	yes	yes	yes	yes	yes	yes	4	rather yes	yes	5	5	very much enjoyed	we didn't do it with him	very much enjoyed	very much enjoyed	we didn't do it with him	very much enjoyed	yes	yes	I don't know, I haven't done	yes	yes	I don't know, I haven't done
Gymnázium M. Rúfusa	boy		forma výučby	5	10	3.4	najprv podľa kvalít a potom si ma vybrali do tímu	9	programovano	yes		yes	yes	yes	yes	yes	yes	yes	yes	4	yes	yes	5	5	very much enjoyed	we didn't do it with him	had a little fun	very much enjoyed	we didn't do it with him	had a little fun	probably yes	yes	I don't know, I haven't done	yes	yes	I don't know, I haven't done
Gymnázium M. Rúfusa	girl		to ako, sme sa učili - skupiny, úlohy, prezentácie...	5	8	3.4	podľa kvalít a schopností	10	všetci sme nočo robili	yes		yes	yes	yes	yes	yes	yes	yes	yes	4	yes	yes	5	5	very much enjoyed	we didn't do it with him	very much enjoyed	very much enjoyed	we didn't do it with him	very much enjoyed	yes	yes	I don't know, I haven't done	yes	yes	I don't know, I haven't done
Gymnázium M. Rúfusa	girl		učiteľ neprednáša, iba nás vedie a pomáha	5	9	4	Vzdy si styria ludia vyberali tím, nahodne cez papieriky	9	scrum mastera, logika aplikácií	yes	Vymýšľano aplikácii a zaujímavých nápadov.	yes	yes	yes	yes	yes	yes	rather yes	rather yes	4	rather yes	yes	5	4	very much enjoyed	we didn't do it with him	very much enjoyed	very much enjoyed	we didn't do it with him	very much enjoyed	yes	yes	I don't know, I haven't done	probably yes	probably yes	I don't know, I haven't done
Gymnázium M. Rúfusa	boy		výučba v skupinách, kde je učiteľ iba kouč	5	9	4	kvalít a schopností a potom losovano neskôr	9	scrum master, logiku, programovano, otázky	yes	vymýšľal logiku aplikácií	yes	yes	yes	yes	rather yes	rather yes	rather yes	rather yes	4	rather yes	yes	5	5	very much enjoyed	we didn't do it with him	had a little fun	had a little fun	we didn't do it with him	had a little fun	yes	yes	I don't know, I haven't done	yes	yes	I don't know, I haven't done
Gymnázium M. Rúfusa	boy		spôsob ako sme sa učili	5	10	4	losovano, podľa papierov od učiteľa	10	logiku, aplikácie, scrum master	rather yes	všetko bolo kreatívne	yes	yes	yes	yes	yes	yes	rather yes	yes	3	yes	yes	5	4	very much enjoyed	we didn't do it with him	very much enjoyed	very much enjoyed	we didn't do it with him	very much enjoyed	probably yes	probably yes	I don't know, I haven't done	probably yes	probably yes	I don't know, I haven't done
Gymnázium M. Rúfusa	boy		spôsob ako sme sa učili	5	9	štyria	na základe takého papiera, čo sme vypĺňali	9	logiku a programovano aplikácií	yes	celý čas to bolo kreatívne	yes	yes	yes	yes	yes	yes	yes	yes	5	rather yes	yes	5	5	very much enjoyed	we didn't do it with him	very much enjoyed	very much enjoyed	we didn't do it with him	very much enjoyed	probably yes	probably yes	I don't know, I haven't done	probably yes	probably yes	I don't know, I haven't done
Gymnázium M. Rúfusa	girl		spôsob ako sme sa učili	4	7	štyria	kamarátstvo, predtým na základe takého papiera	10	vypracovával otázky a robil na úlohách	yes	vymýšľal o čom budú aplikácie/hry	yes	yes	yes	yes	rather yes	rather yes	rather yes	rather yes	3	yes	yes	5	5	very much enjoyed	we didn't do it with him	very much enjoyed	very much enjoyed	we didn't do it with him	very much enjoyed	probably yes	probably yes
Gymnázium M. Rúfusa	boy		systém výučby	5	10	4	kamarátstvo, papiere od učiteľa, čo sme vypĺňali	10	v každom šprinte nočo - programovano, logiku, otázky...	yes	logiku hier	yes	yes	yes	yes	yes	yes	rather yes	rather yes	3	rather yes	yes	5	5	very much enjoyed	we didn't do it with him	had a little fun	had a little fun	we didn't do it with him	had a little fun	probably yes	probably yes	I don't know, I haven't done	probably yes	probably yes	I don't know, I haven't done
Gymnázium M. Rúfusa	girl		to ako sme sa učili - učiteľ pomáhal a nevysveľoval	5	10	4	kamarátstva, schopností	9	robila som prezentácie, vypracovávala otázky, programovalova	yes	programovalova	yes	yes	yes	yes	rather yes	rather yes	rather yes	rather yes	3	yes	yes	5	3	had a little fun	we didn't do it with him	had a little fun	very much enjoyed	we didn't do it with him	had a little fun	probably yes	probably yes	I don't know, I haven't done	probably yes	probably yes	I don't know, I haven't done
Gymnázium M. Rúfusa	boy		spôsob výučby v tímoch	4	9	4	kamarátstvo	9	programovano	yes		yes	yes	yes	yes	rather yes	rather yes	rather yes	rather yes	3	rather yes	yes	4	3	very much enjoyed	we didn't do it with him	very much enjoyed	very much enjoyed	we didn't do it with him	had a little fun	probably yes	probably yes	I don't know, I haven't done	probably yes	probably yes	I don't know, I haven't done
Gymnázium M. Rúfusa	girl		spôsob akým sme sa učili	3	6	4	papiere od učitela	9	aplikácie	rather yes	stále nočo	rather yes	rather yes	rather yes	rather yes	rather yes	rather yes	rather yes	rather yes	3	yes	yes	4	3	very much enjoyed	we didn't do it with him	had a little fun	had a little fun	we didn't do it with him	had a little fun	probably yes	probably yes	I don't know, I haven't done	probably yes	probably yes	I don't know, I haven't done
Gymnázium M. Rúfusa	girl		to ako sme sa učili	3	8	4	učiteľ nás rozdelil podľa vyplnených papierov	8	prezentácie, aplikácie	rather yes	všetko bolo kreatívne	rather yes	rather yes	rather yes	rather yes	rather yes	rather yes	rather yes	rather yes	3	yes	yes	4	3	very much enjoyed	we didn't do it with him	very much enjoyed	had a little fun	we didn't do it with him	had a little fun	probably yes	probably yes	I don't know, I haven't done	probably yes	probably yes	I don't know, I haven't done
Gymnázium M. Rúfusa	girl		forma výučby	3	6	4	podľa učiteľa	8	aplikácie	rather yes		yes	yes	yes	yes	yes	yes	yes	yes	3	rather yes	yes	4	4	very much enjoyed	we didn't do it with him	had a little fun	very much enjoyed	we didn't do it with him	had a little fun	probably yes	probably yes	I don't know, I haven't done	probably yes	probably yes	I don't know, I haven't done
Gymnázium M. Rúfusa	girl		spôsob výučby	4	8	4	podľa vyplnených schopností - papiera od učiteľa	9	hry, prezentácie, prečo otázky	yes	hry, prezentácie, prečo otázky	yes	yes	yes	yes	rather yes	rather yes	rather yes	rather yes	4	yes	yes	4	3	had a little fun	we didn't do it with him	very much enjoyed	very much enjoyed	we didn't do it with him	had a little fun	probably yes	probably yes	I don't know, I haven't done	yes	yes	I don't know, I haven't done
Gymnázium M. Rúfusa	girl		spôsob výučby	3	7	4	papiere od učiteľa	8	všetko, čo bolo treba	yes	celé to bolo kreatívne	yes	yes	yes	rather yes	yes	yes	rather yes	yes	2	rather yes	yes	4	3	very much enjoyed	we didn't do it with him	very much enjoyed	very much enjoyed	we didn't do it with him	very much enjoyed	probably yes	probably yes	I don't know, I haven't done	probably yes	probably yes	I don't know, I haven't done
Gymnázium M. Rúfusa	girl		forma výučby	3	7	4	kvality a schopnosti - dokument	9	všetci sme robili všetko	yes	nápady na hru/aplikáciu, dizajn	yes	yes	yes	yes	rather yes	rather yes	rather yes	rather yes	3	yes	yes	4	4	very much enjoyed	we didn't do it with him	very much enjoyed	very much enjoyed	we didn't do it with him	very much enjoyed	probably yes	probably yes	I don't know, I haven't done	probably yes	probably yes	I don't know, I haven't done
Gymnázium M. Rúfusa	girl		vyučovano v skupinách	4	8	4	papier od učiteľa	8	aplikácie	rather yes		yes	yes	yes	yes	yes	yes	rather yes	yes	2	yes	yes	3	3	had a little fun	we didn't do it with him	had a little fun	had a little fun	we didn't do it with him	had a little fun	probably yes	probably yes	I don't know, I haven't done	probably yes	probably yes	I don't know, I haven't done
				3.54615	7.06923																		3.94615	3.59231
